# Supplementary material for: A straightforward TBHP-mediated synthesis of 2-amidobenzoic acids from 2-arylindoles and their antimicrobial activity
Source: Royal Society of Chemistry journal article supplement (doi:10.1039/c9ob00797k), 2019-01-01

## *Electronic Supplementary Information*

### **A straightforward TBHP-mediated synthesis of 2-amidobenzoic acids from 2 arylindoles and their antimicrobial activity**

Om P. S. Patel,<sup>a,‡</sup> Shiv Dhiman,<sup>a,‡</sup> Shahid Khan,<sup>b</sup> Vikki N. Shinde,<sup>a</sup> Sonam Jaspal,<sup>a</sup> Manu R. Srivathsa,<sup>a</sup> Prabhat N. Jha<sup>b</sup> and Anil Kumar<sup>a,\*</sup>

<sup>a</sup>*Department of Chemistry, Birla Institute of Technology and Science Pilani, Pilani, Campus, 333031, Rajasthan, India.*

<sup>b</sup>*Department of Biological Sciences, Birla Institute of Technology and Science Pilani, Pilani, Campus, 333031, Rajasthan, India*

‡Equal contribution to this work

Corresponding Author: [\\*anilkumar@pilani.bits-pilani.ac.in](mailto:*anilkumar@pilani.bits-pilani.ac.in) (A. K.)

#### **Table of Contents**

1. Procedure for the synthesis of **3a** .....S2
2. Copies of the NMR and ESI-HRMS data for all the compounds.....S3-S76
3. Unambiguous molecular structure determination of **3s**.....S77

### 1. Procedure for the synthesis of **3a**:

To a solution of 2-phenylindole **1a** (0.518 mmol) and 2-aminopyridine (0.62 mmol) and Cu(OAc)<sub>2</sub>.H<sub>2</sub>O (20 mol %) in chlorobenzene (5 mL) was added TBHP (1.55 mmol, 70% aqueous solution) at room temperature and the reaction mixture was stirred at 120 °C with a reflux condenser for 2 h. After completion of the reaction, observed by TLC, the mixture was allowed to attain room temperature. The reaction mixture was poured into water (20 mL) and extracted with ethyl acetate (3 × 15 mL). The combined organic layer was dried over Na<sub>2</sub>SO<sub>4</sub> and evaporated under vacuum. The resulting crude solid was purified by column chromatography (silica gel 100-200 mesh) using *n*-hexane (100%) as an eluent to afford as the red color amorphous solid product in 70% yield.

**\*Note:** The <sup>1</sup>H NMR analysis of isolated product showed the mixture of two compounds *i.e.* 2-phenyl-3H-indol-3-one (**3a**) and 2-phenyl-4*H*-benzo[d][1,3]oxazin-4-one (**4a**) in 10: 3.5 NMR ratio. We have tried multiple column chromatographies to separate out the mixture of **3a** and **4a**. However due to inseparable spots on TLC and highly non-polar in nature, we could not isolate them in a pure form. The mixture was directly used for the control reaction as described in the manuscript.

## 2. Copies of the NMR and ESI-HRMS data for all the compounds

Apr02-2018  
MS/SD-1013

— 13.7545

— 12.2060

8.7407  
8.7198  
8.0854  
8.0660  
7.9848  
7.9663  
7.6985  
7.6797  
7.6618  
7.6453  
7.6242  
7.6059  
7.5887  
7.2432  
7.2245  
7.2059

— 2.5124

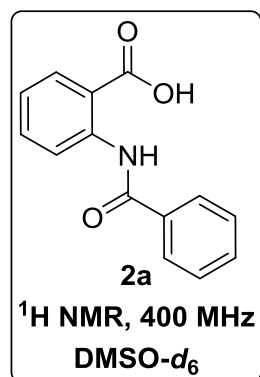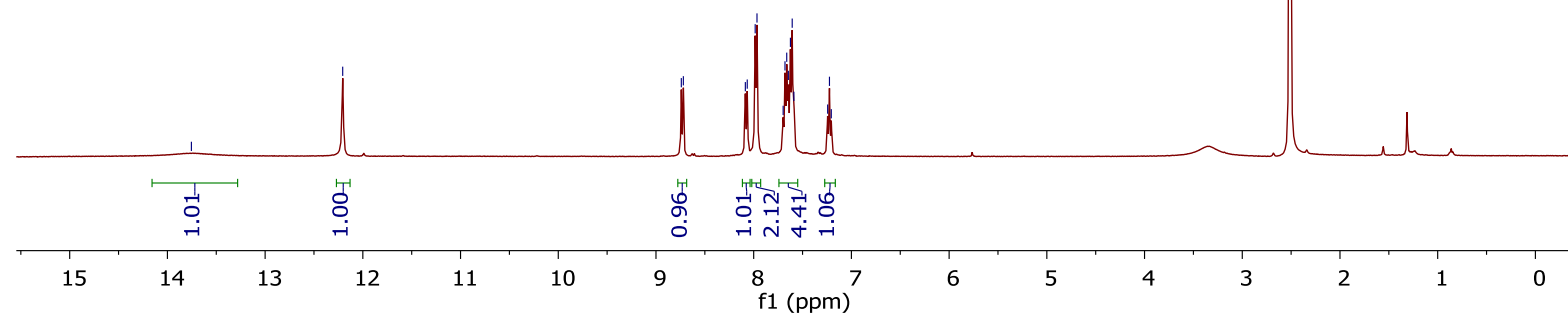

Apr02-2018  
MS/SD-1013

— 170.47  
— 165.17

141.58  
135.02  
134.76  
132.65  
131.75  
129.46  
127.48  
123.42  
120.36  
117.08

40.65  
40.44  
40.24  
40.03  
39.82  
39.61  
39.40

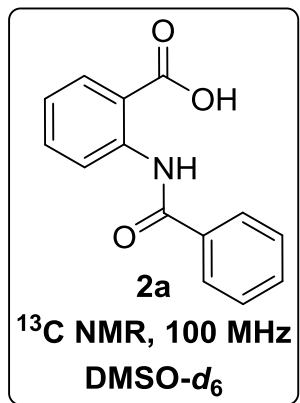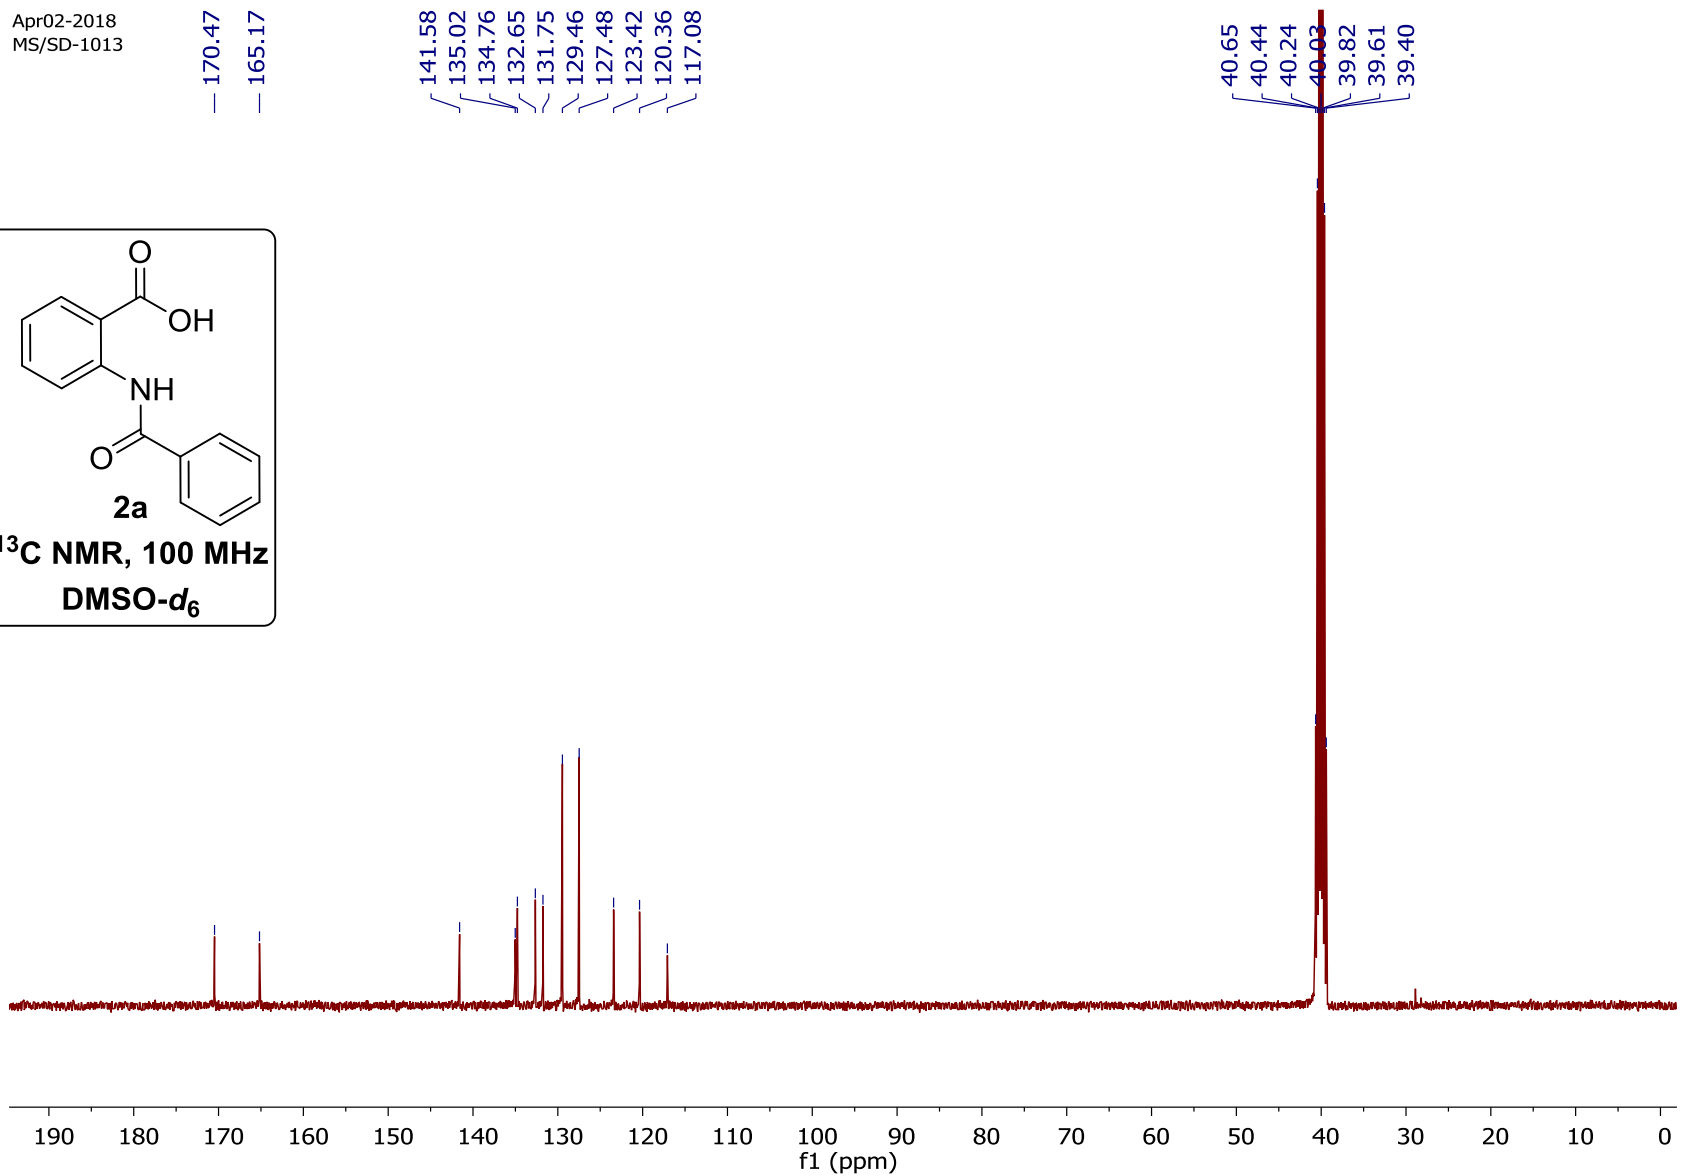

|               |              |             |                      |                 |              |                        |                        |
|---------------|--------------|-------------|----------------------|-----------------|--------------|------------------------|------------------------|
| Sample Name   | M5-SD-1013   | Position    | P2-E10               | Instrument Name | Instrument 1 | User Name              |                        |
| Inj Vol       | 0.25         | InjPosition |                      | SampleType      | Sample       | IRM Calibration Status | Success                |
| Data Filename | M5-SD-1013.d | ACQ Method  | ChB60ChA40Dual AJS E | Comment         |              | Acquired Time          | 10/29/2018 12:21:45 PM |

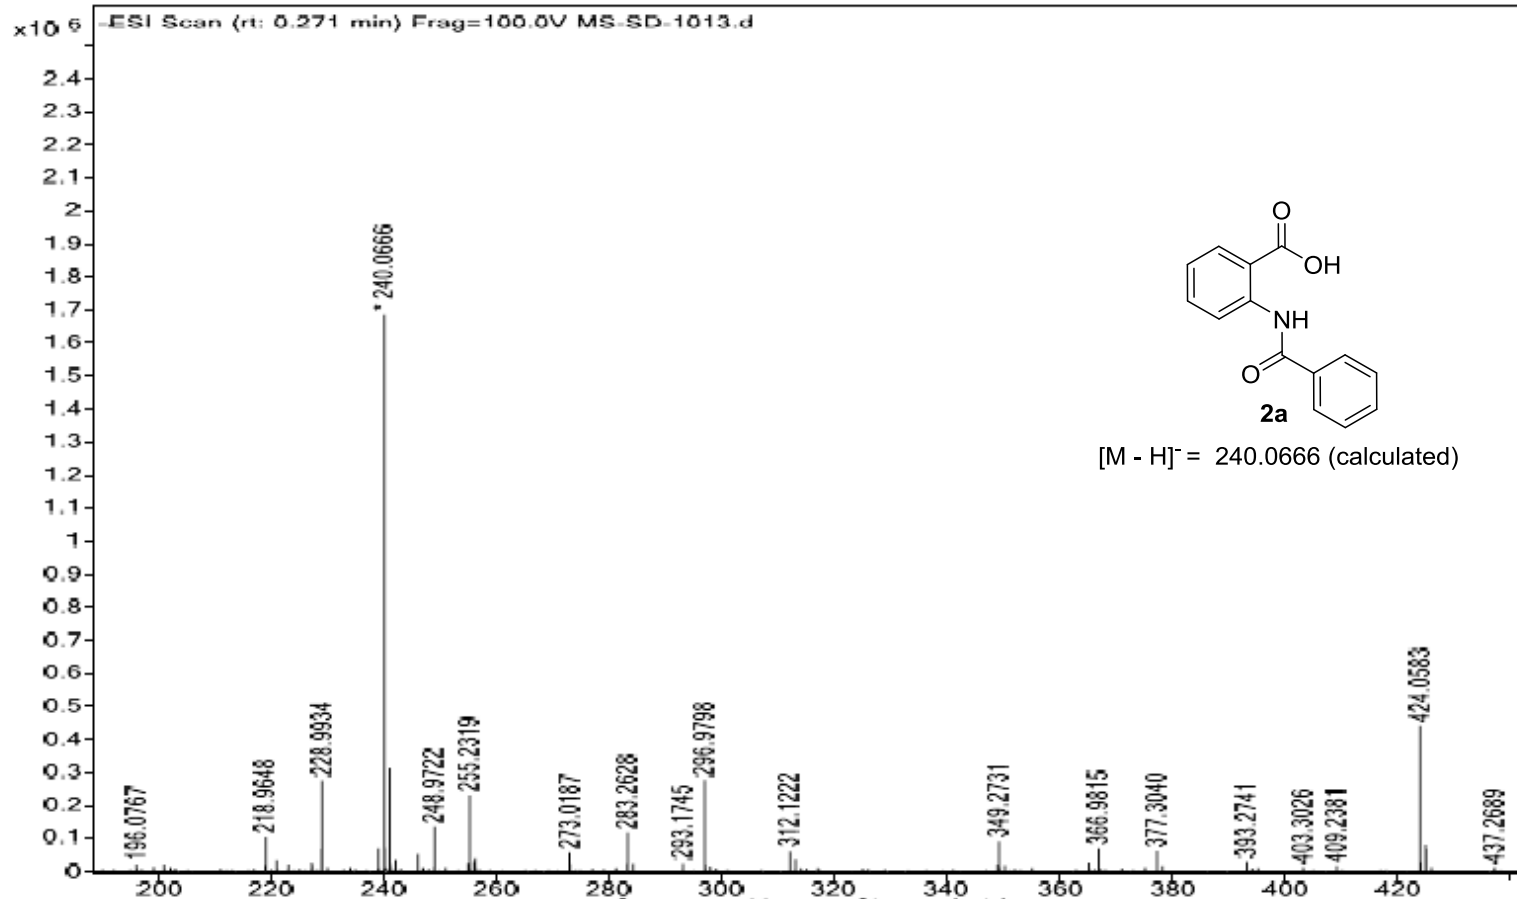

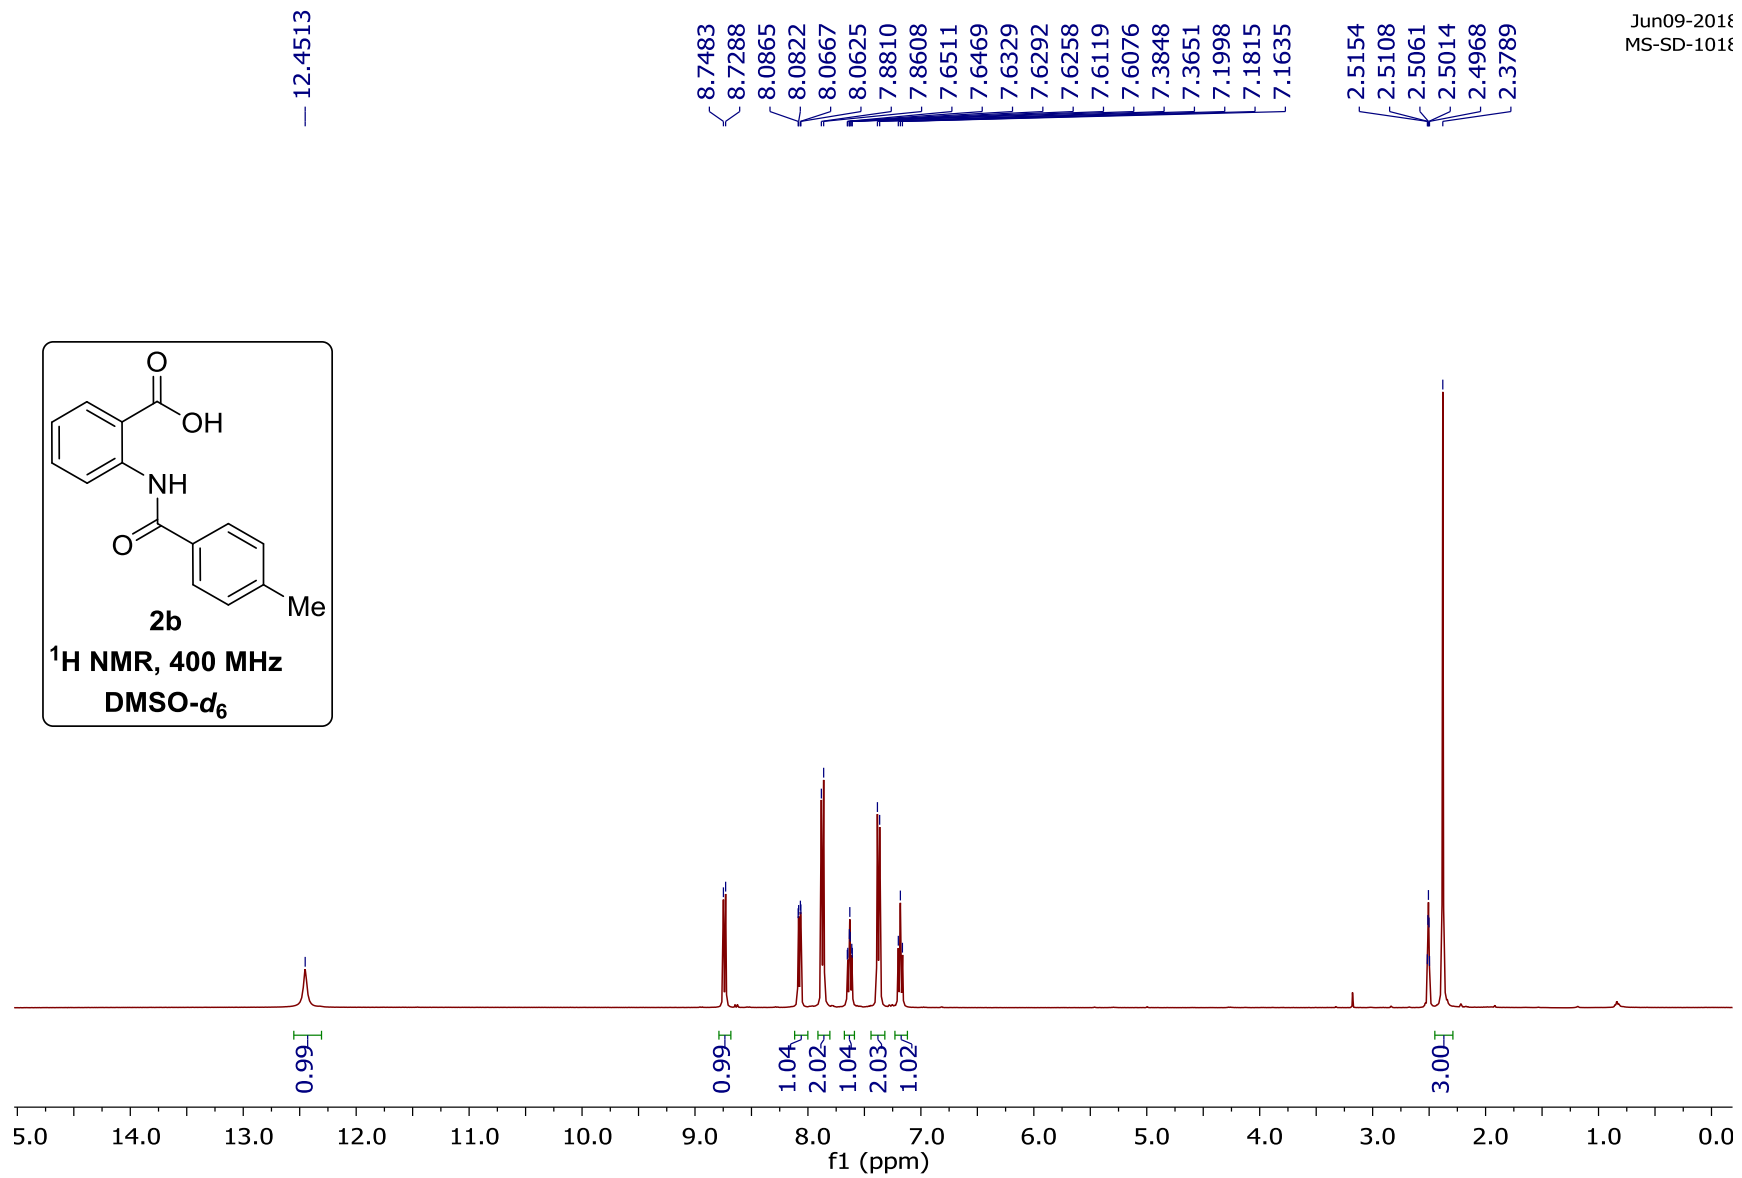

Jun09-2018  
MS-SD-1018

— 170.68  
— 165.01

142.70  
141.73  
134.39  
132.28  
131.78  
129.94  
127.52  
123.11  
120.09  
117.58

40.61  
40.40  
40.19  
39.98  
39.77  
39.56  
39.36

— 21.45

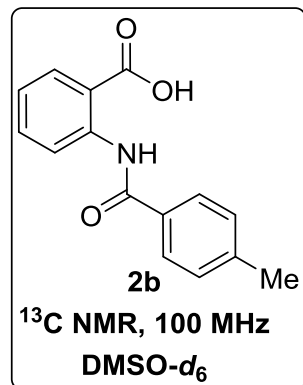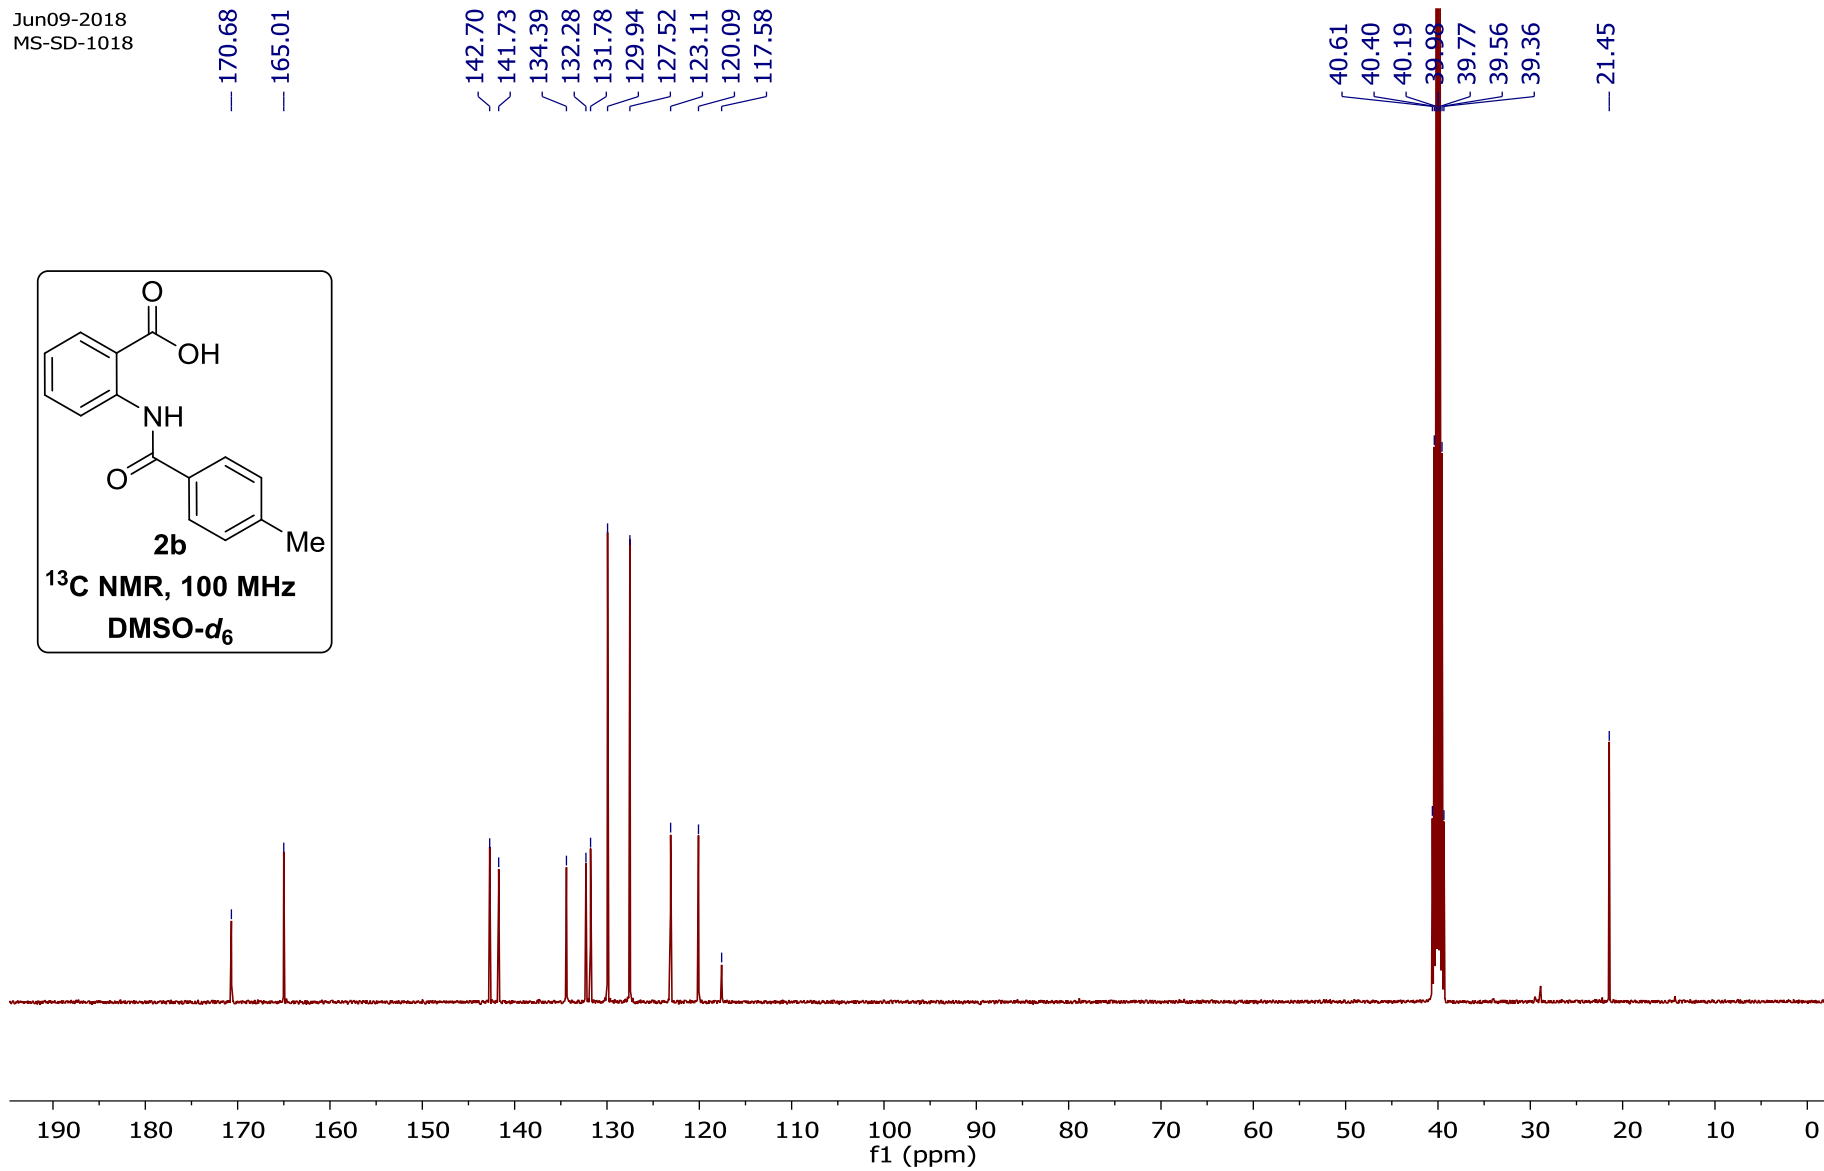

|               |              |             |                      |                 |              |                        |                     |
|---------------|--------------|-------------|----------------------|-----------------|--------------|------------------------|---------------------|
| Sample Name   | MS-SD-1018   | Position    | P1-B4                | Instrument Name | Instrument 1 | User Name              |                     |
| Inj Vol       | 0.25         | InjPosition |                      | SampleType      | Sample       | IRM Calibration Status | Success             |
| Data Filename | MS-SD-1018.d | ACQ Method  | ChB60ChD40Dual AJS E | Comment         |              | Acquired Time          | 1/2/2019 5:38:19 PM |

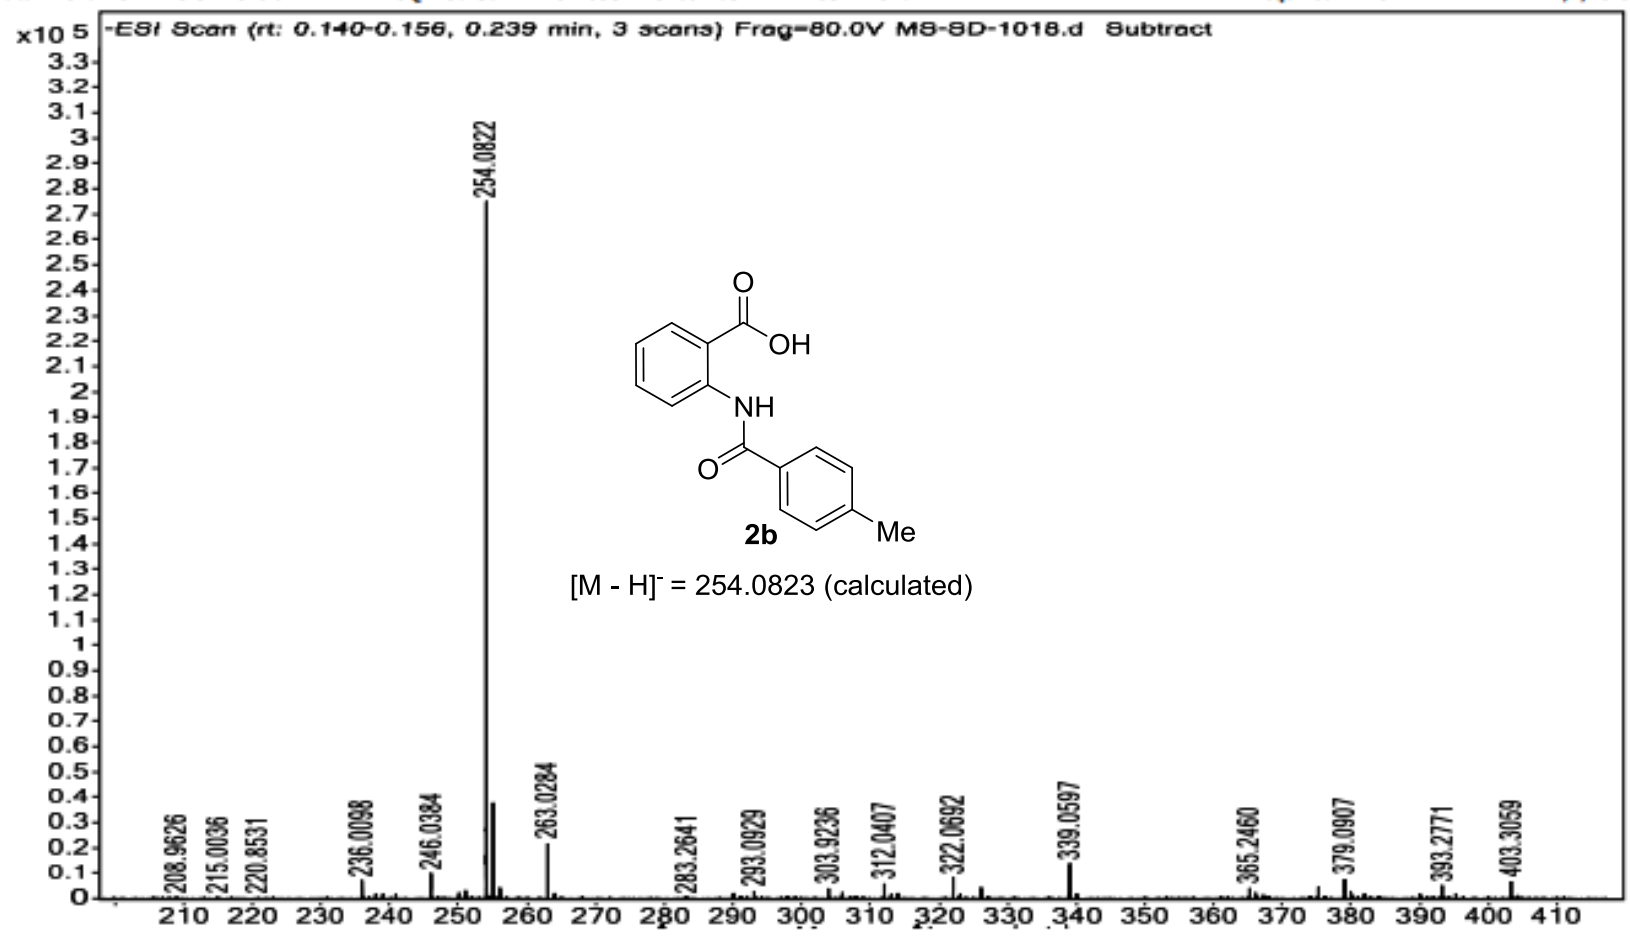



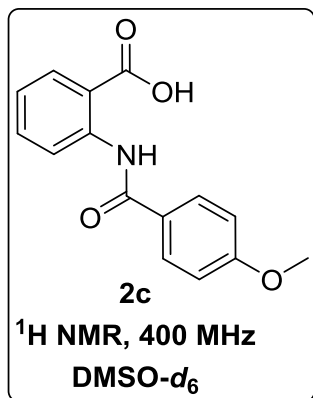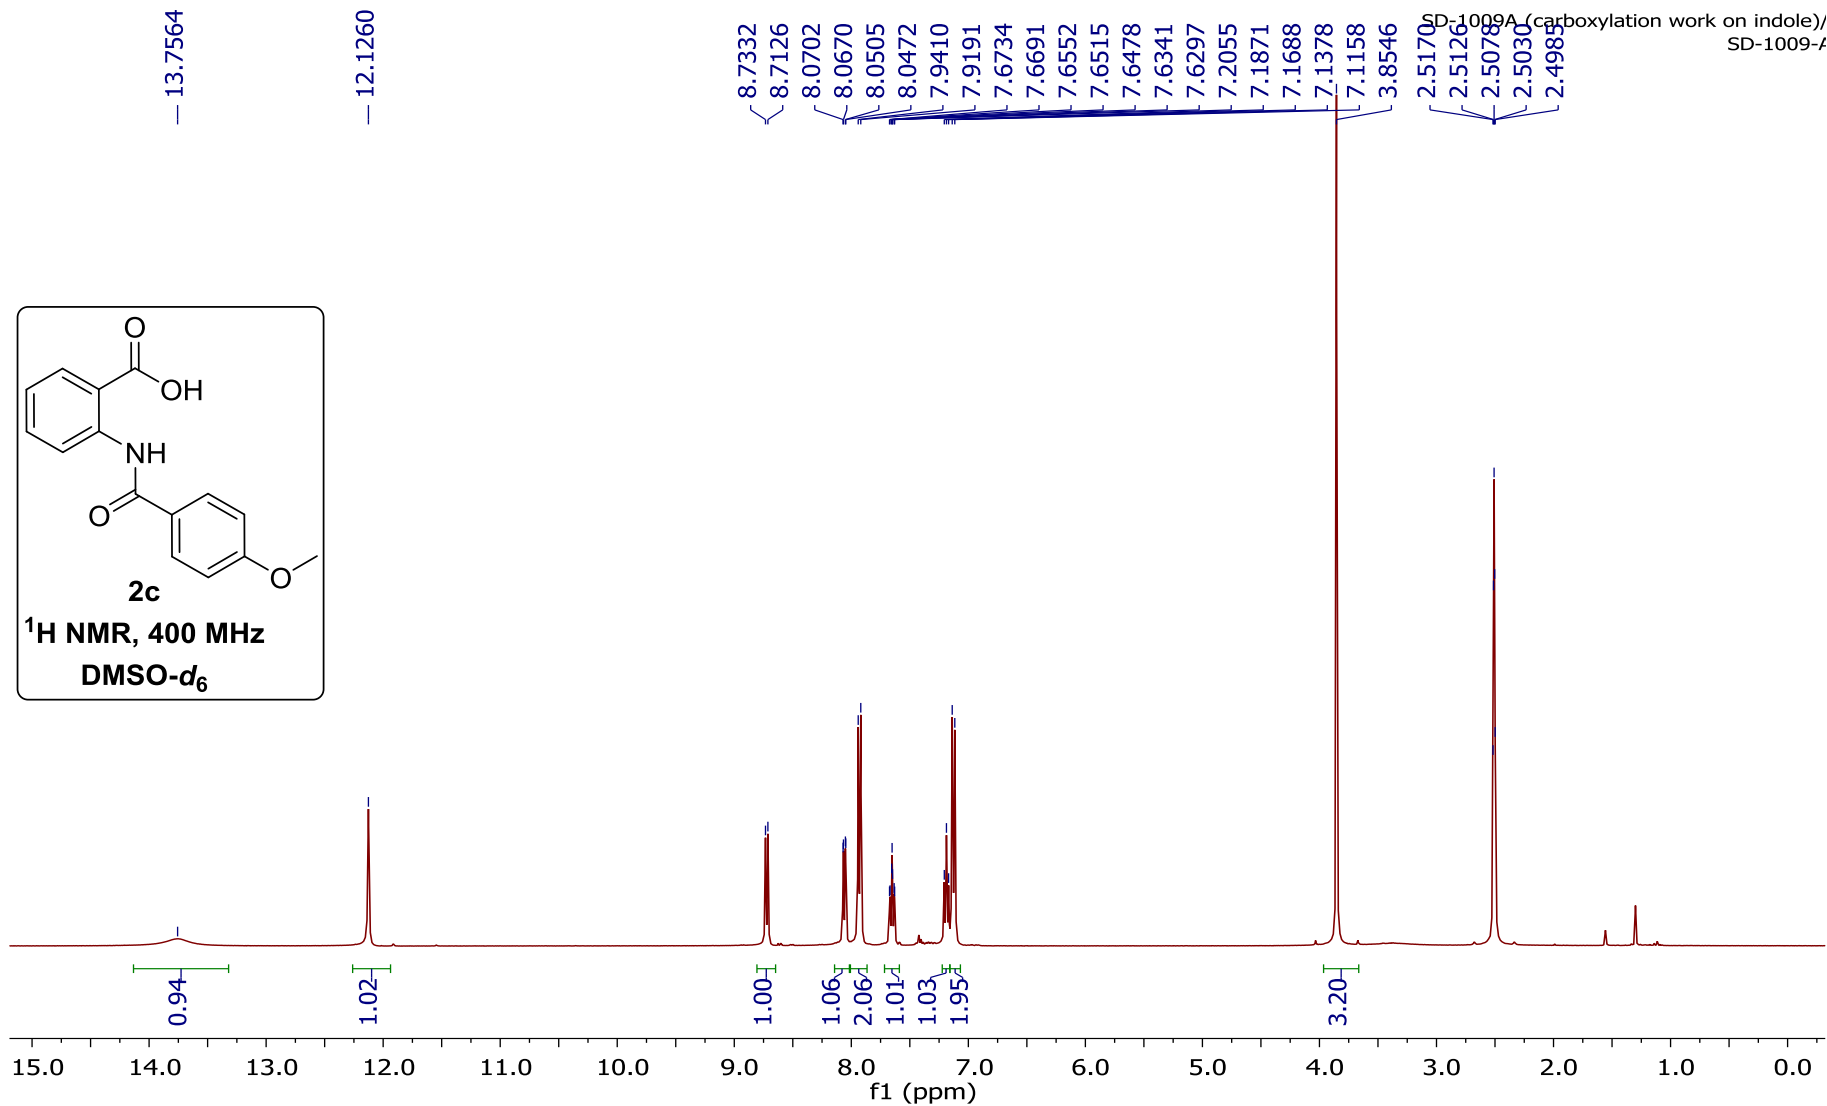

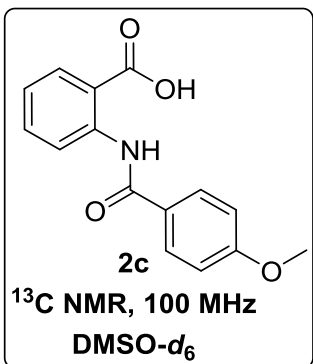

~ 170.55  
 / 164.66  
 / 162.79

— 141.89  
 / 134.75  
 / 131.73  
 / 129.42  
 / 127.10  
 / 123.07  
 / 120.20  
 / 116.71  
 / 114.70

— 55.98  
 { 40.64  
 { 40.43  
 { 40.22  
 { 40.01  
 { 39.81  
 { 39.60  
 { 39.39  
 SD-1009A (carboxylation work on indole)/  
 SD-1009-7

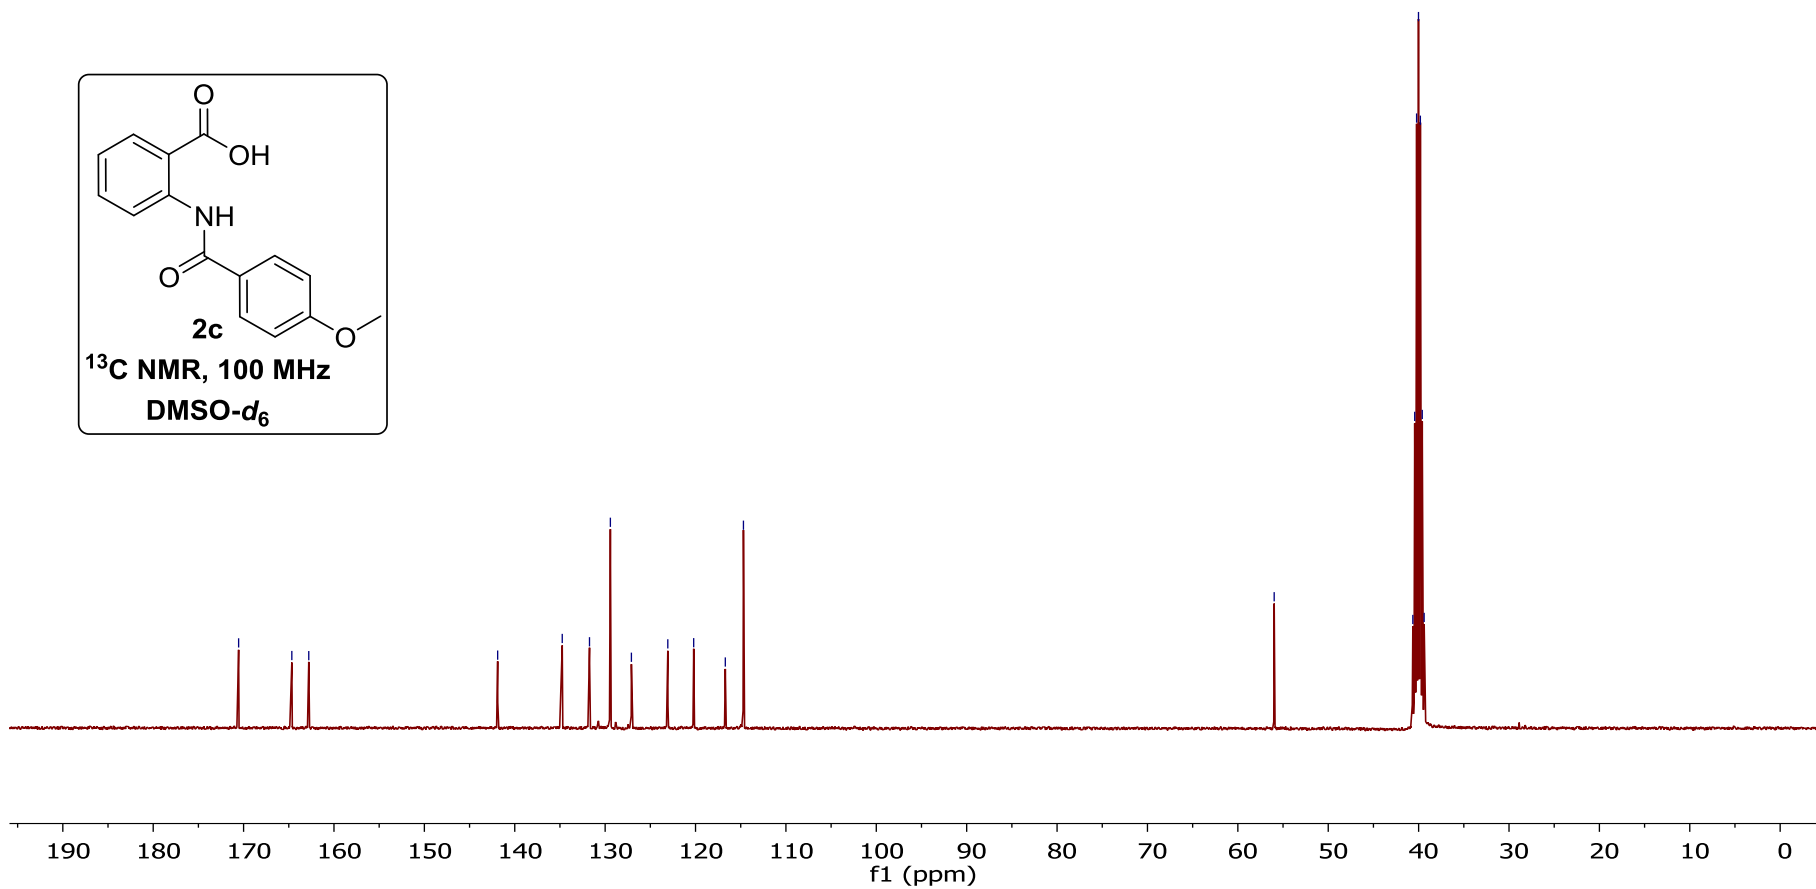

|               |              |             |                      |                 |              |                        |                       |
|---------------|--------------|-------------|----------------------|-----------------|--------------|------------------------|-----------------------|
| Sample Name   | MS-SD-1009   | Position    | P2-F5                | Instrument Name | Instrument 1 | User Name              |                       |
| Inj Vol       | 0.25         | InjPosition |                      | SampleType      | Sample       | IRM Calibration Status | Success               |
| Data Filename | MS-SD-1009.d | ACQ Method  | Ch860ChA40Dual.AJS.E | Comment         |              | Acquired Time          | 10/29/2018 1:11:27 PM |

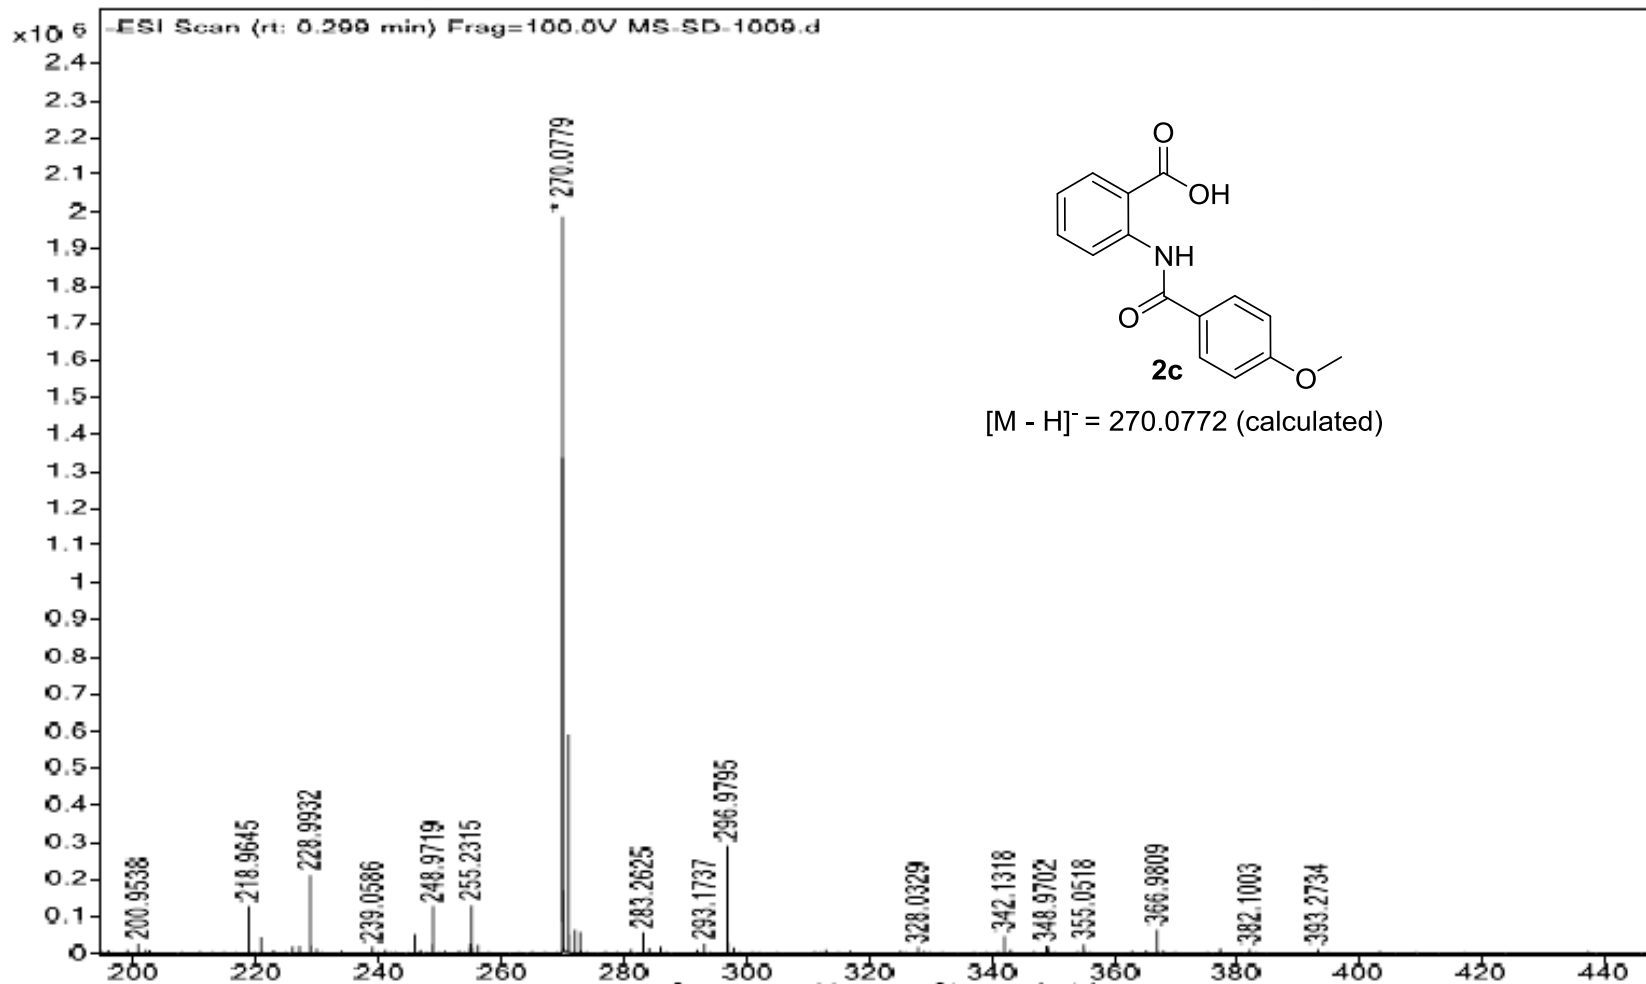

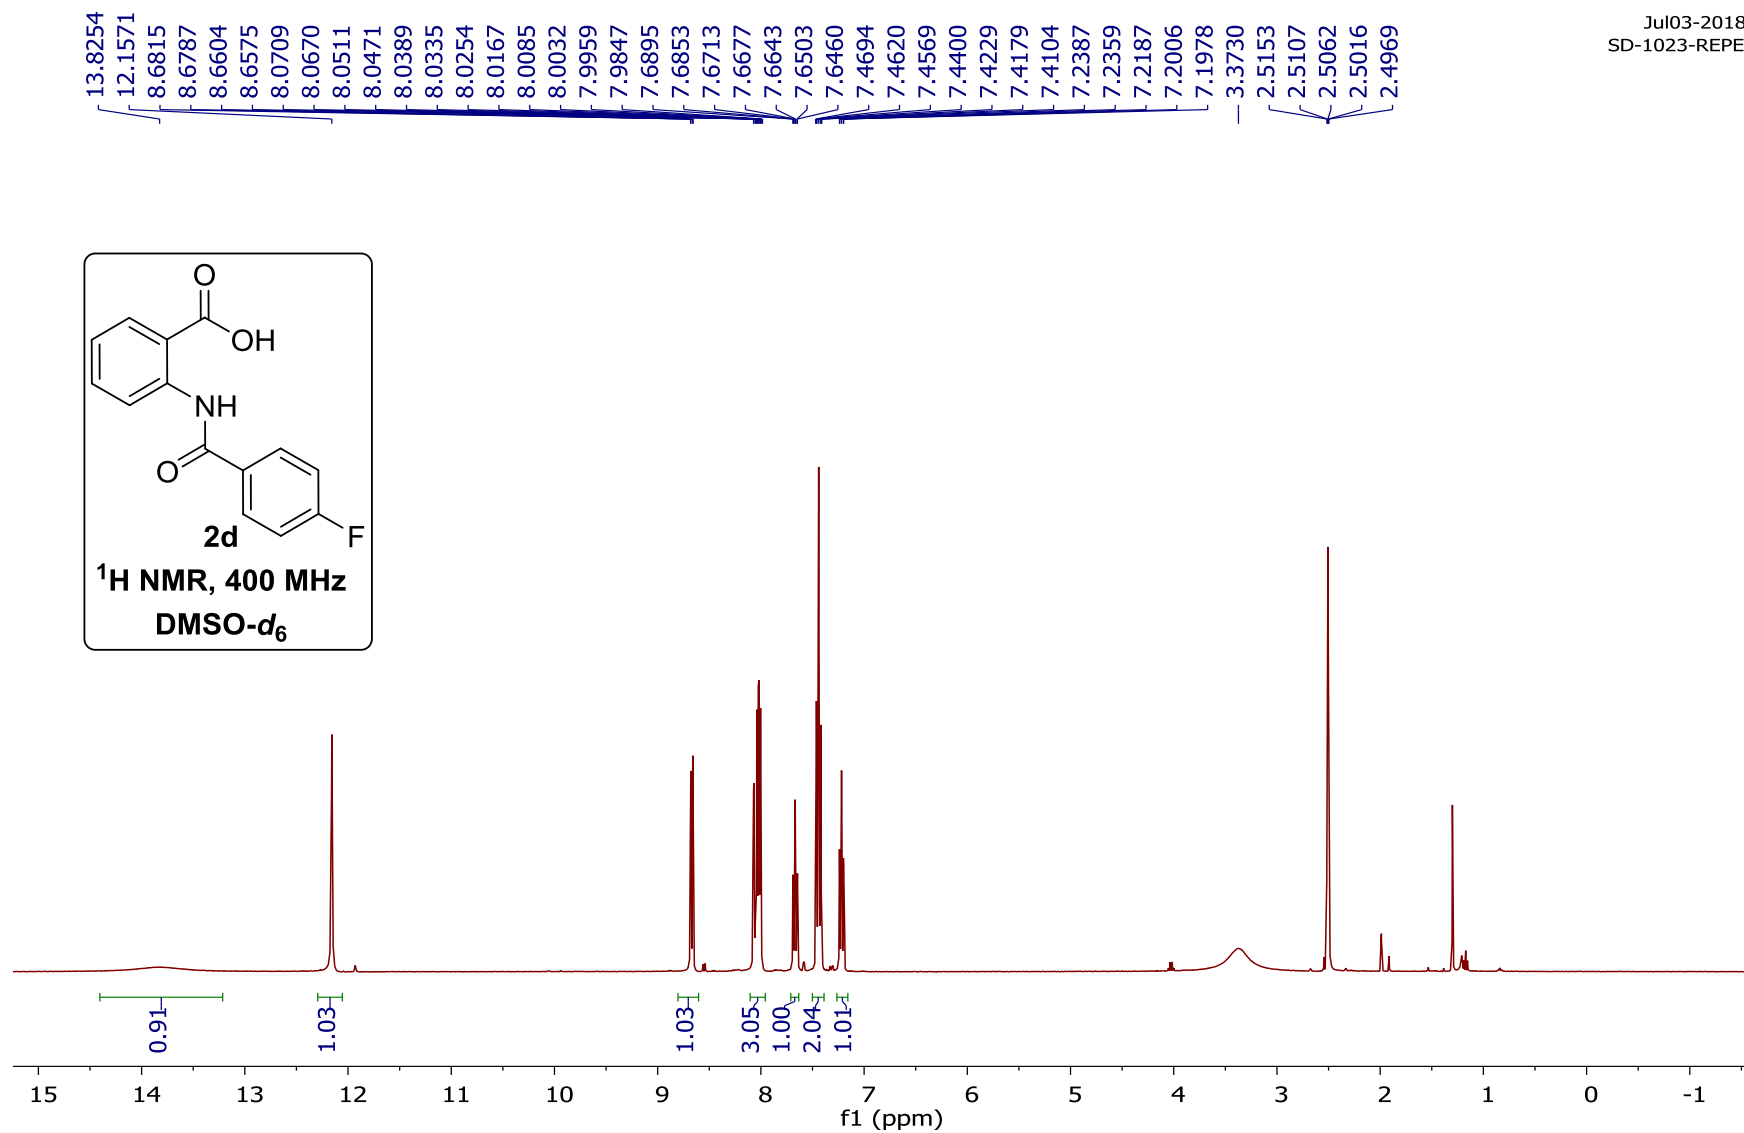

Jun29-2018  
SD-1023

170.46  
166.06  
164.11  
163.58

141.43  
134.75  
131.73  
131.54  
131.51  
130.28  
130.19  
123.52  
120.44  
117.22  
116.59  
116.37

40.59  
40.39  
40.18  
39.97  
39.76  
39.55  
39.34

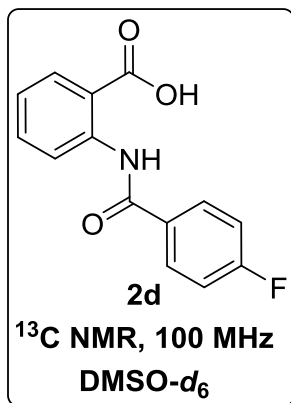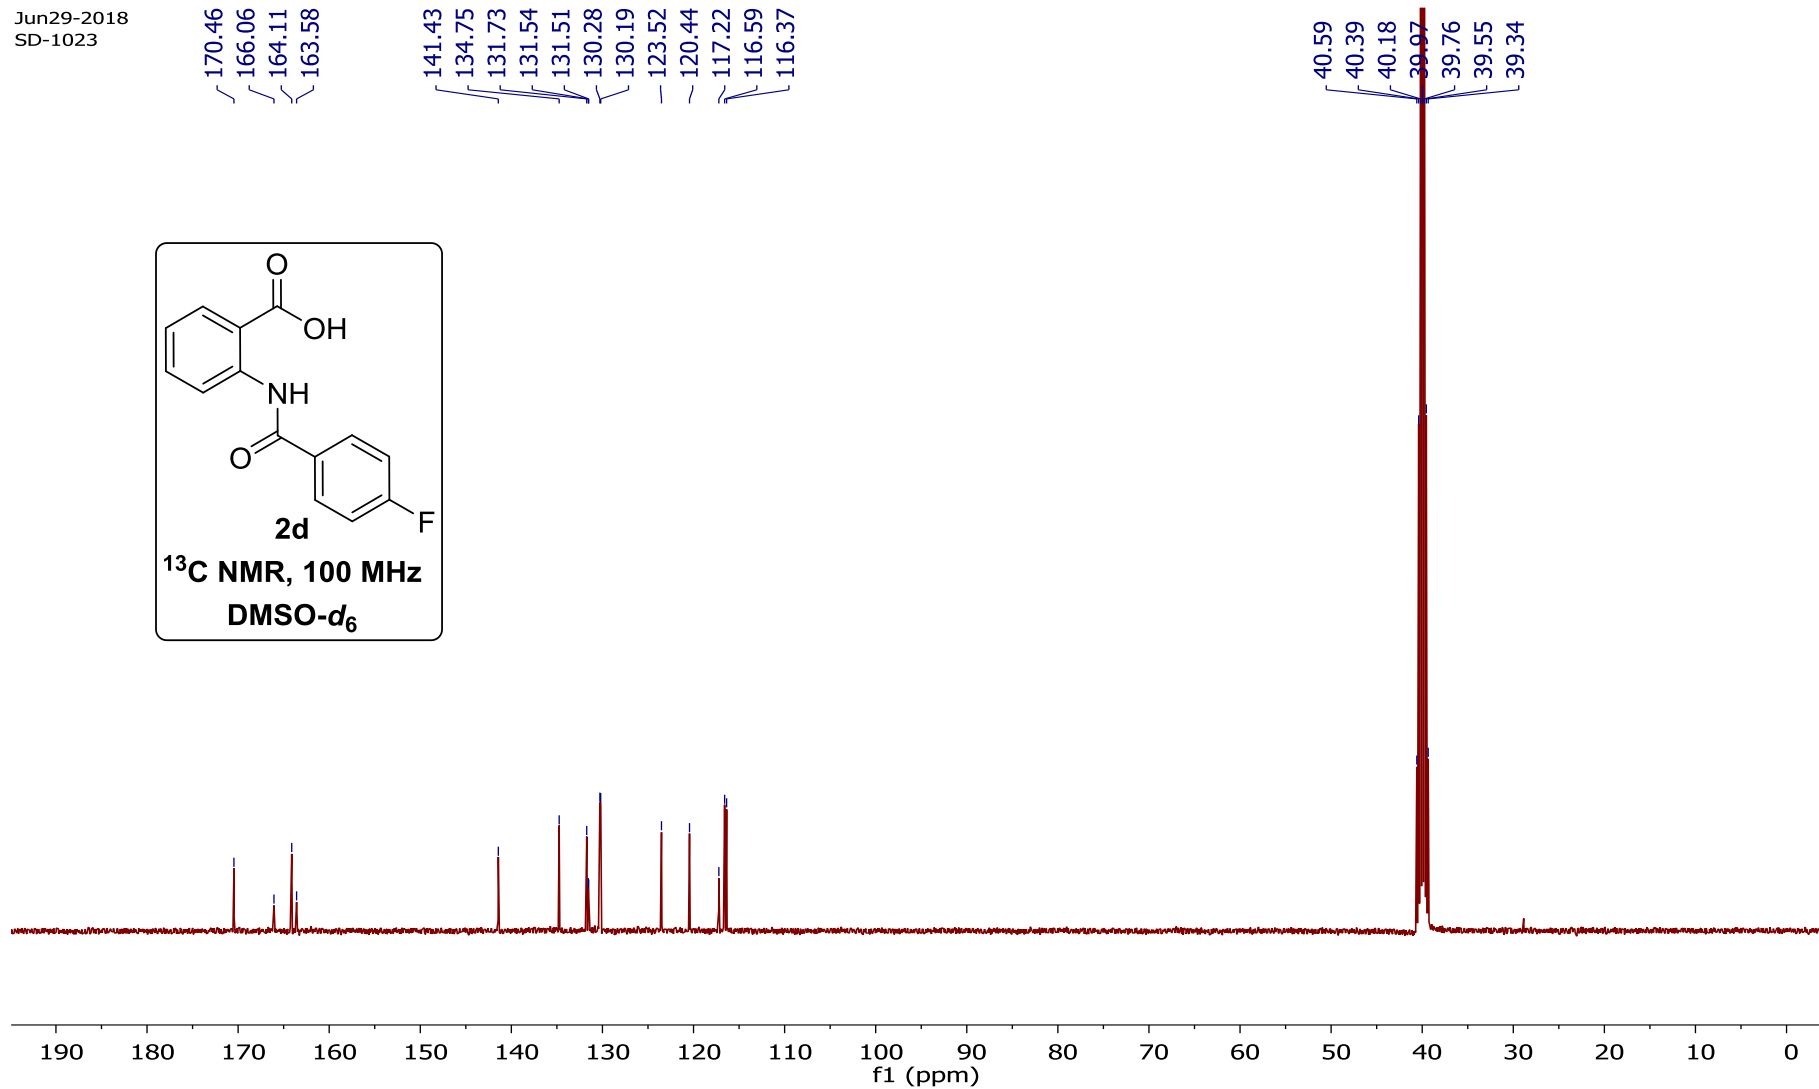

|               |              |             |                      |                 |              |                        |                       |
|---------------|--------------|-------------|----------------------|-----------------|--------------|------------------------|-----------------------|
| Sample Name   | M5-SD-1023   | Position    | P2-F6                | Instrument Name | Instrument 1 | User Name              |                       |
| Inj Vol       | 0.25         | InjPosition |                      | SampleType      | Sample       | IRM Calibration Status | Success               |
| Data Filename | M5-SD-1023.d | ACQ Method  | ChB60ChA40Dual AJS E | Comment         |              | Acquired Time          | 10/29/2018 1:19:42 PM |

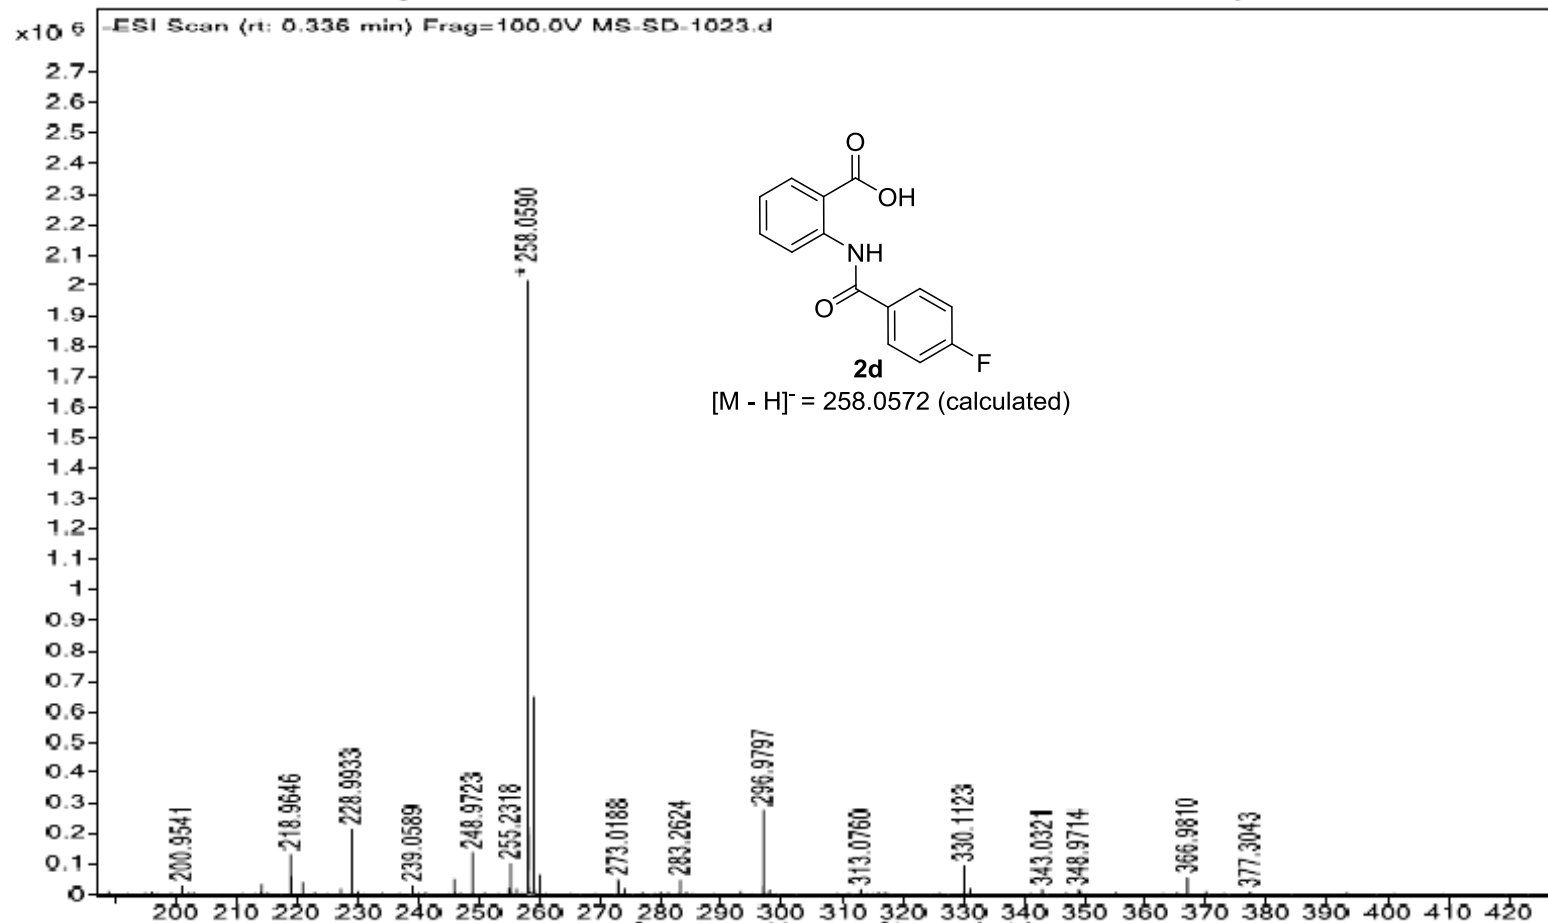

Jun09-2018  
MS-SD-1016

— 12.2383

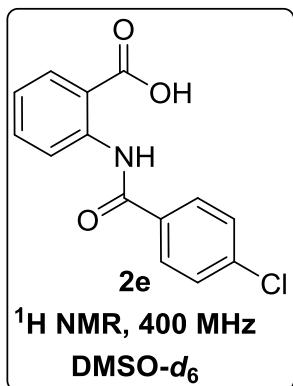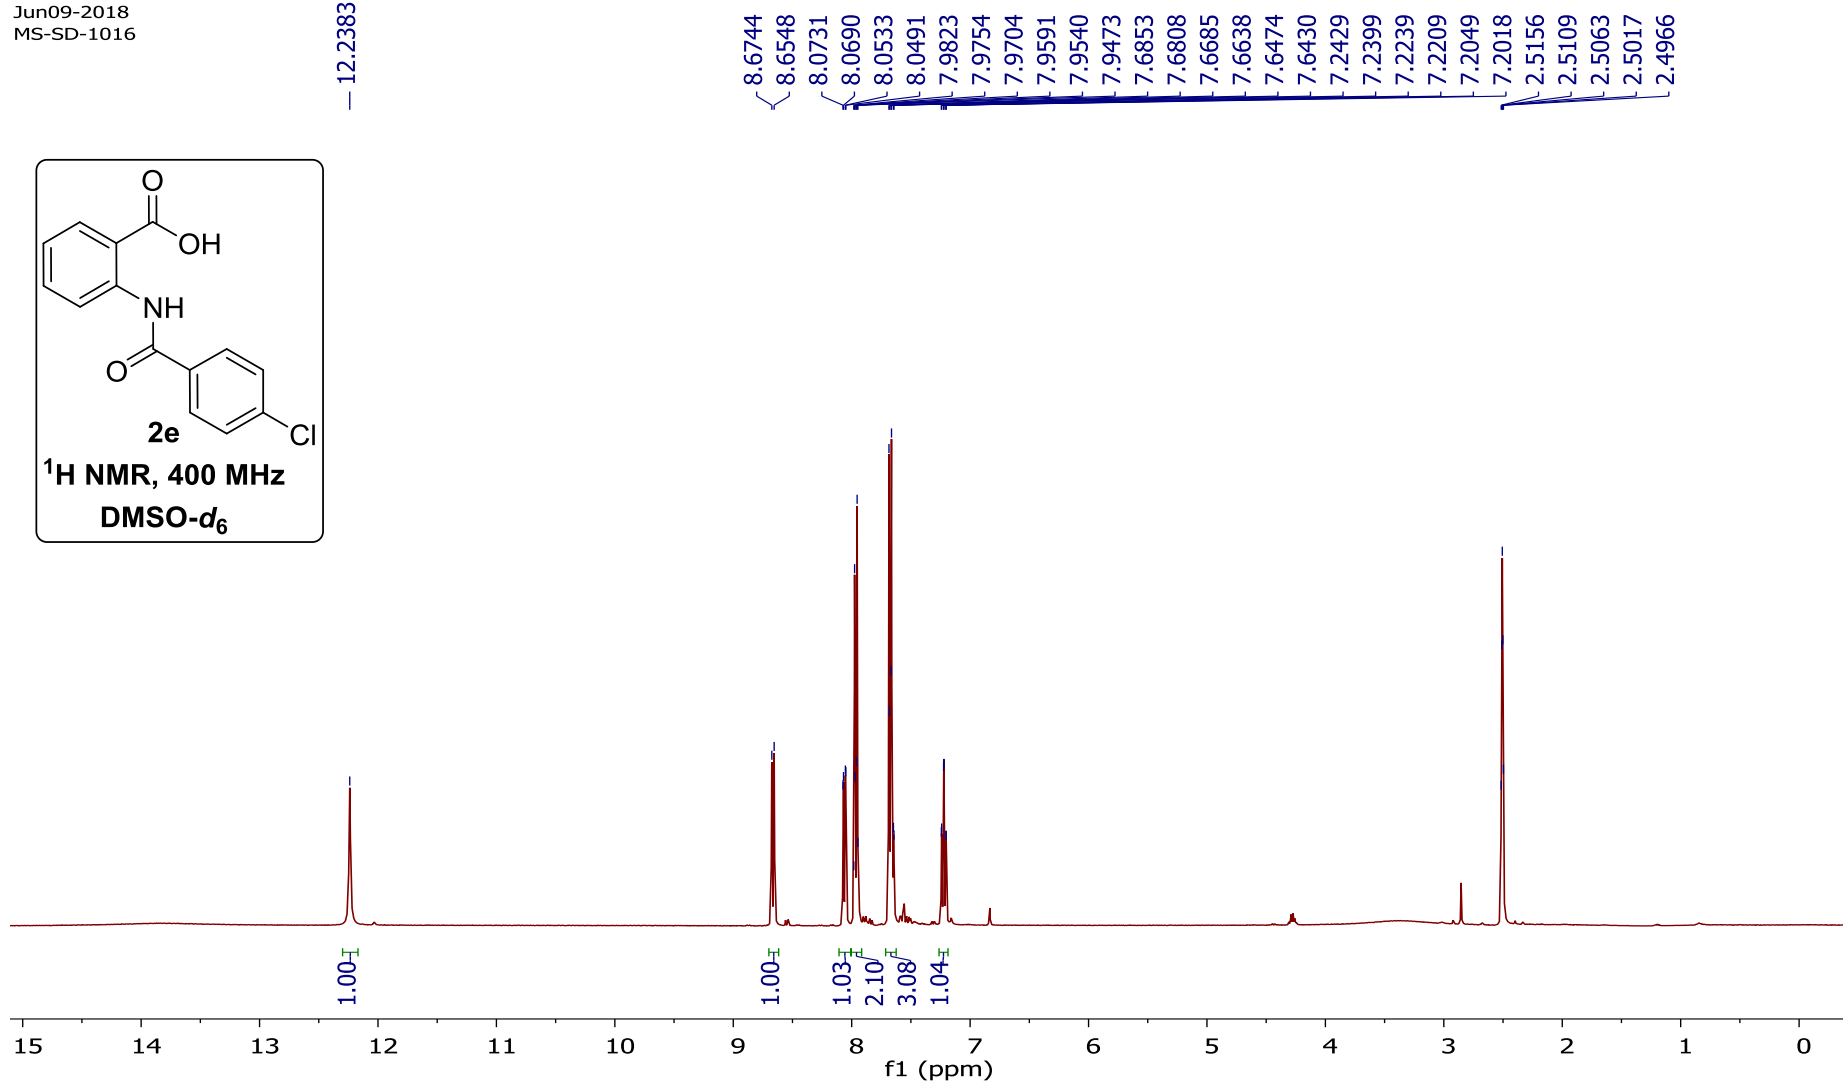

Jun09-2018  
MS-SD-1016

— 170.47  
— 164.12

141.32  
137.49  
134.69  
133.80  
131.74  
129.56  
129.41  
123.62  
120.48  
117.47

40.62  
40.42  
40.21  
40.00  
39.79  
39.58  
39.37

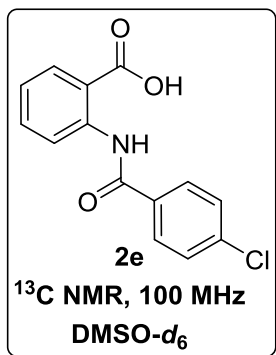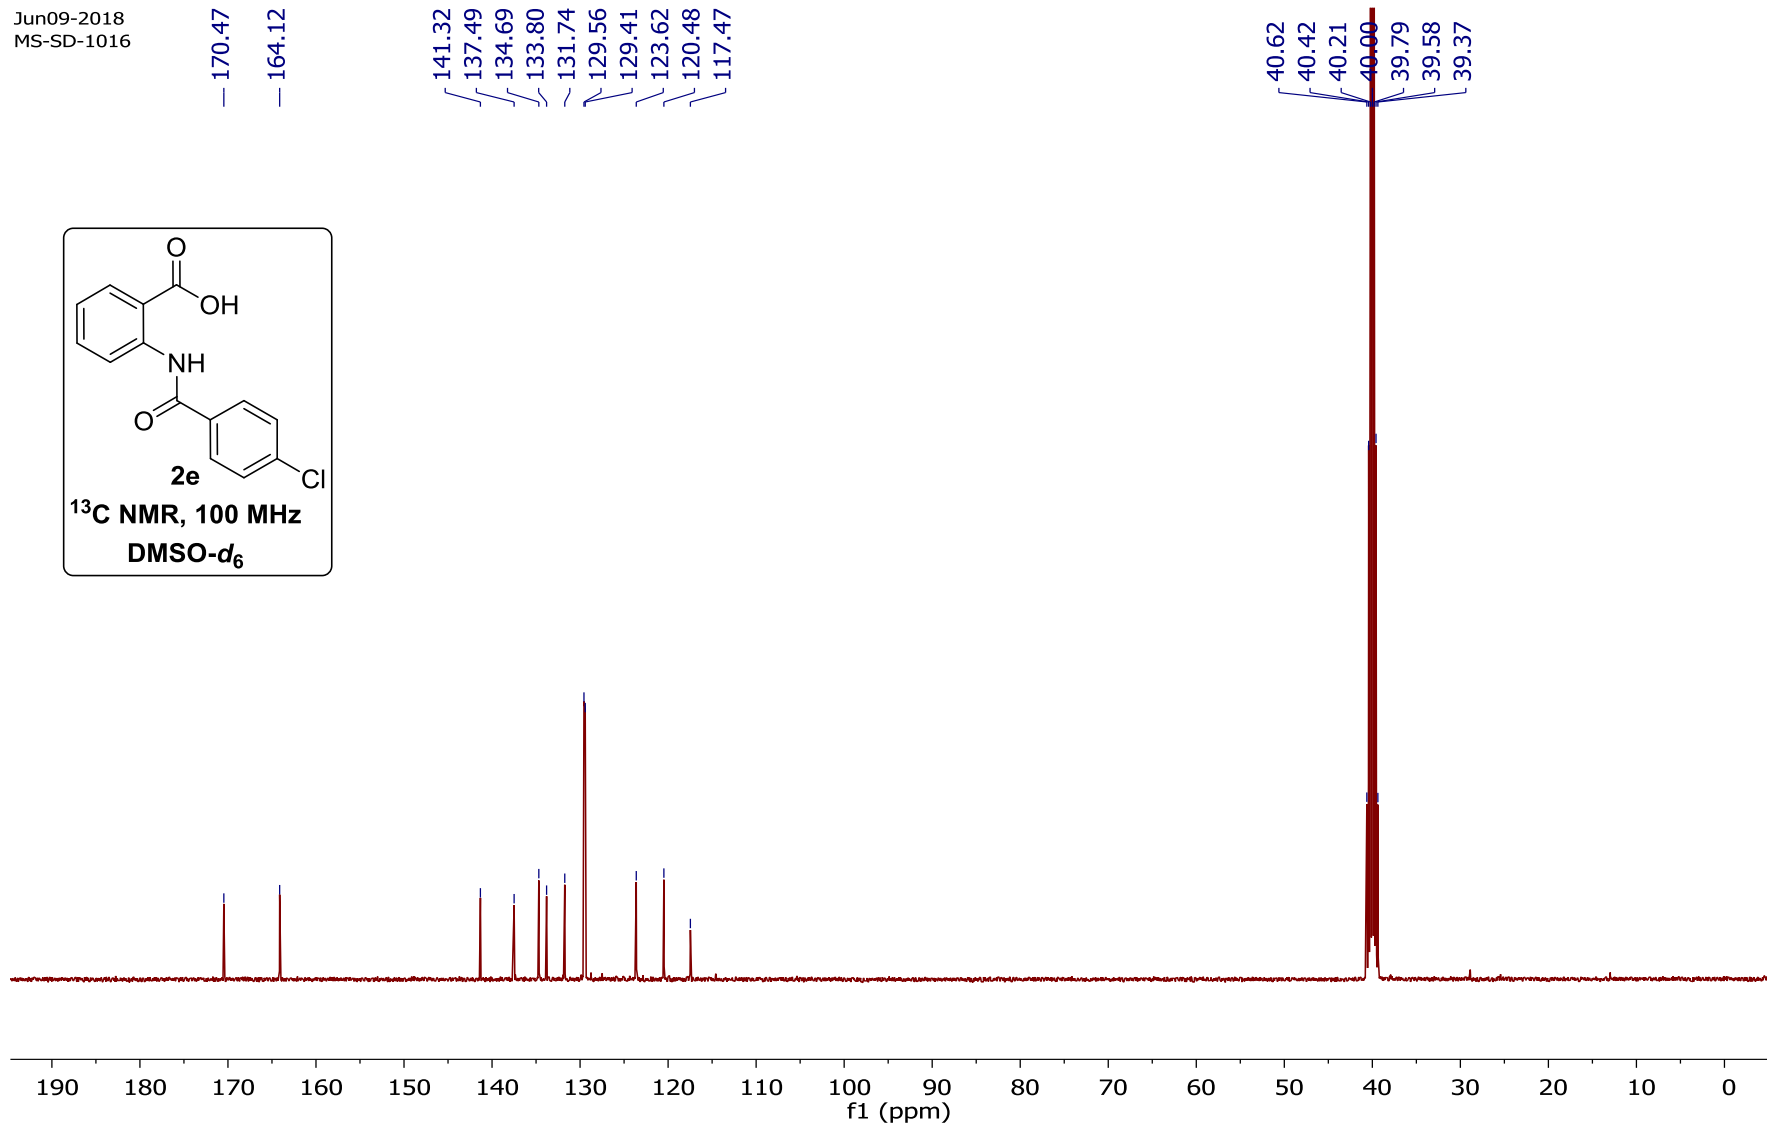



|               |              |             |                      |                 |              |                        |                        |
|---------------|--------------|-------------|----------------------|-----------------|--------------|------------------------|------------------------|
| Sample Name   | MS-SD-1016   | Position    | P2-F3                | Instrument Name | Instrument 1 | User Name              |                        |
| Inj Vol       | 0.25         | InjPosition |                      | SampleType      | Sample       | IRM Calibration Status | Success                |
| Data Filename | MS-SD-1016.d | ACQ Method  | ChB60ChA40Dual AJS E | Comment         |              | Acquired Time          | 10/29/2018 12:54:53 PM |

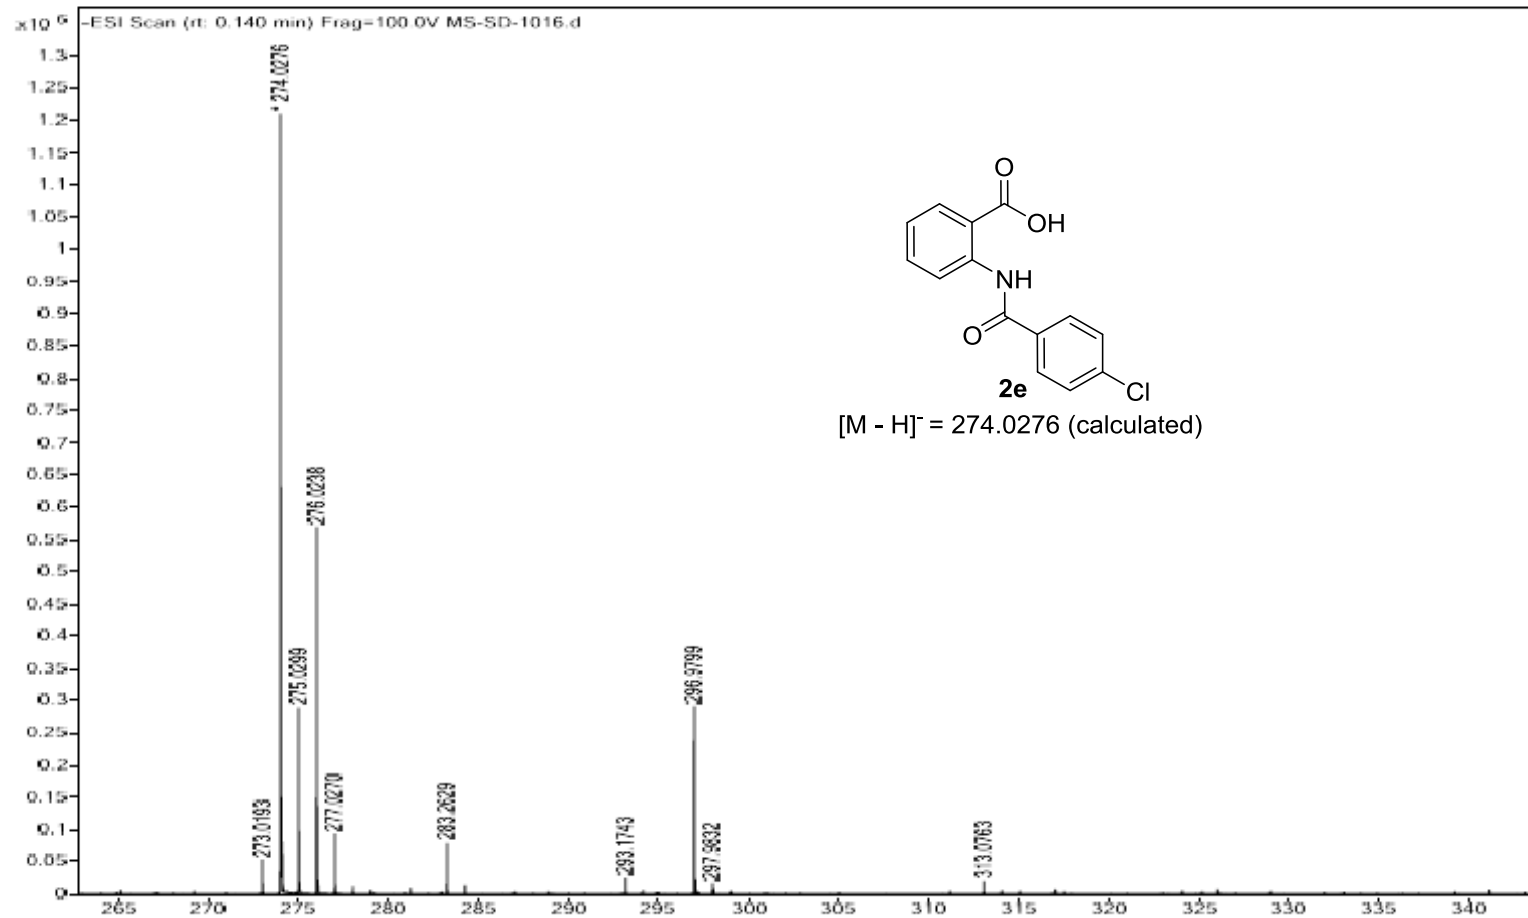

Jun28-2018  
MS/SD-1024

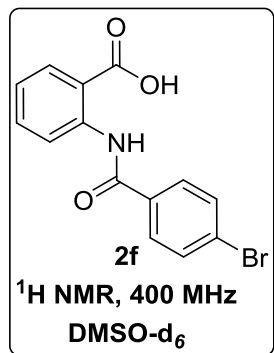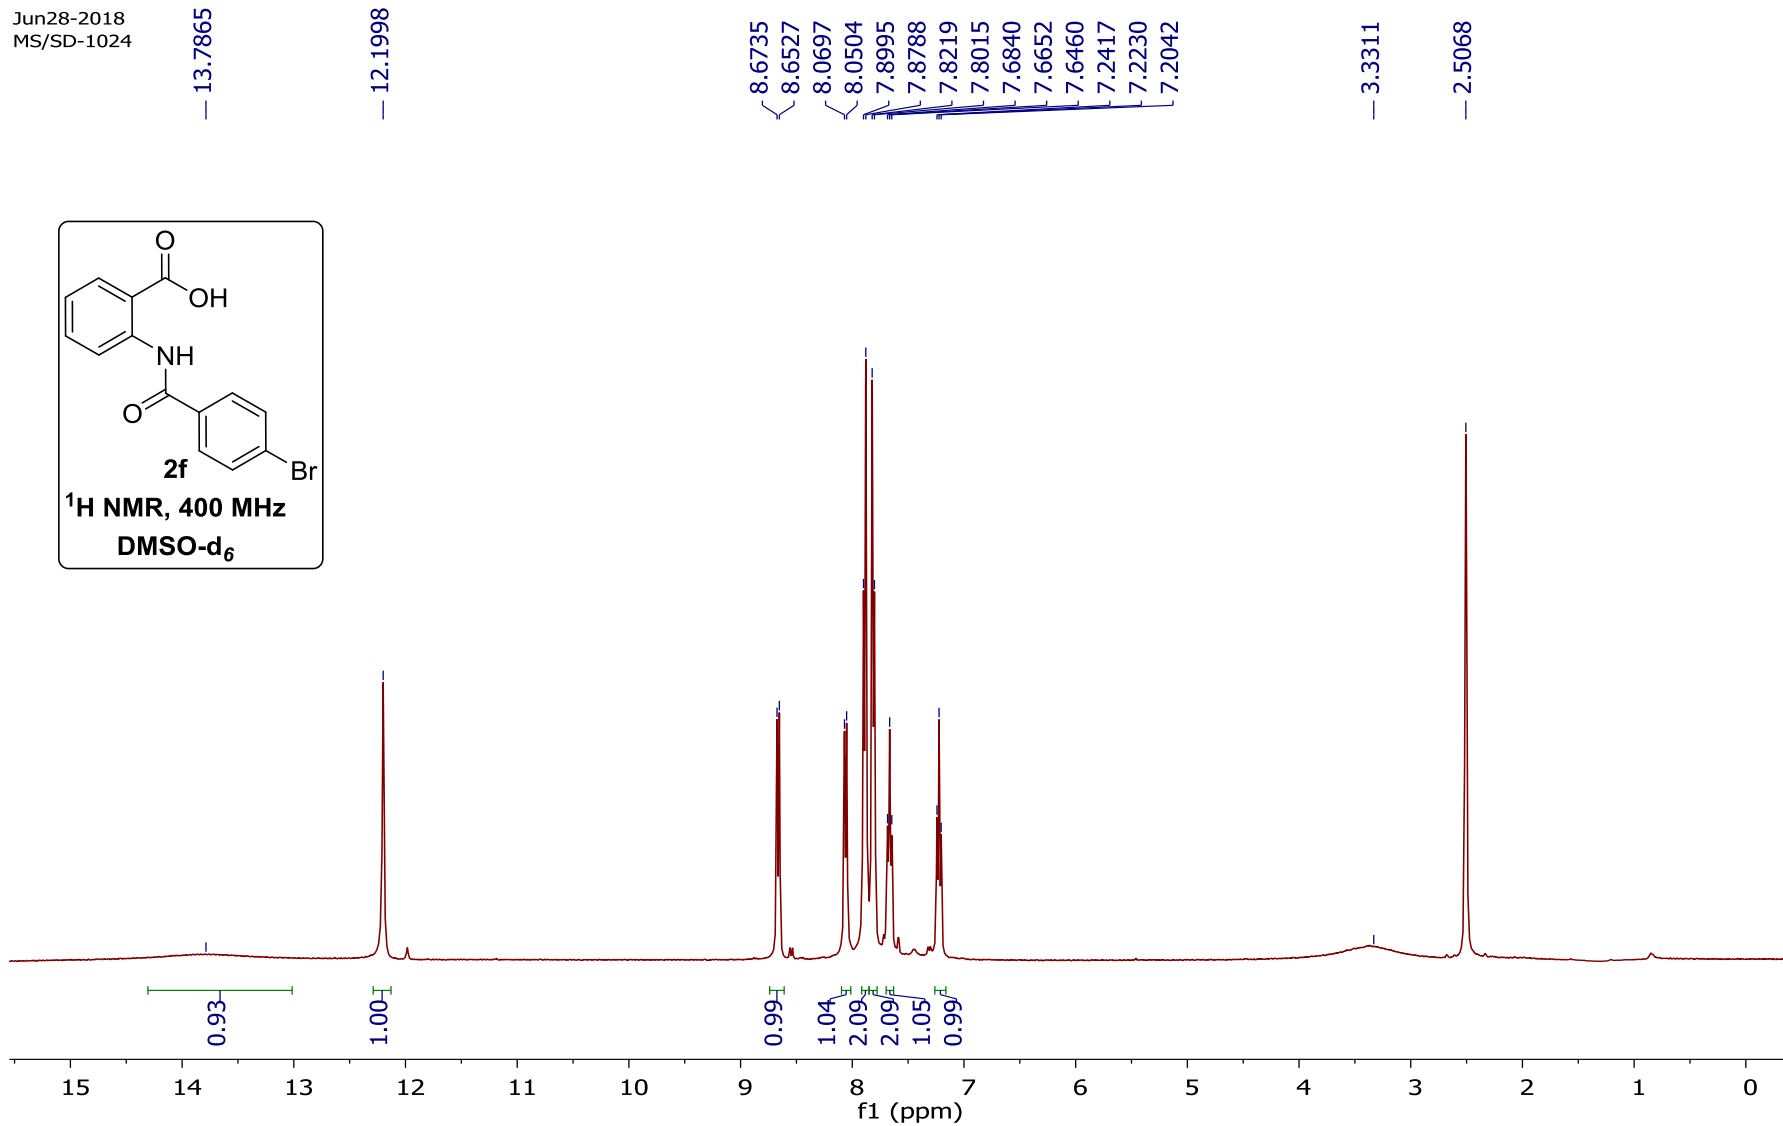

Jun28-2018  
MS/SD-1024

— 170.45  
— 164.25

141.30  
134.70  
134.16  
132.49  
131.72  
129.55  
126.45  
123.62  
120.49  
117.38

40.64  
40.43  
40.22  
40.01  
39.80  
39.59  
39.38

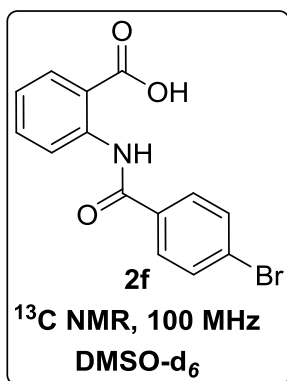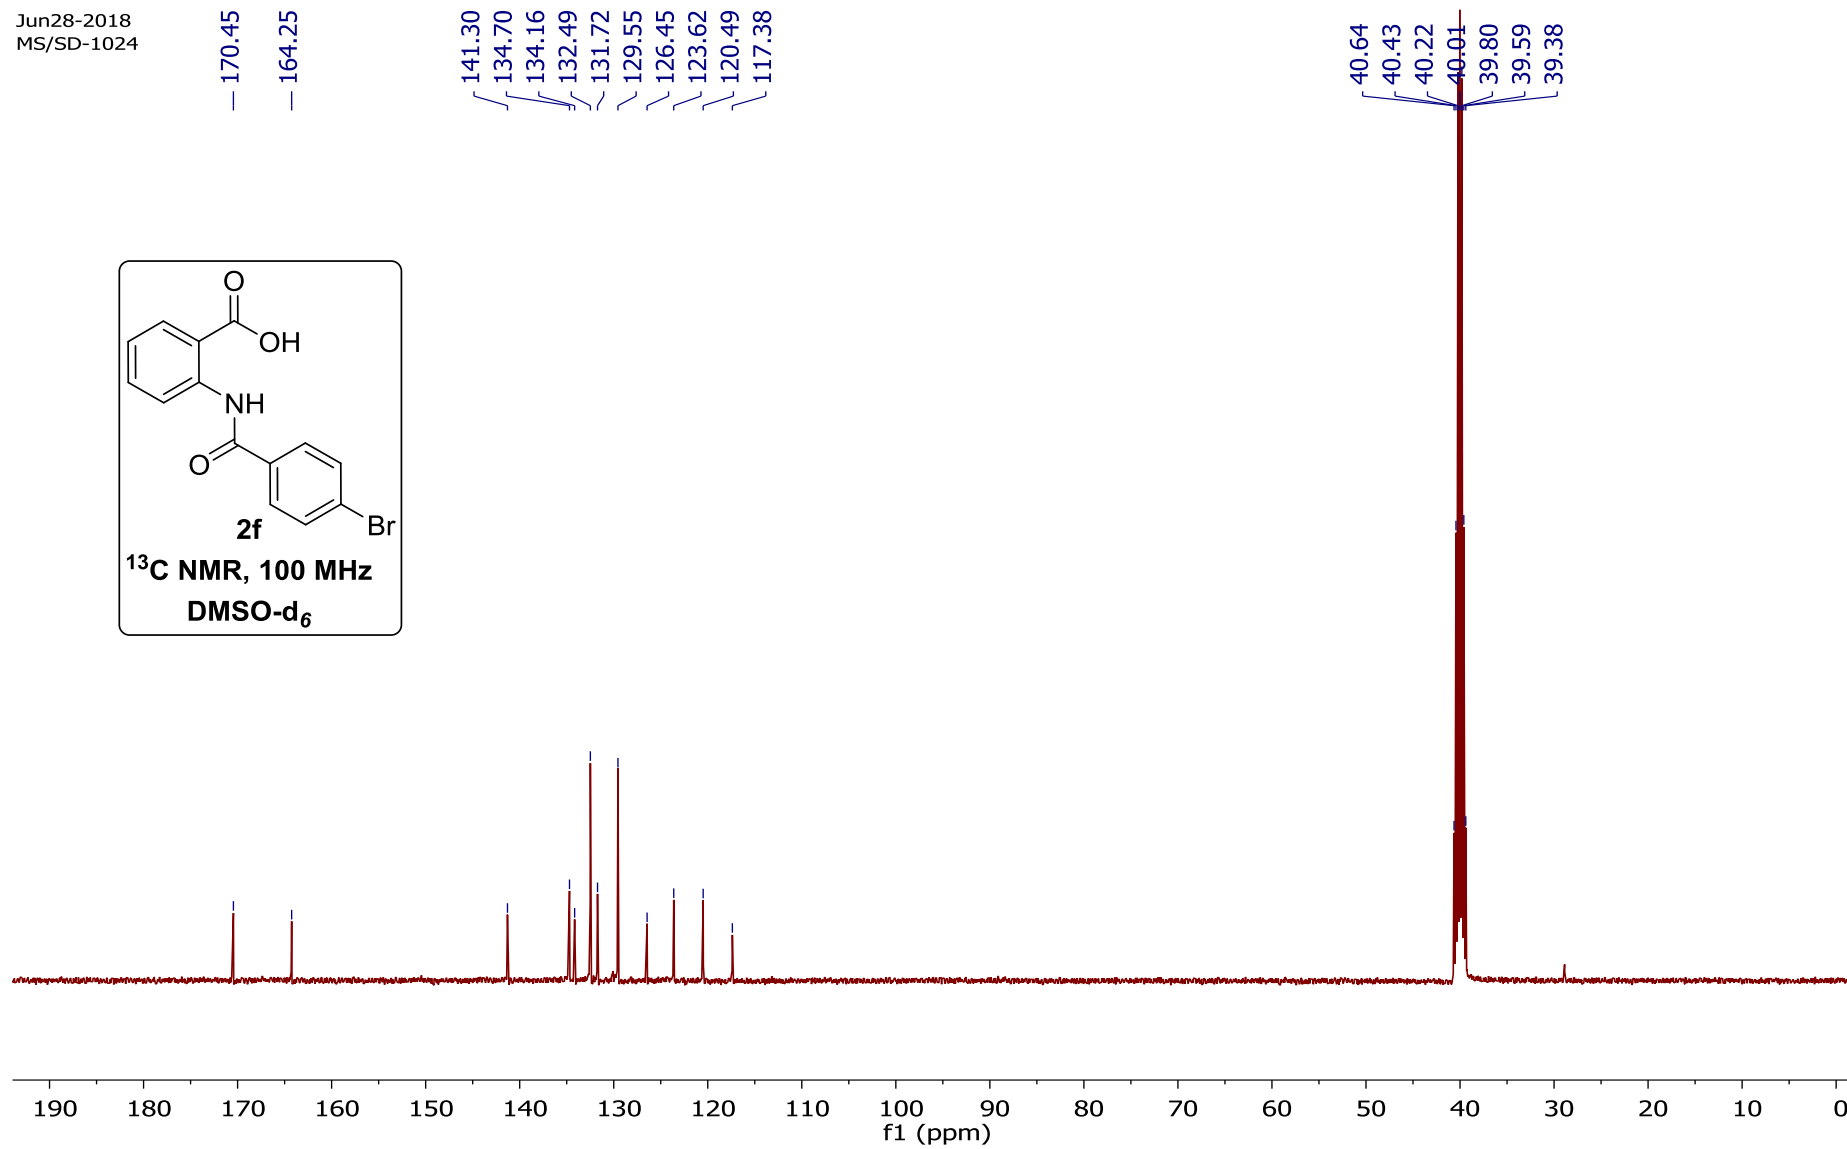

|               |              |             |                      |                 |              |                        |                        |
|---------------|--------------|-------------|----------------------|-----------------|--------------|------------------------|------------------------|
| Sample Name   | MS-SD-1024   | Position    | P2-E11               | Instrument Name | Instrument 1 | User Name              |                        |
| Inj Vol       | 0.25         | InjPosition |                      | SampleType      | Sample       | IRM Calibration Status | Success                |
| Data Filename | MS-SD-1024.d | ACQ Method  | ChB60ChA40Dual AJS E | Comment         |              | Acquired Time          | 10/29/2018 12:29:59 PM |

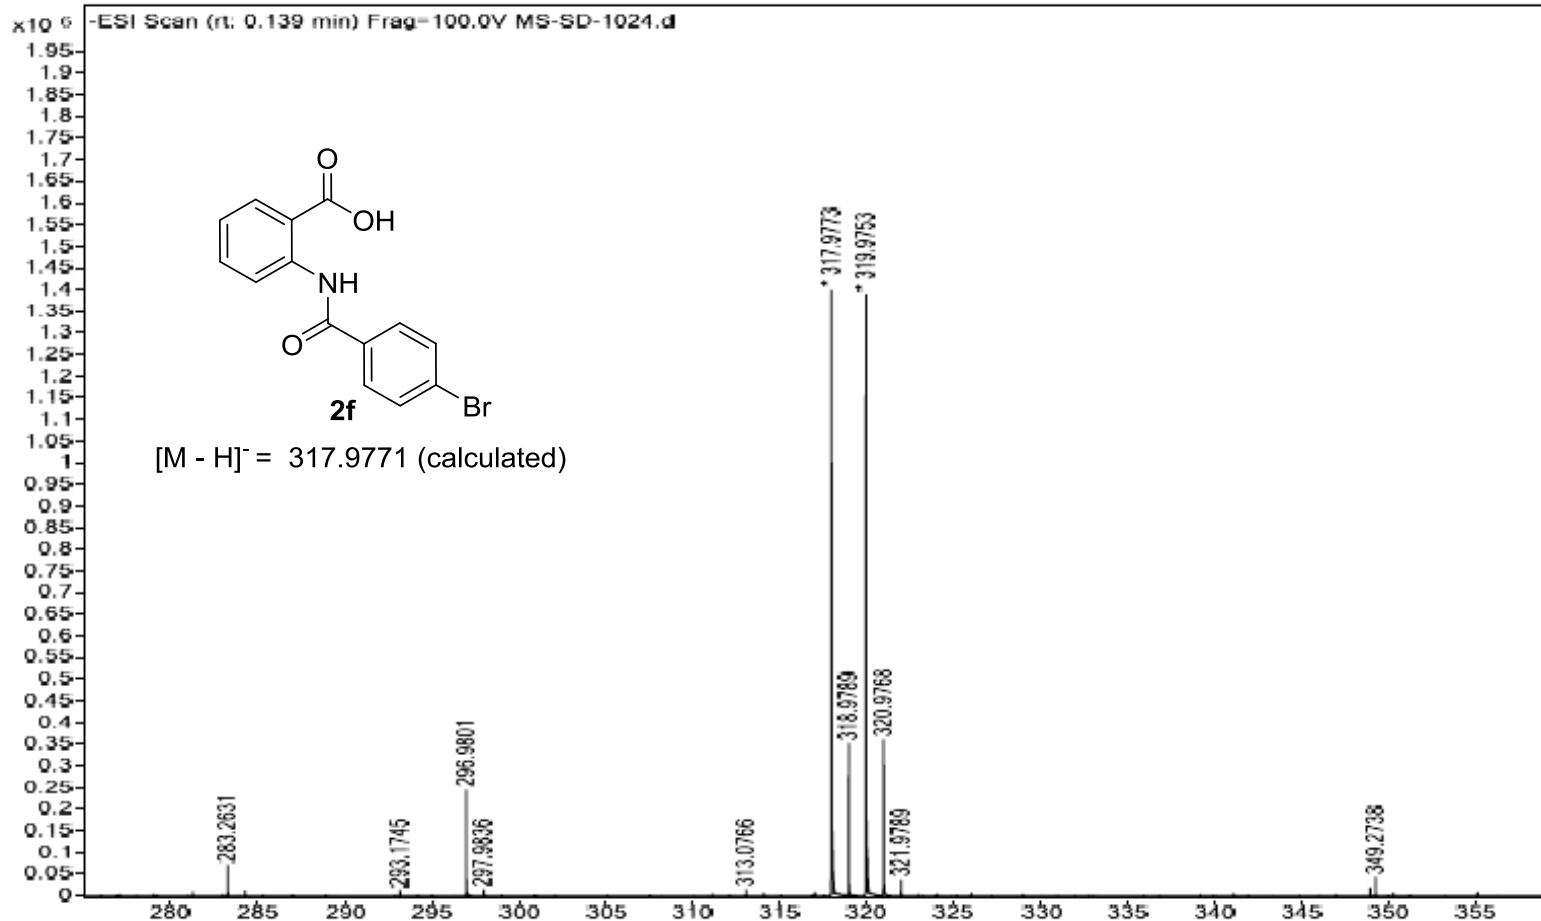

— 11.6242

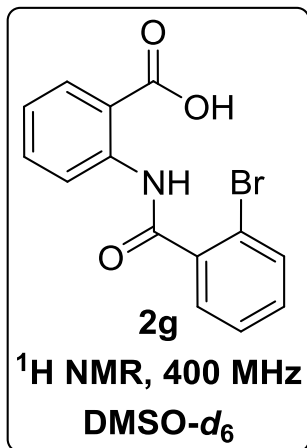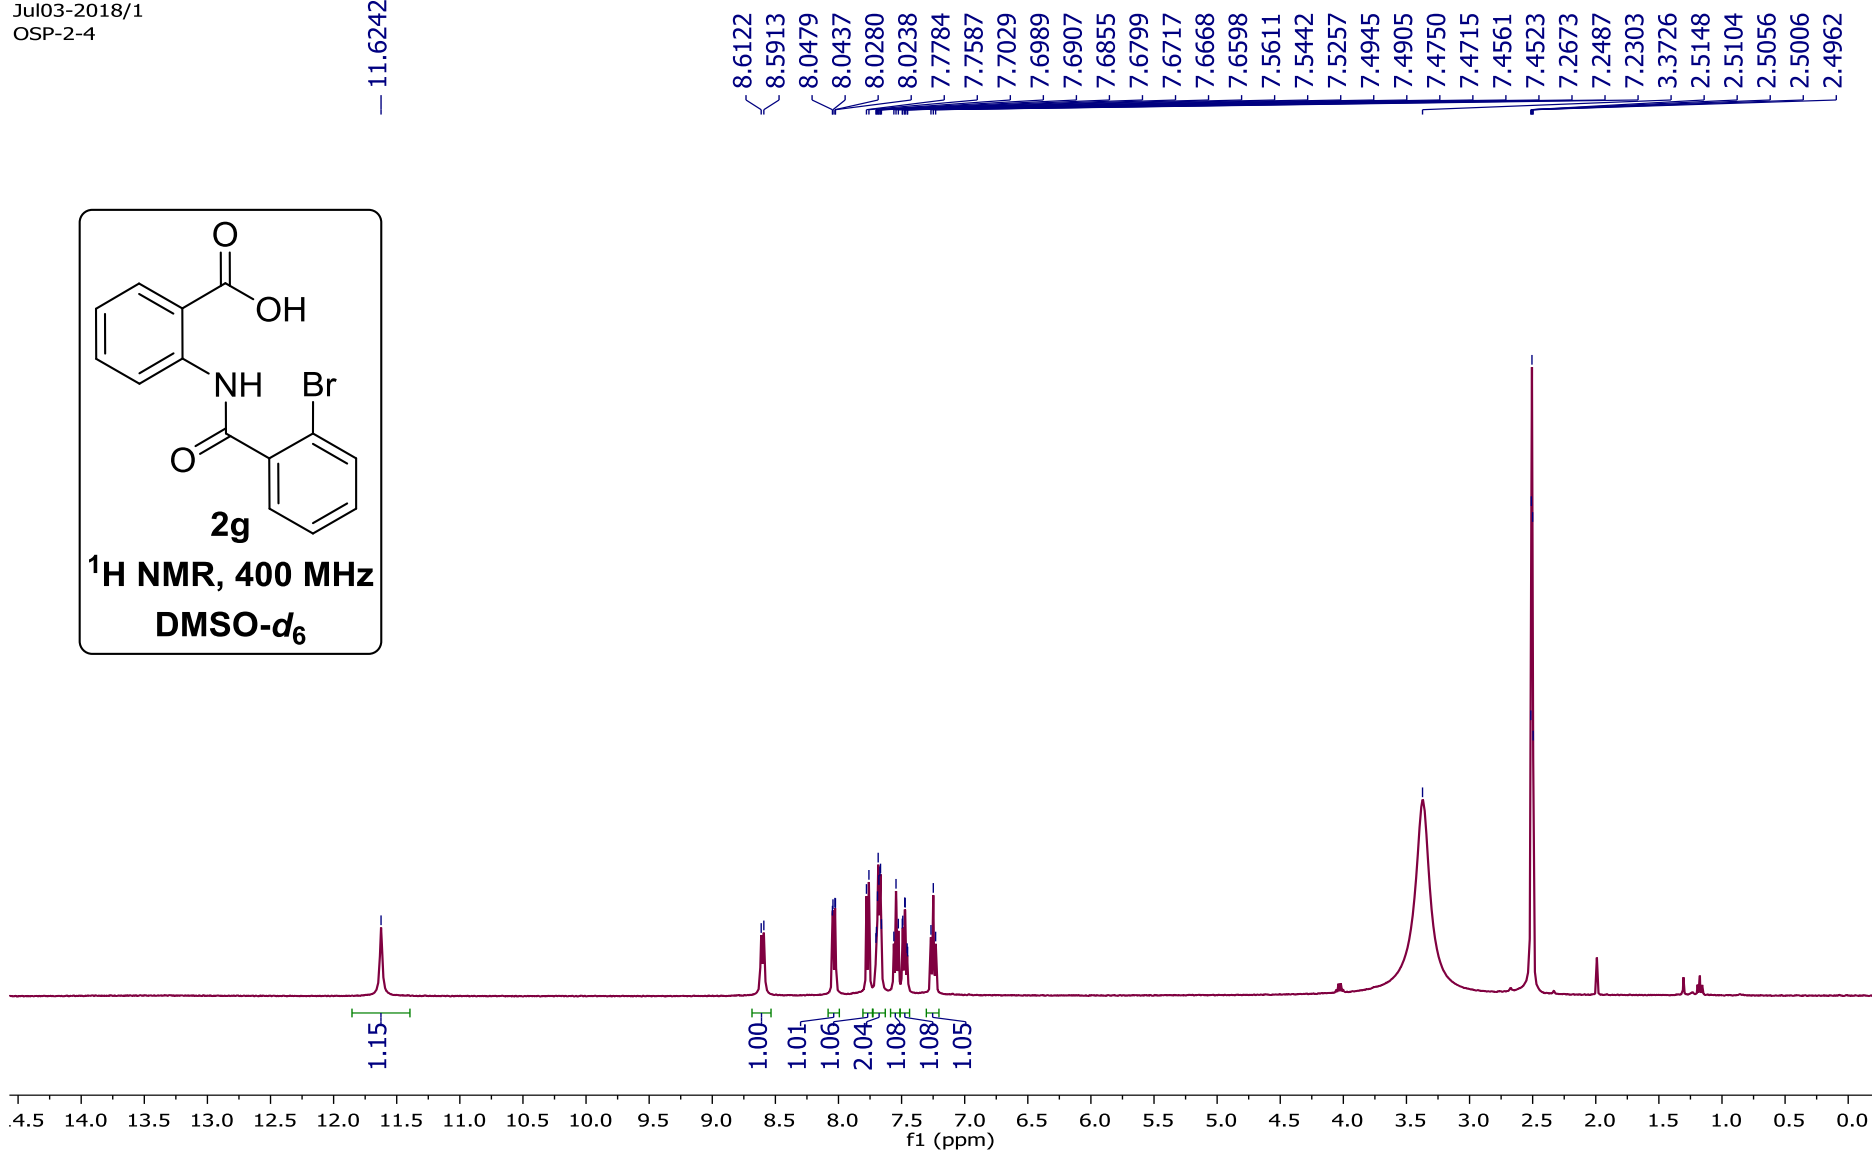

Jul03-2018/4  
OSP-2-4

— 169.95  
— 165.93

140.74  
138.79  
134.66  
133.79  
132.42  
131.70  
129.33  
128.58  
123.98  
120.57  
119.19  
117.76

40.58  
40.37  
40.17  
39.96  
39.75  
39.54  
39.33

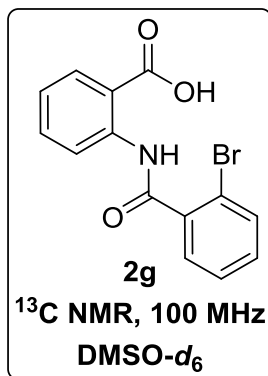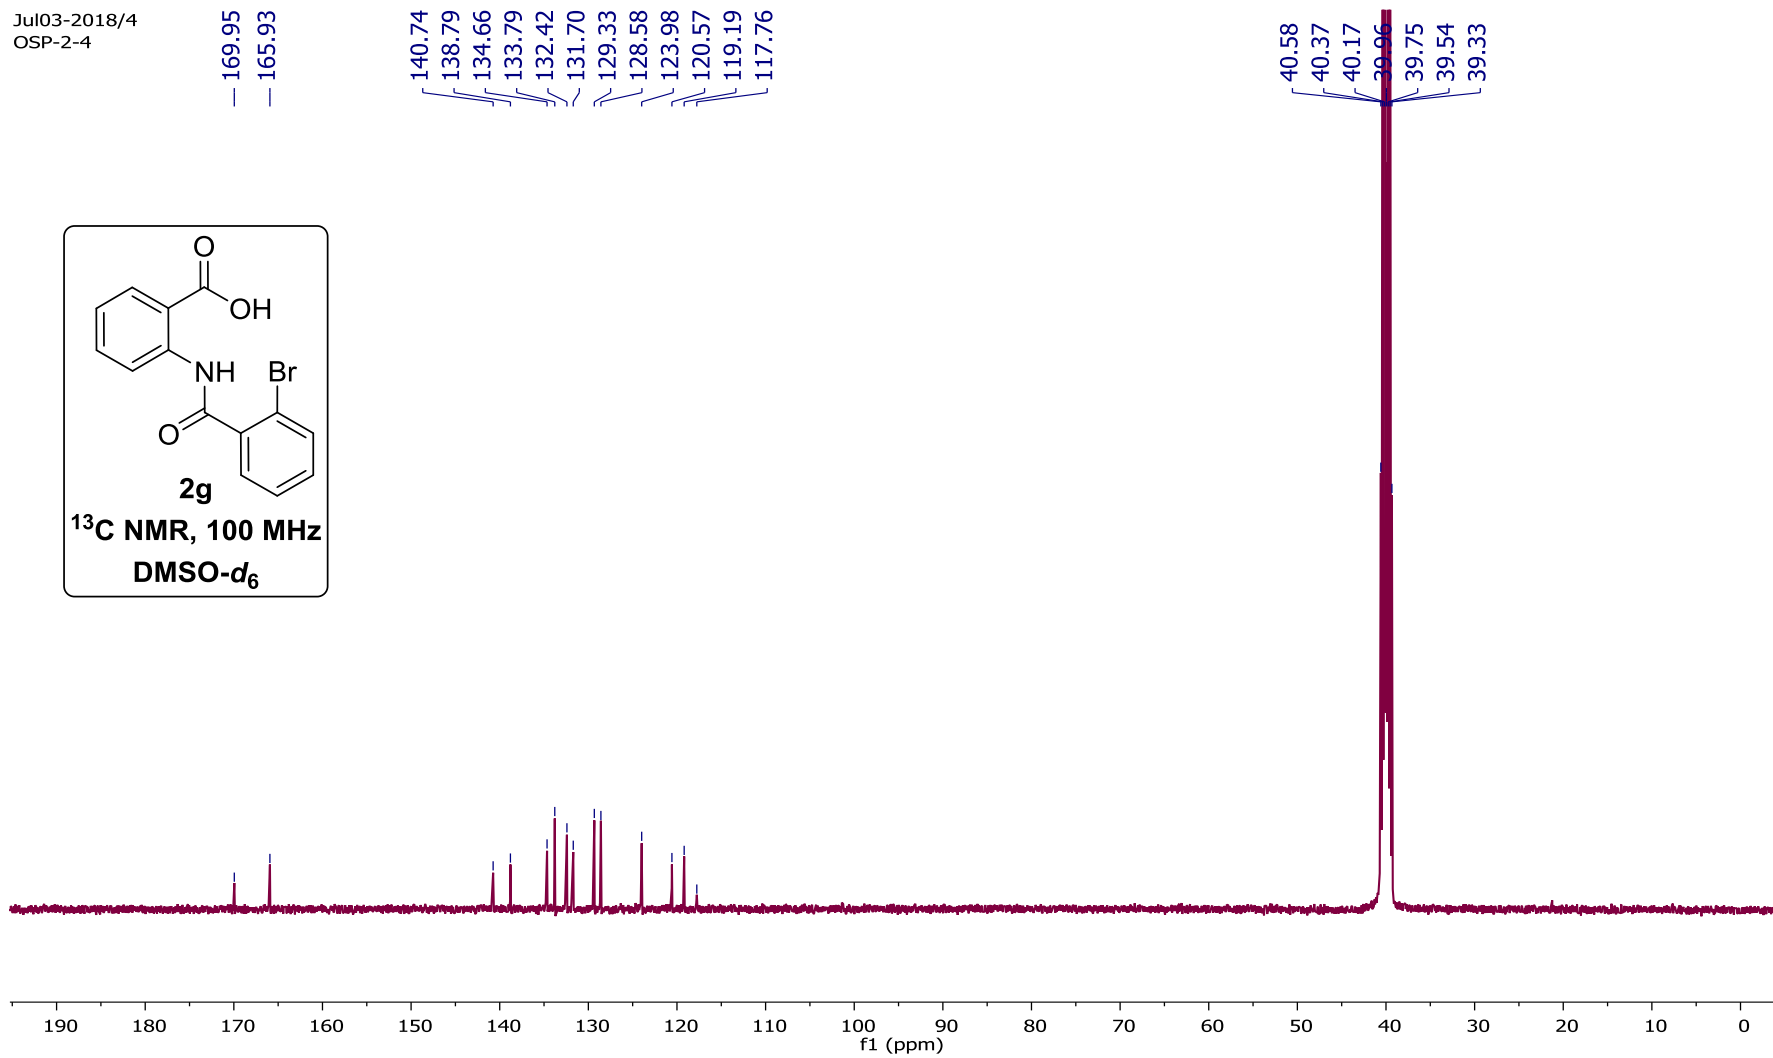

|               |           |             |                      |                 |              |                        |                        |
|---------------|-----------|-------------|----------------------|-----------------|--------------|------------------------|------------------------|
| Sample Name   | OSP-2-4   | Position    | P2-E4                | Instrument Name | Instrument 1 | User Name              |                        |
| Inj Vol       | 0.25      | InjPosition |                      | SampleType      | Sample       | IRM Calibration Status | Success                |
| Data Filename | OSP-2-4.d | ACQ Method  | ChB60ChA40Dual AJS E | Comment         |              | Acquired Time          | 10/29/2018 11:30:32 AM |

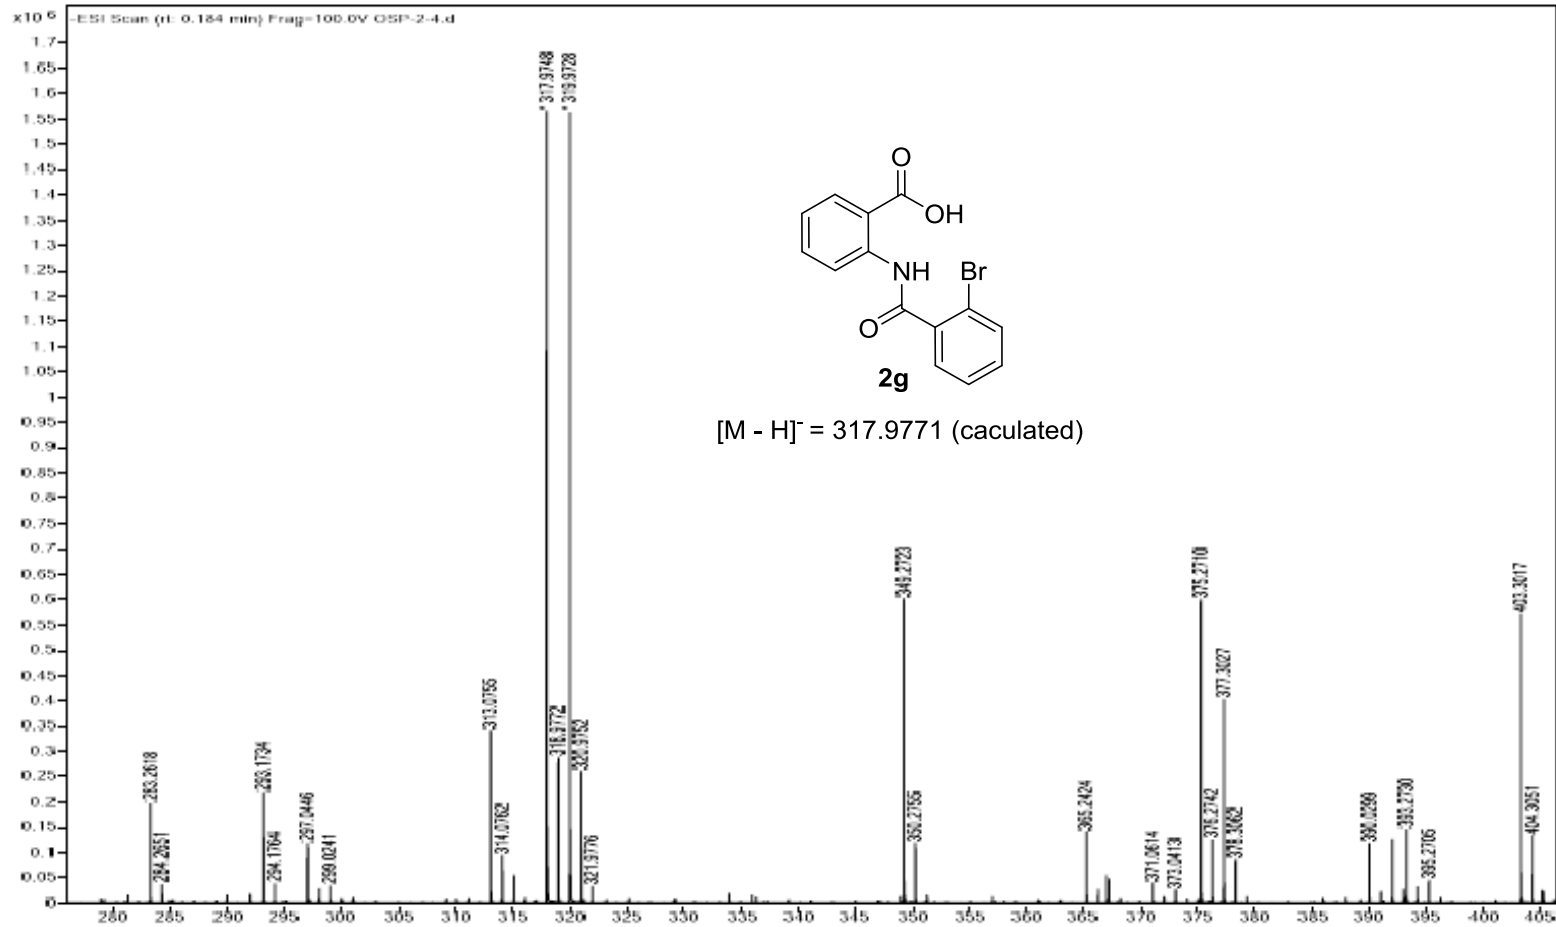

Apr02-2018  
MS/SD-1017

— 13.8284

— 12.2447

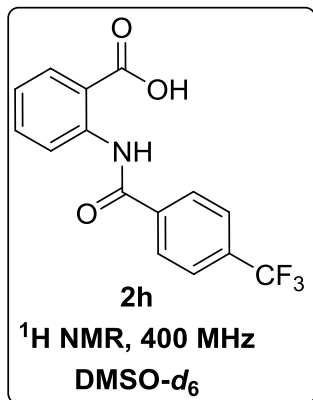

8.6666  
8.6459  
8.1508  
8.1306  
8.0705  
8.0534  
7.9822  
7.9618  
7.6983  
7.6776  
7.6593  
7.2590  
7.2400  
7.2215

2.5090  
2.5045  
2.4996  
2.4943  
2.4898

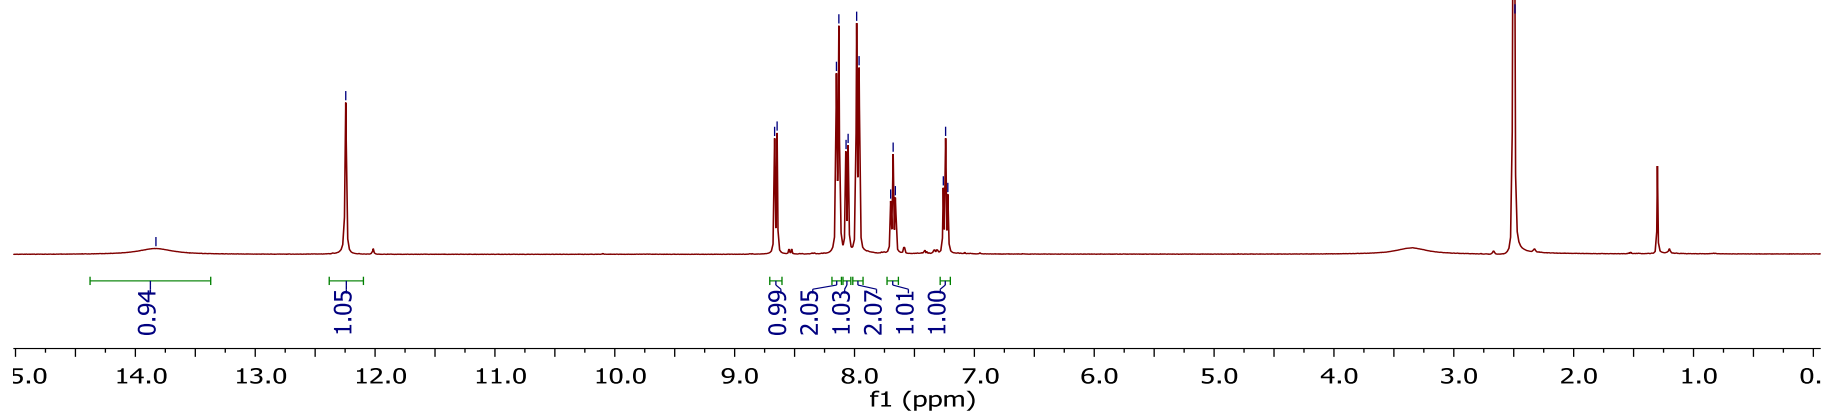



Apr02-2018  
MS/SD-1017

170.40  
163.97  
141.08  
138.79  
134.75  
132.80  
132.48  
132.16  
131.85  
131.73  
128.45  
126.53  
126.50  
126.46  
126.42  
125.64  
123.89  
122.93  
120.66  
117.60

40.64  
40.43  
40.22  
40.01  
39.80  
39.59  
39.38

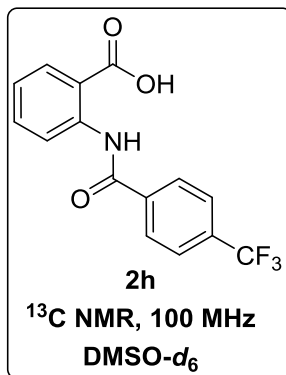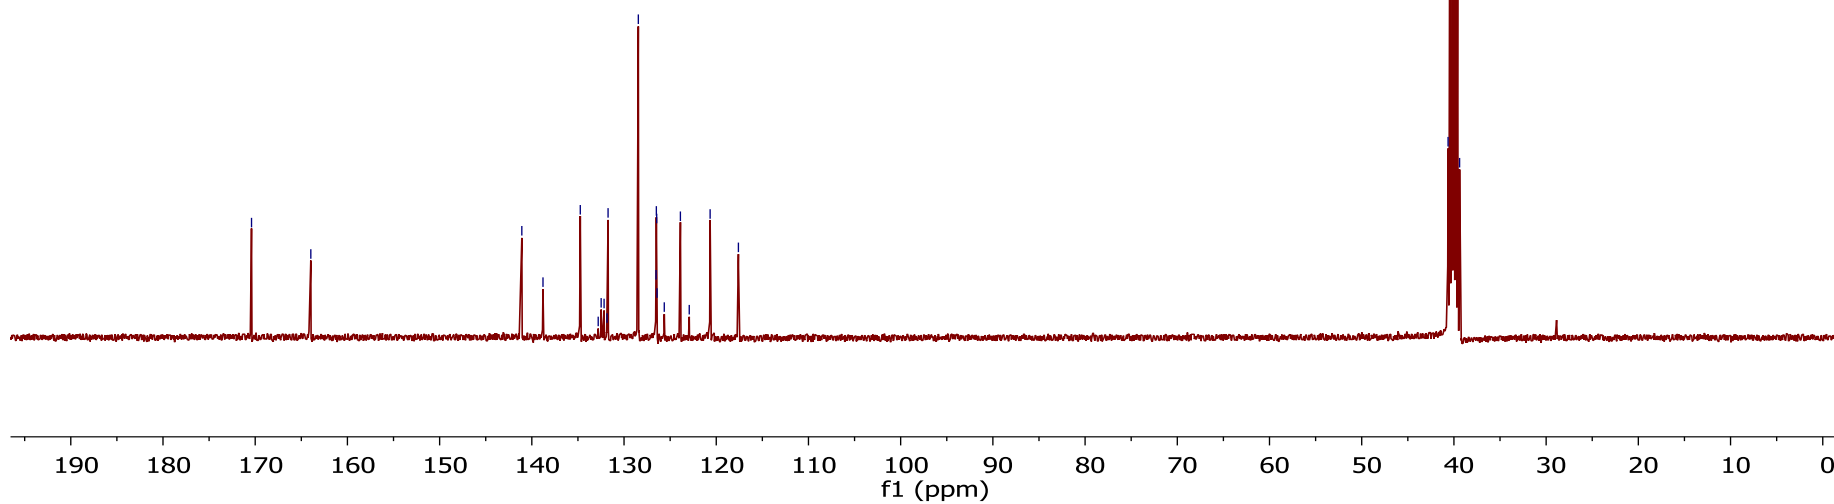

|               |              |             |                      |                 |              |                        |                     |
|---------------|--------------|-------------|----------------------|-----------------|--------------|------------------------|---------------------|
| Sample Name   | MS-SD-1017   | Position    | P1-B9                | Instrument Name | Instrument 1 | User Name              |                     |
| Inj Vol       | 0.25         | InjPosition |                      | SampleType      | Sample       | IRM Calibration Status | Success             |
| Data Filename | MS-SD-1017.d | ACQ Method  | ChB60ChD40Dual AJS E | Comment         |              | Acquired Time          | 1/2/2019 5:54:37 PM |

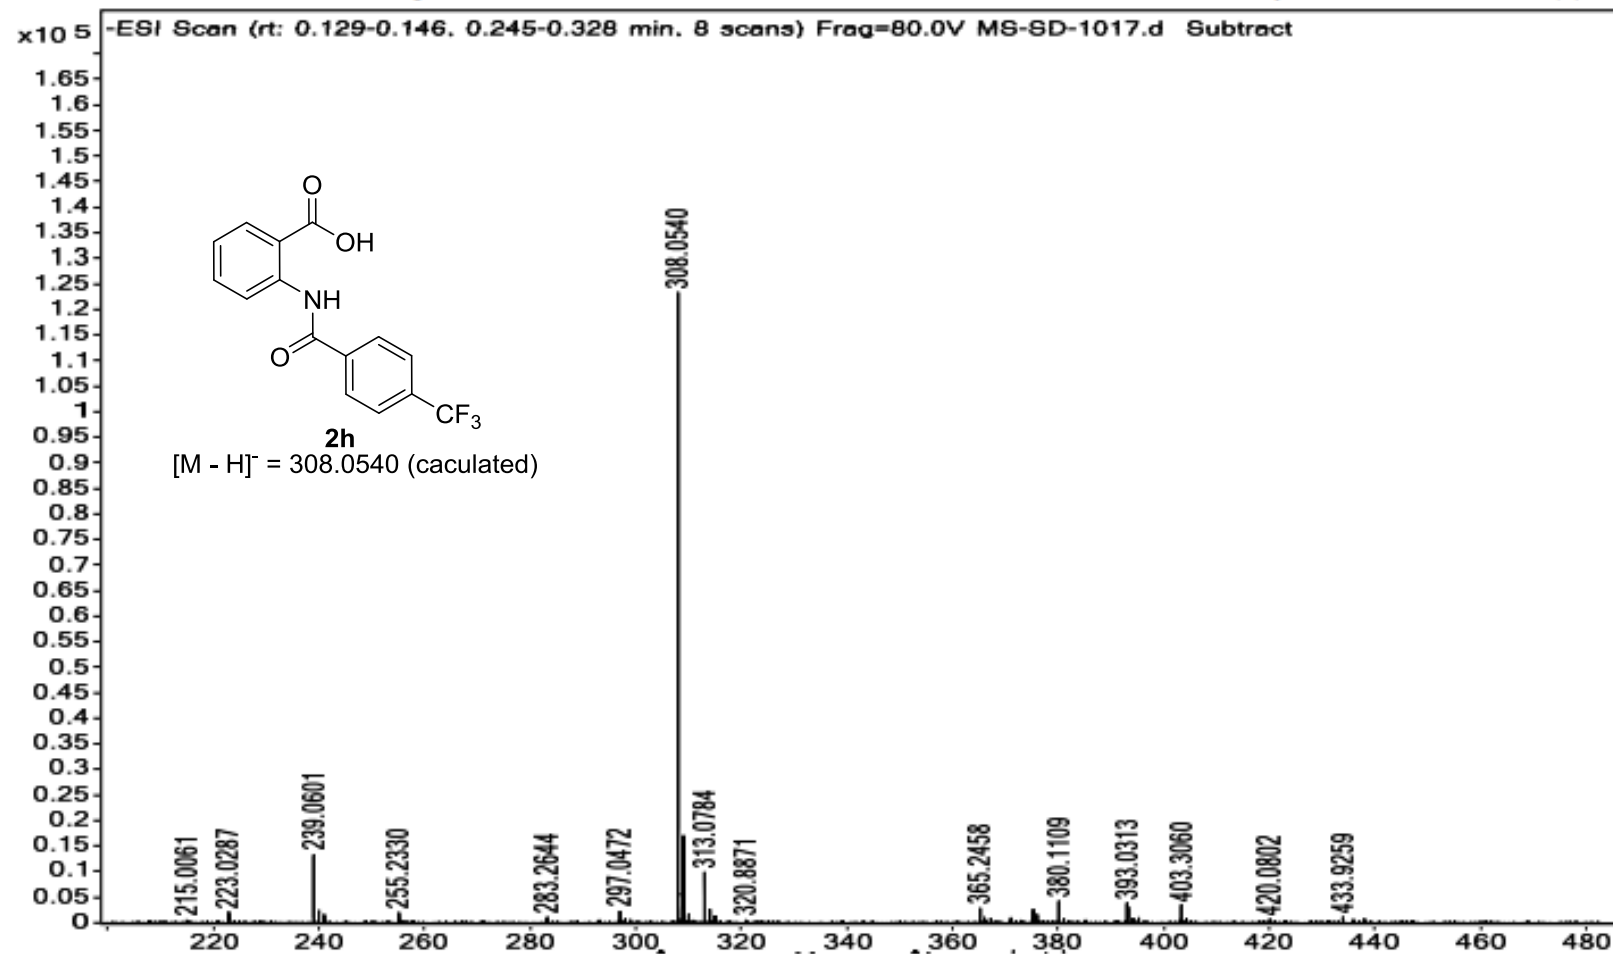

Nov28-2018/5  
OSP-2-38

— 12.3245

8.6509  
8.6301  
8.2388  
8.0581  
8.0383  
8.0121  
7.9931  
7.8501  
7.8305  
7.8107  
7.6783  
7.6589  
7.6393  
7.2415  
7.2226  
7.2037

— 2.4998

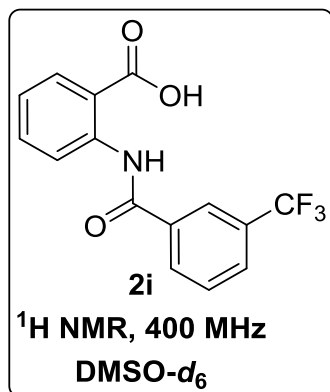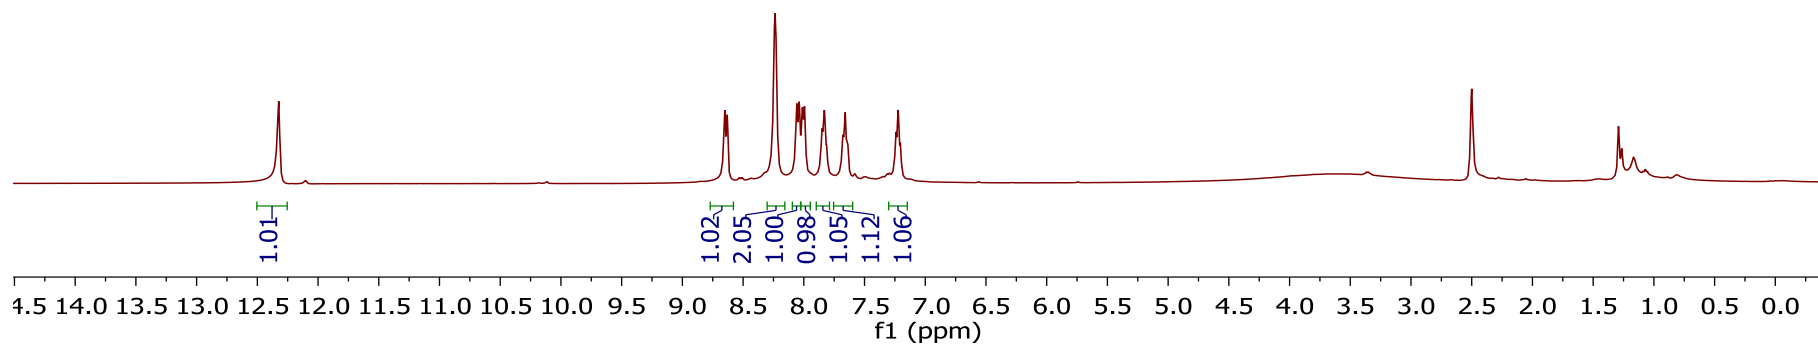

Nov28-2018/11  
OSP-2-38

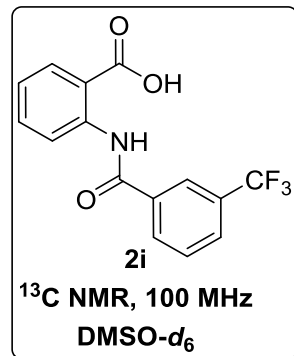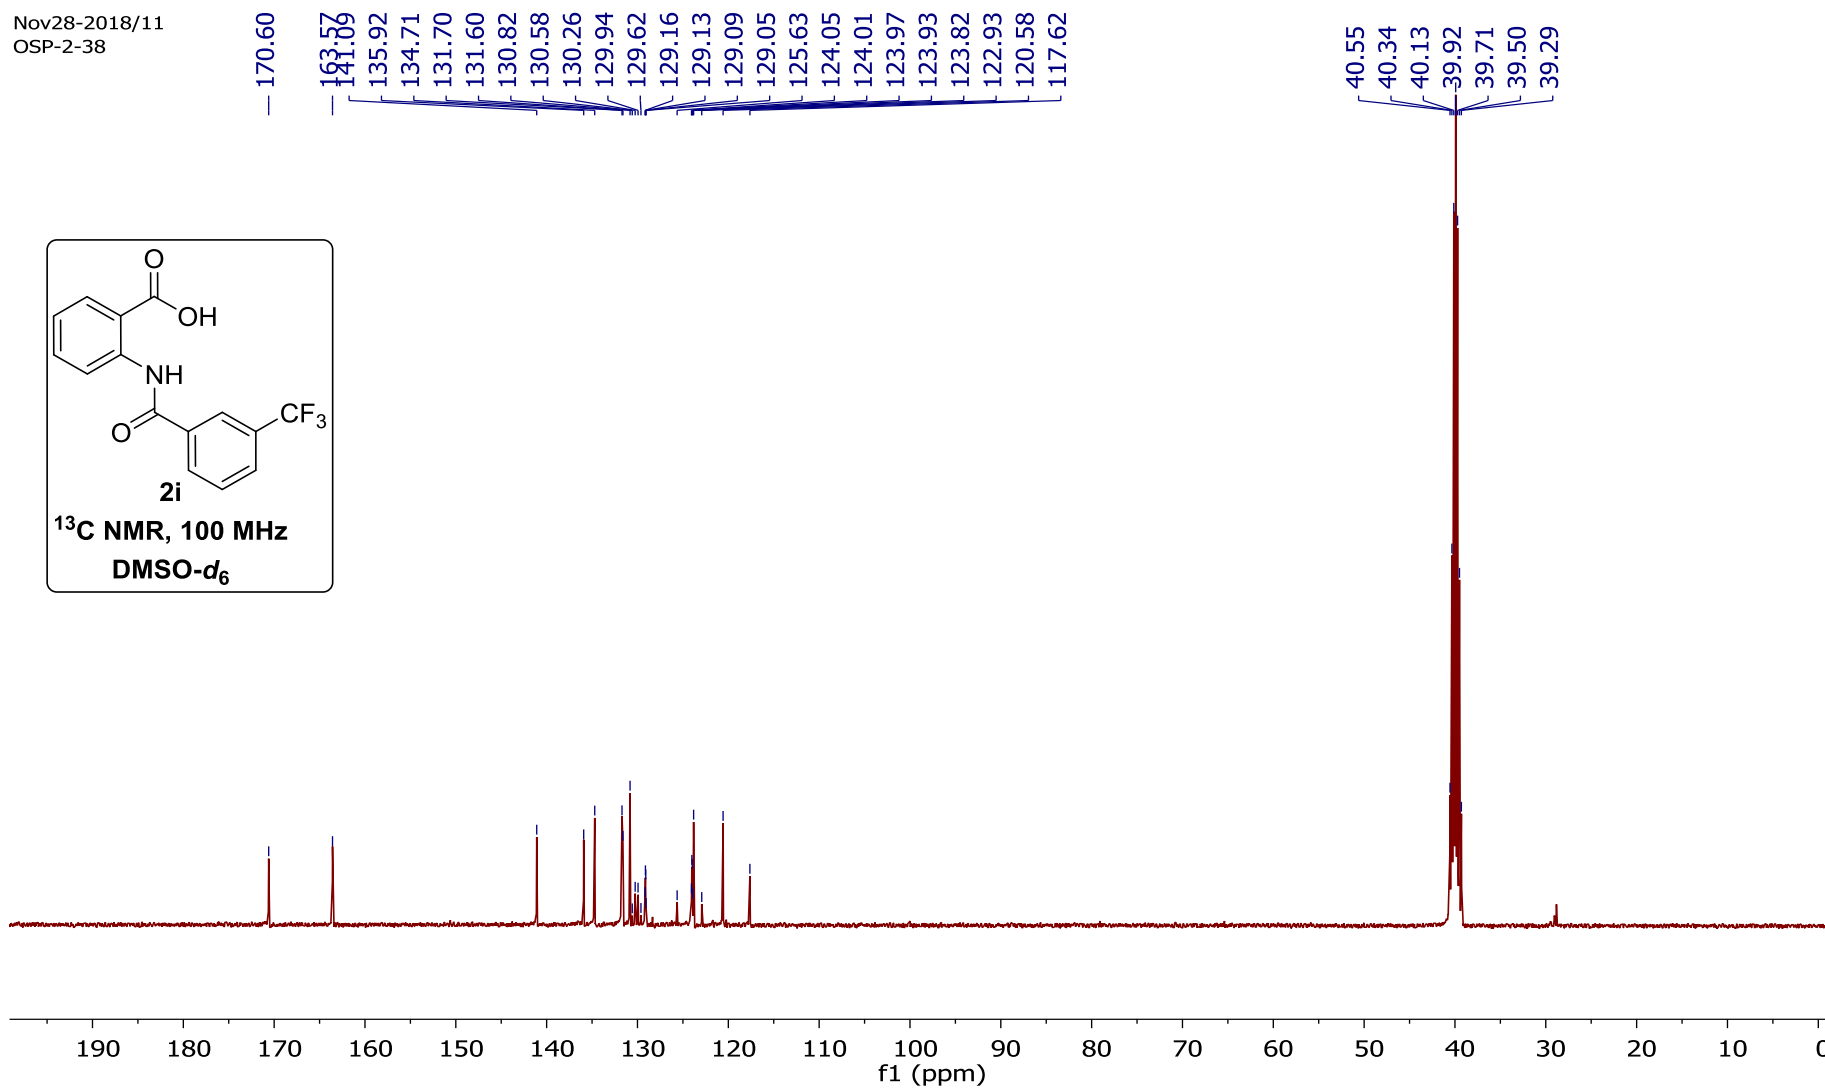

|               |            |             |                      |                 |              |                        |                        |
|---------------|------------|-------------|----------------------|-----------------|--------------|------------------------|------------------------|
| Sample Name   | OSP-2-38   | Position    | P2-E8                | Instrument Name | Instrument 1 | User Name              |                        |
| Inj Vol       | 0.25       | InjPosition |                      | SampleType      | Sample       | IRM Calibration Status | Success                |
| Data Filename | OSP-2-38.d | ACQ Method  | ChB60ChA40Dual AJS E | Comment         |              | Acquired Time          | 10/29/2018 12:05:17 PM |

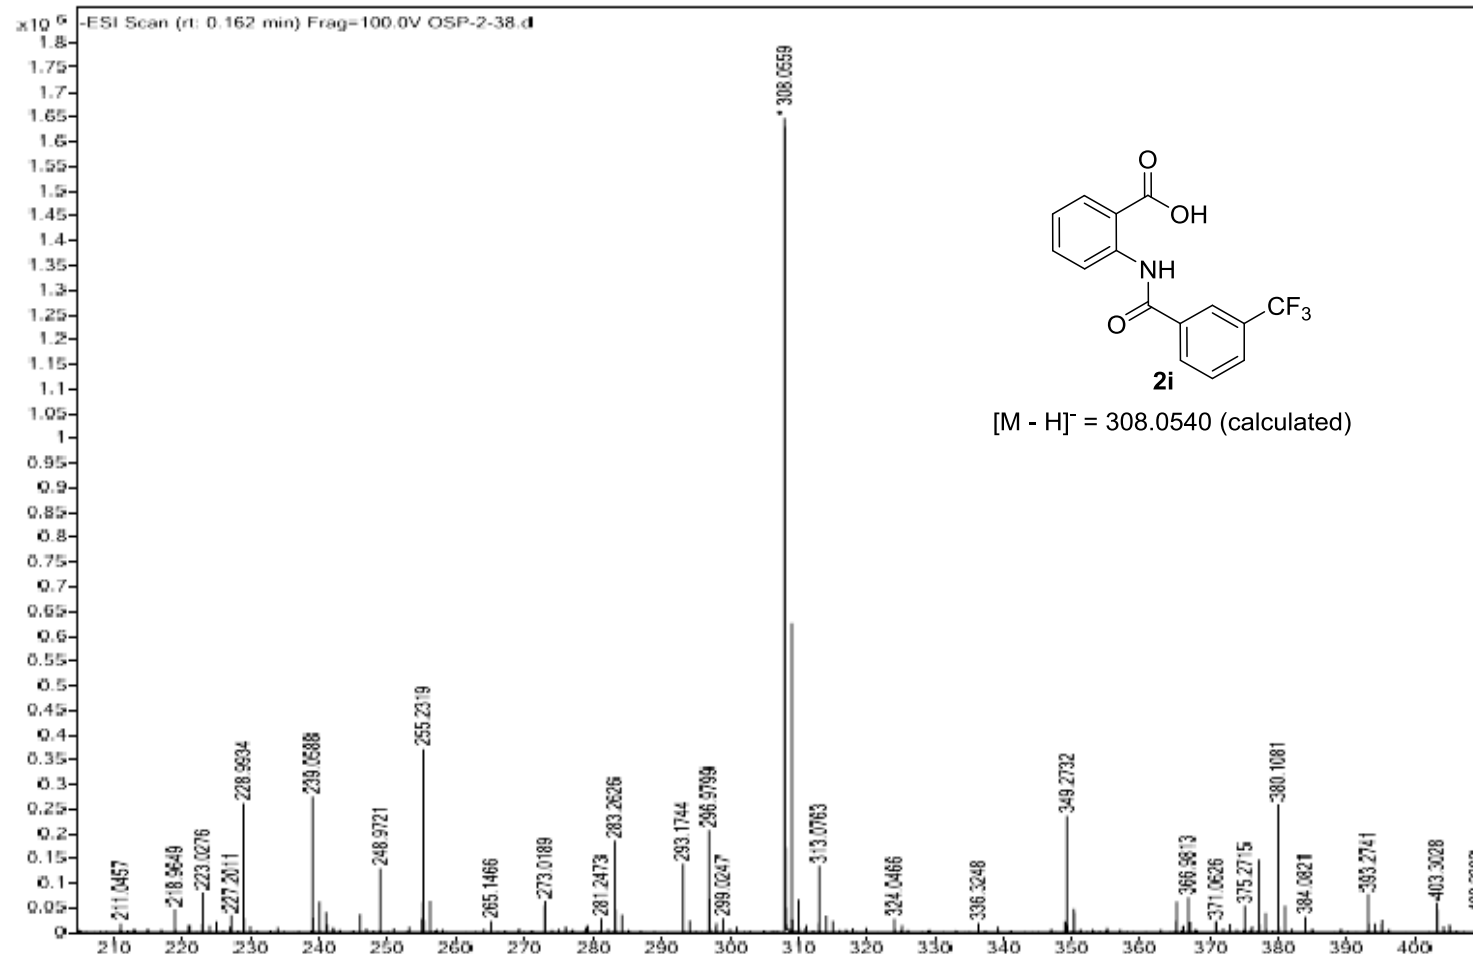

Nov28-2018/3  
OSP-2-37

— 11.9754

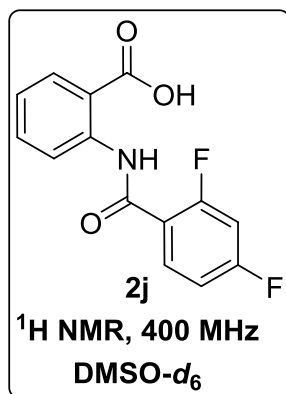

8.6793  
8.6582  
8.0450  
8.0255  
8.0066  
7.9870  
7.9665  
7.6612  
7.6415  
7.6217  
7.4812  
7.4550  
7.4289  
7.2895  
7.2678  
7.2469  
7.2350  
7.2155  
7.1964

— 2.4995

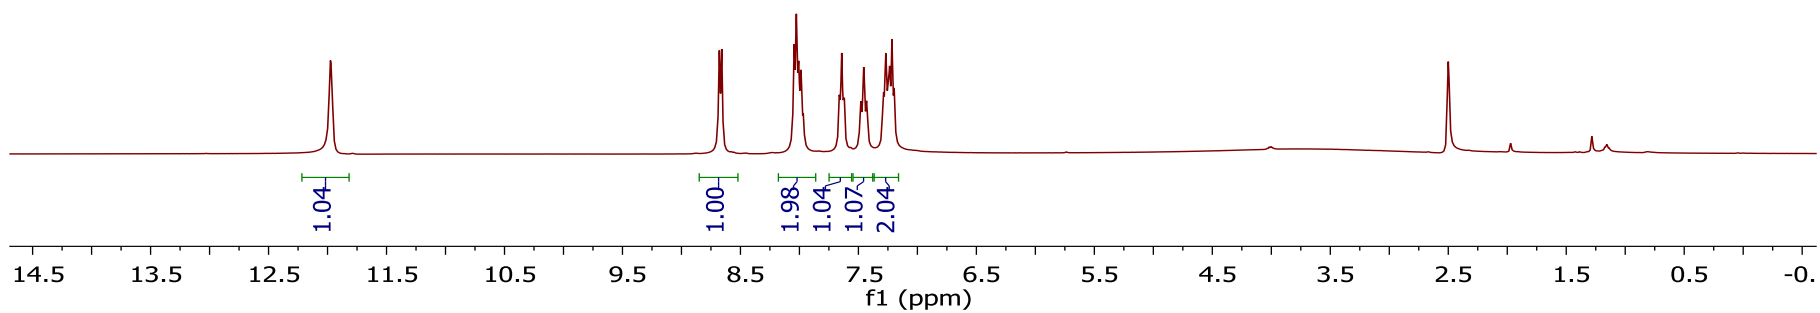

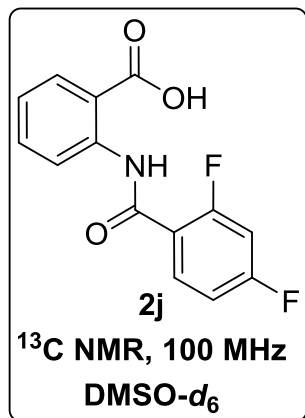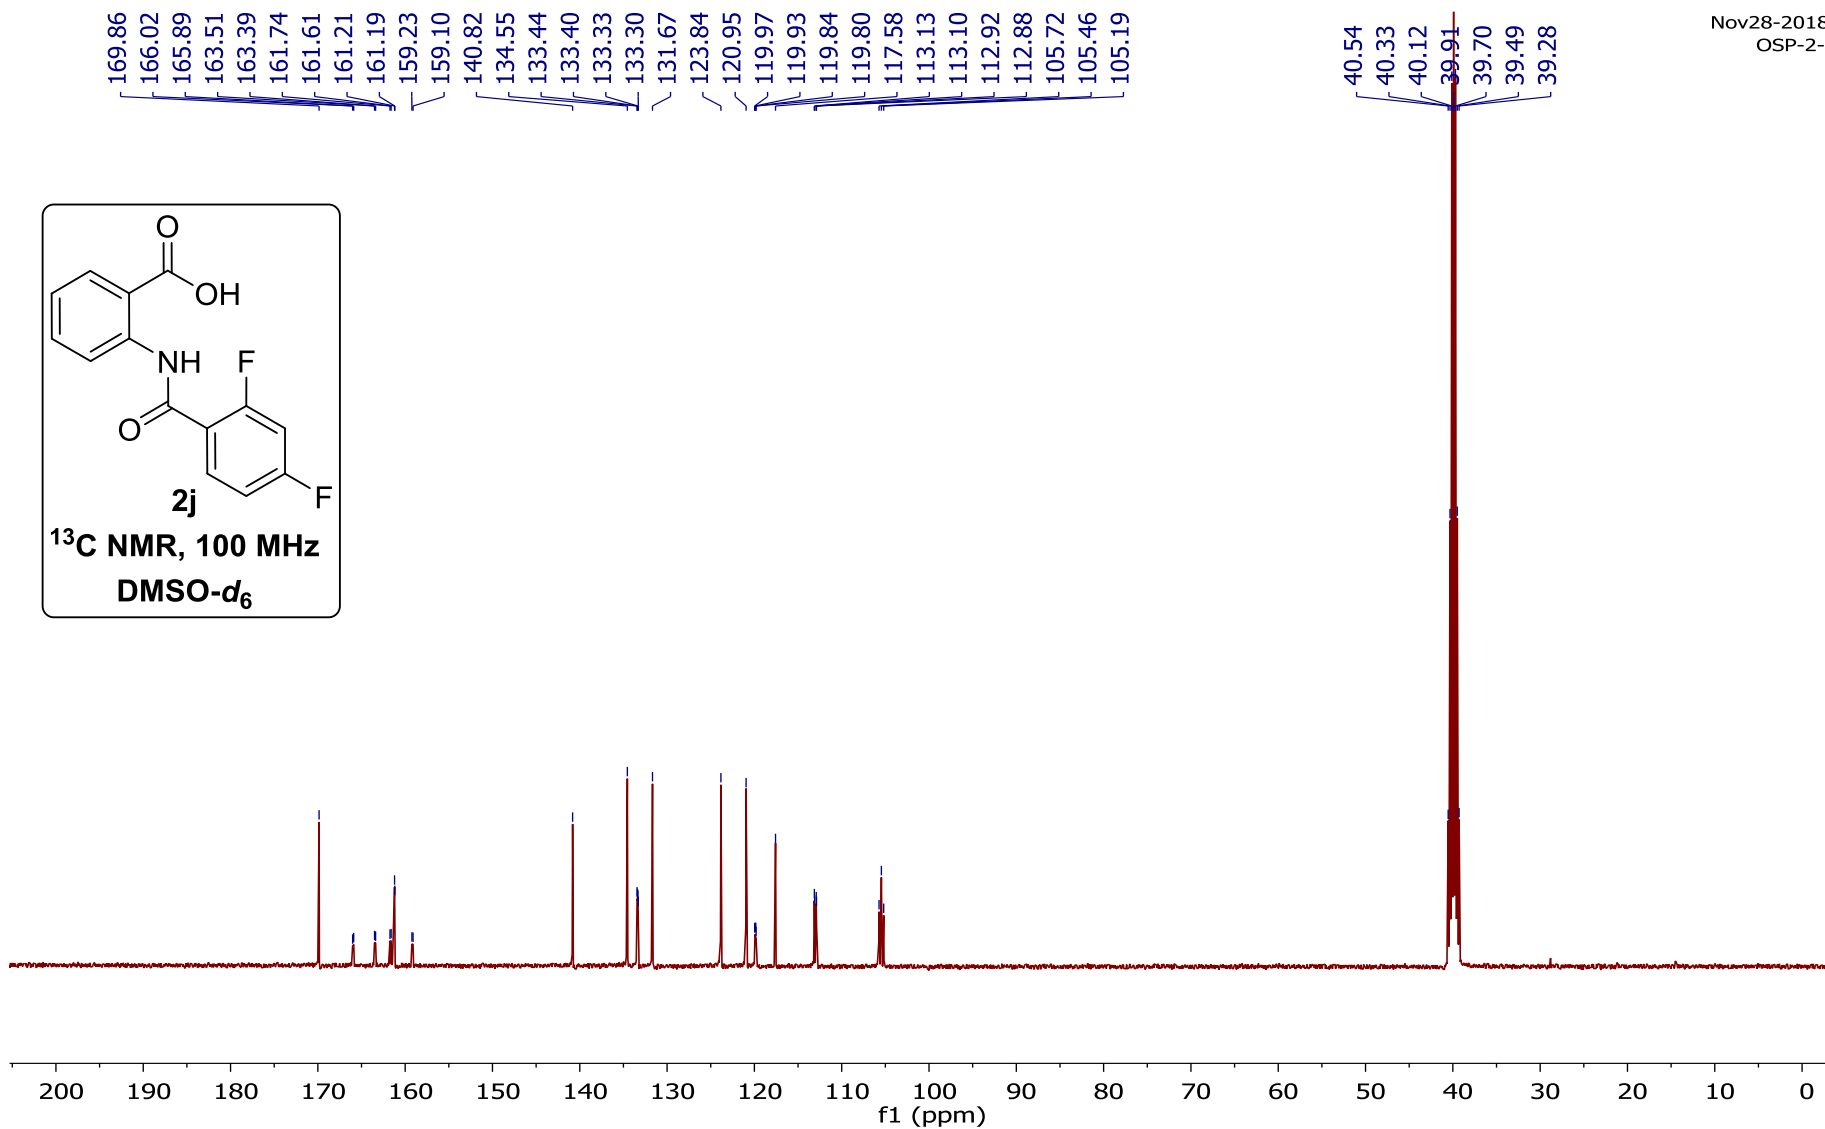

|               |            |             |                      |                 |              |                        |                        |
|---------------|------------|-------------|----------------------|-----------------|--------------|------------------------|------------------------|
| Sample Name   | OSP-2-37   | Position    | P2-E7                | Instrument Name | Instrument 1 | User Name              |                        |
| Inj Vol       | 0.25       | InjPosition |                      | SampleType      | Sample       | IRM Calibration Status | Success                |
| Data Filename | OSP-2-37.d | ACQ Method  | ChB60ChA40Dual AJS E | Comment         |              | Acquired Time          | 10/29/2018 11:57:03 AM |

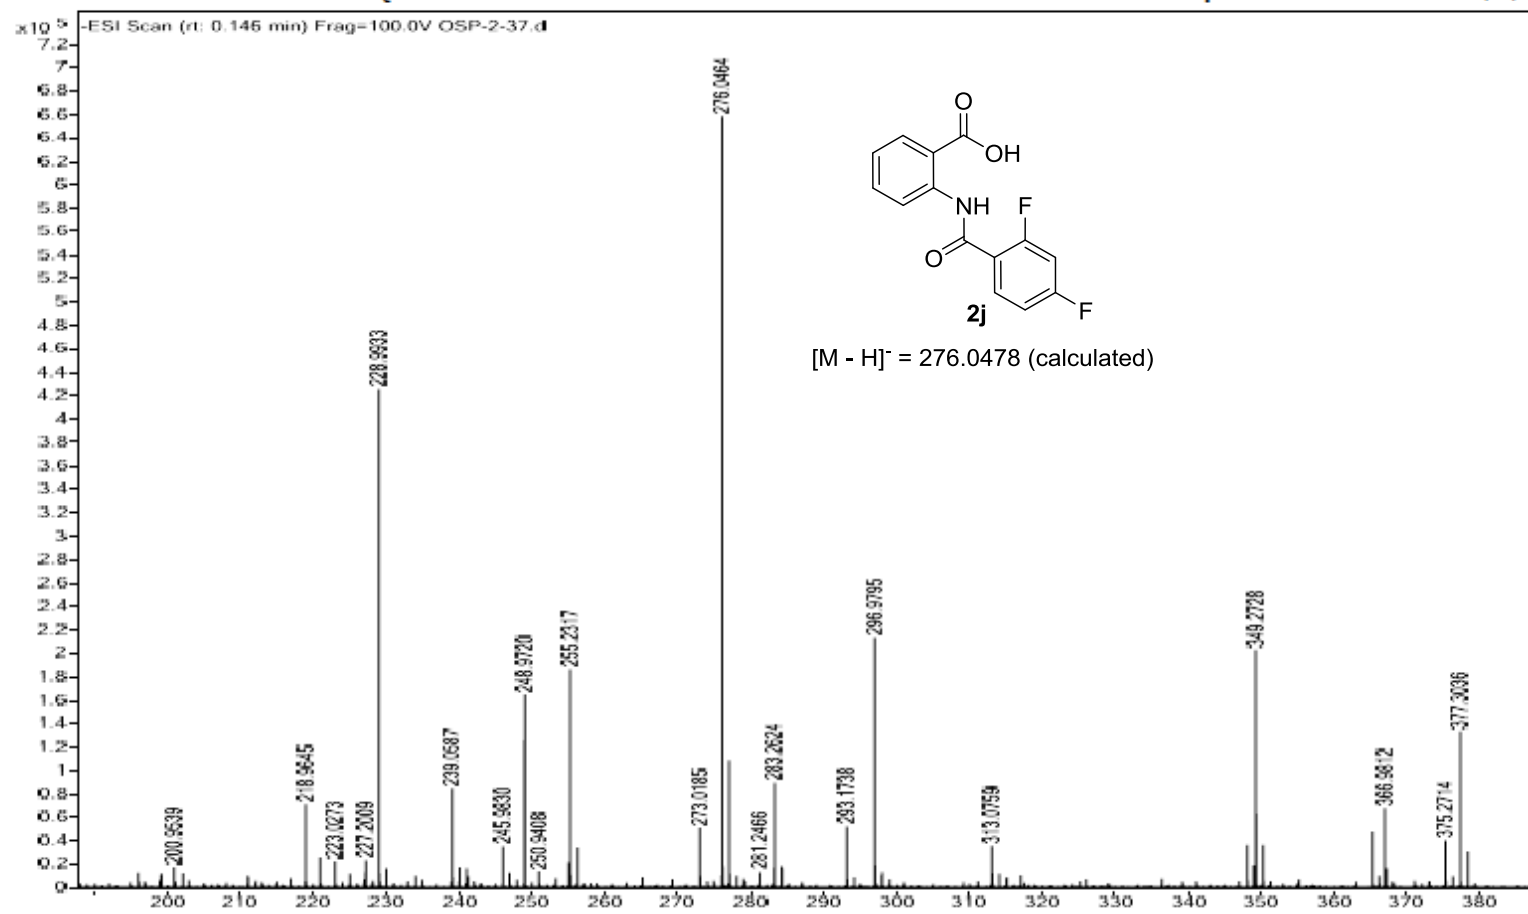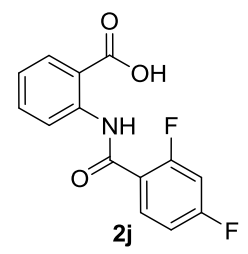

[M - H]<sup>-</sup> = 276.0478 (calculated)



Jun09-2018  
MS-SD-1022

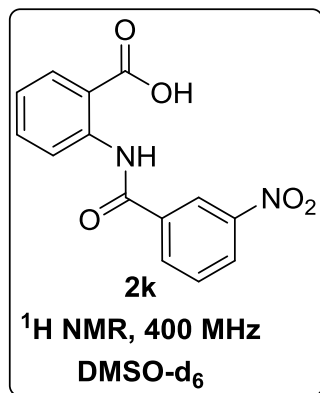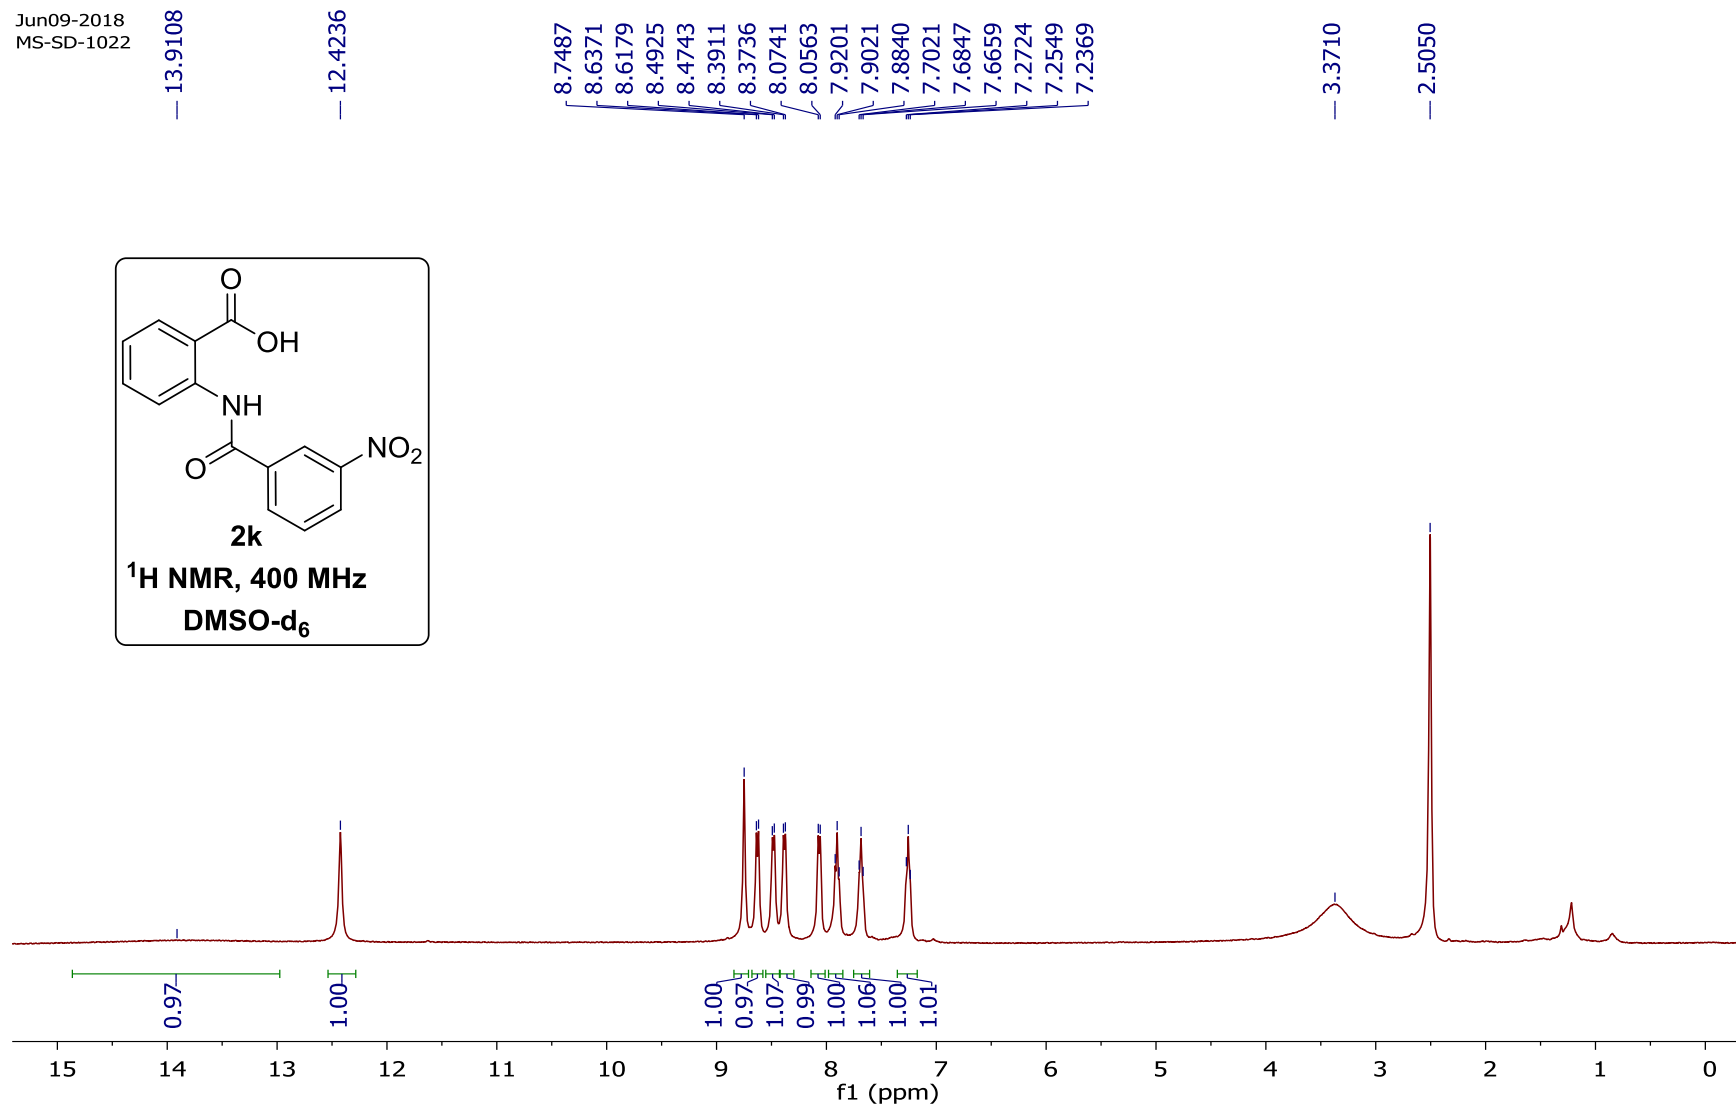

Jun09-2018  
MS-SD-1022

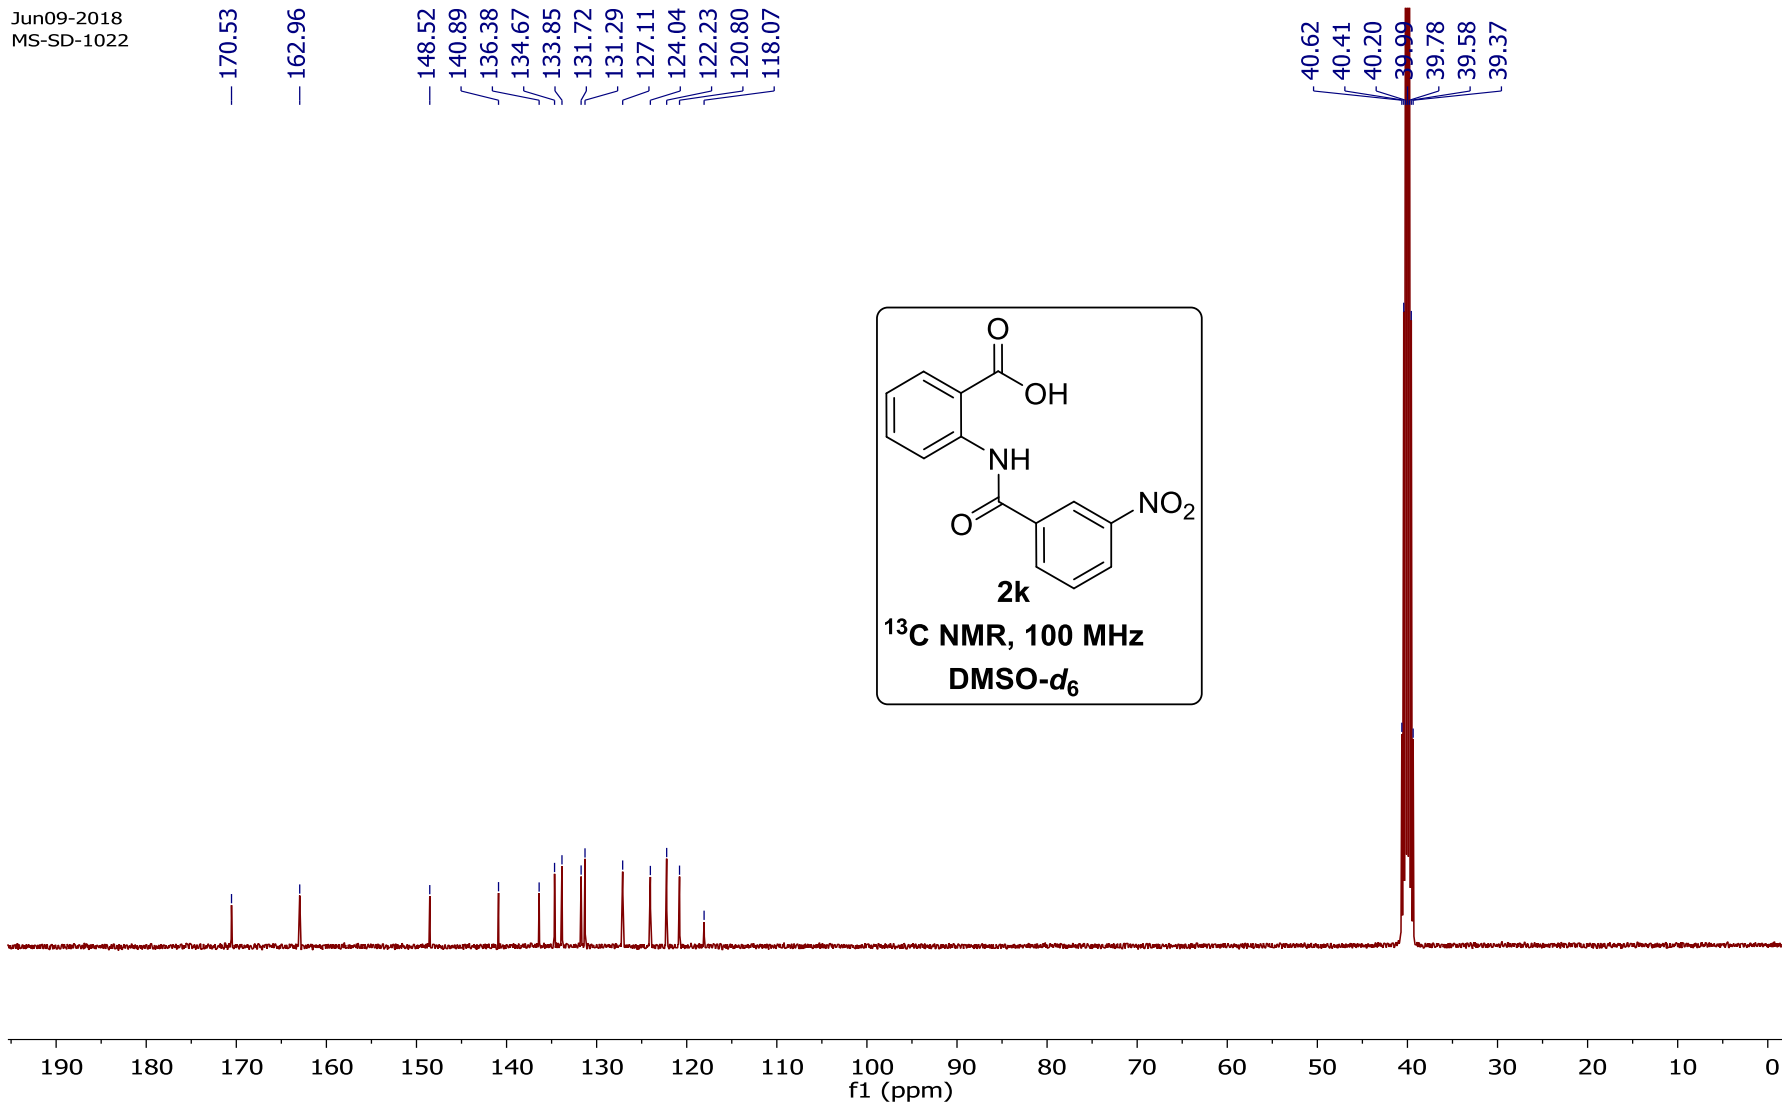

|               |              |             |                      |                 |              |                        |                        |
|---------------|--------------|-------------|----------------------|-----------------|--------------|------------------------|------------------------|
| Sample Name   | MS-SD-1022   | Position    | P2-F2                | Instrument Name | Instrument 1 | User Name              |                        |
| Inj Vol       | 0.25         | InjPosition |                      | SampleType      | Sample       | IRM Calibration Status | Success                |
| Data Filename | MS-SD-1022.d | ACQ Method  | ChB60ChA40Dual AJS E | Comment         |              | Acquired Time          | 10/29/2018 12:46:39 PM |

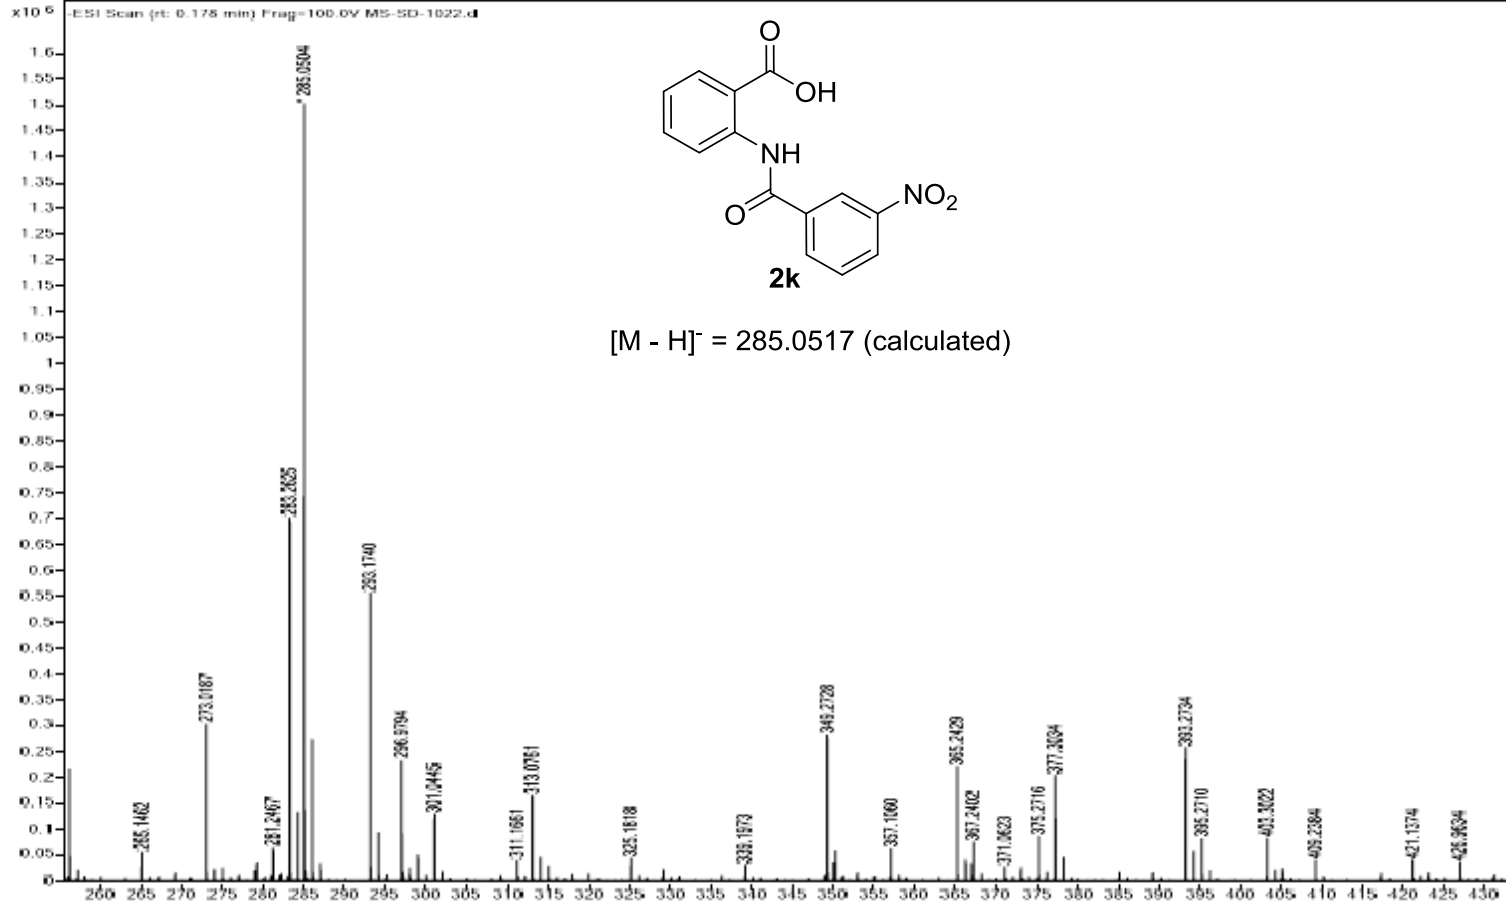

May18-2018  
MS/SD-1020

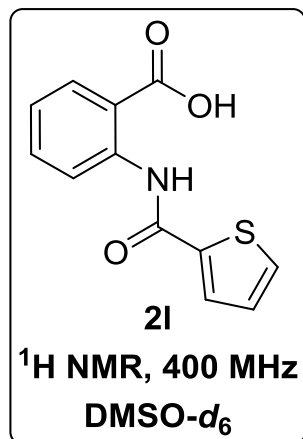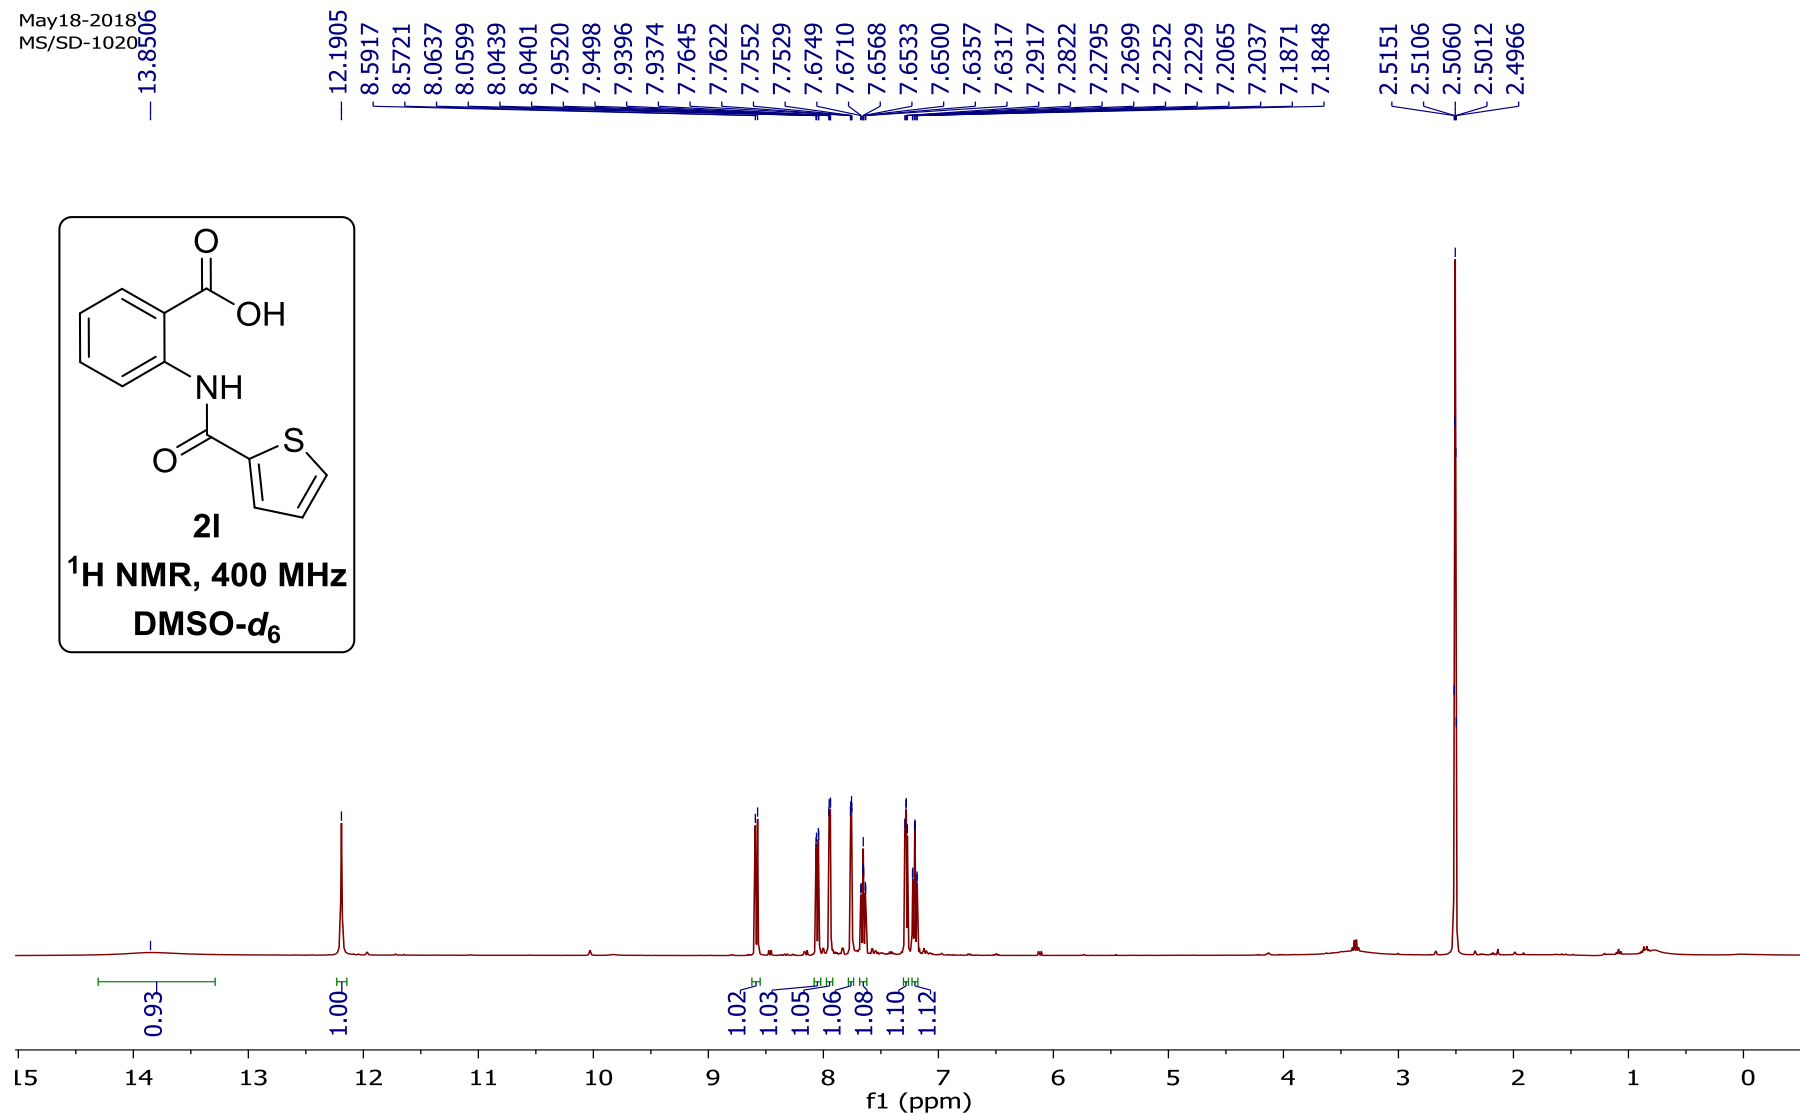

May18-2018  
MS/SD-1020

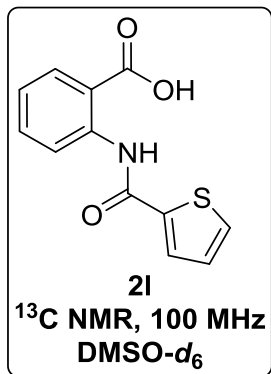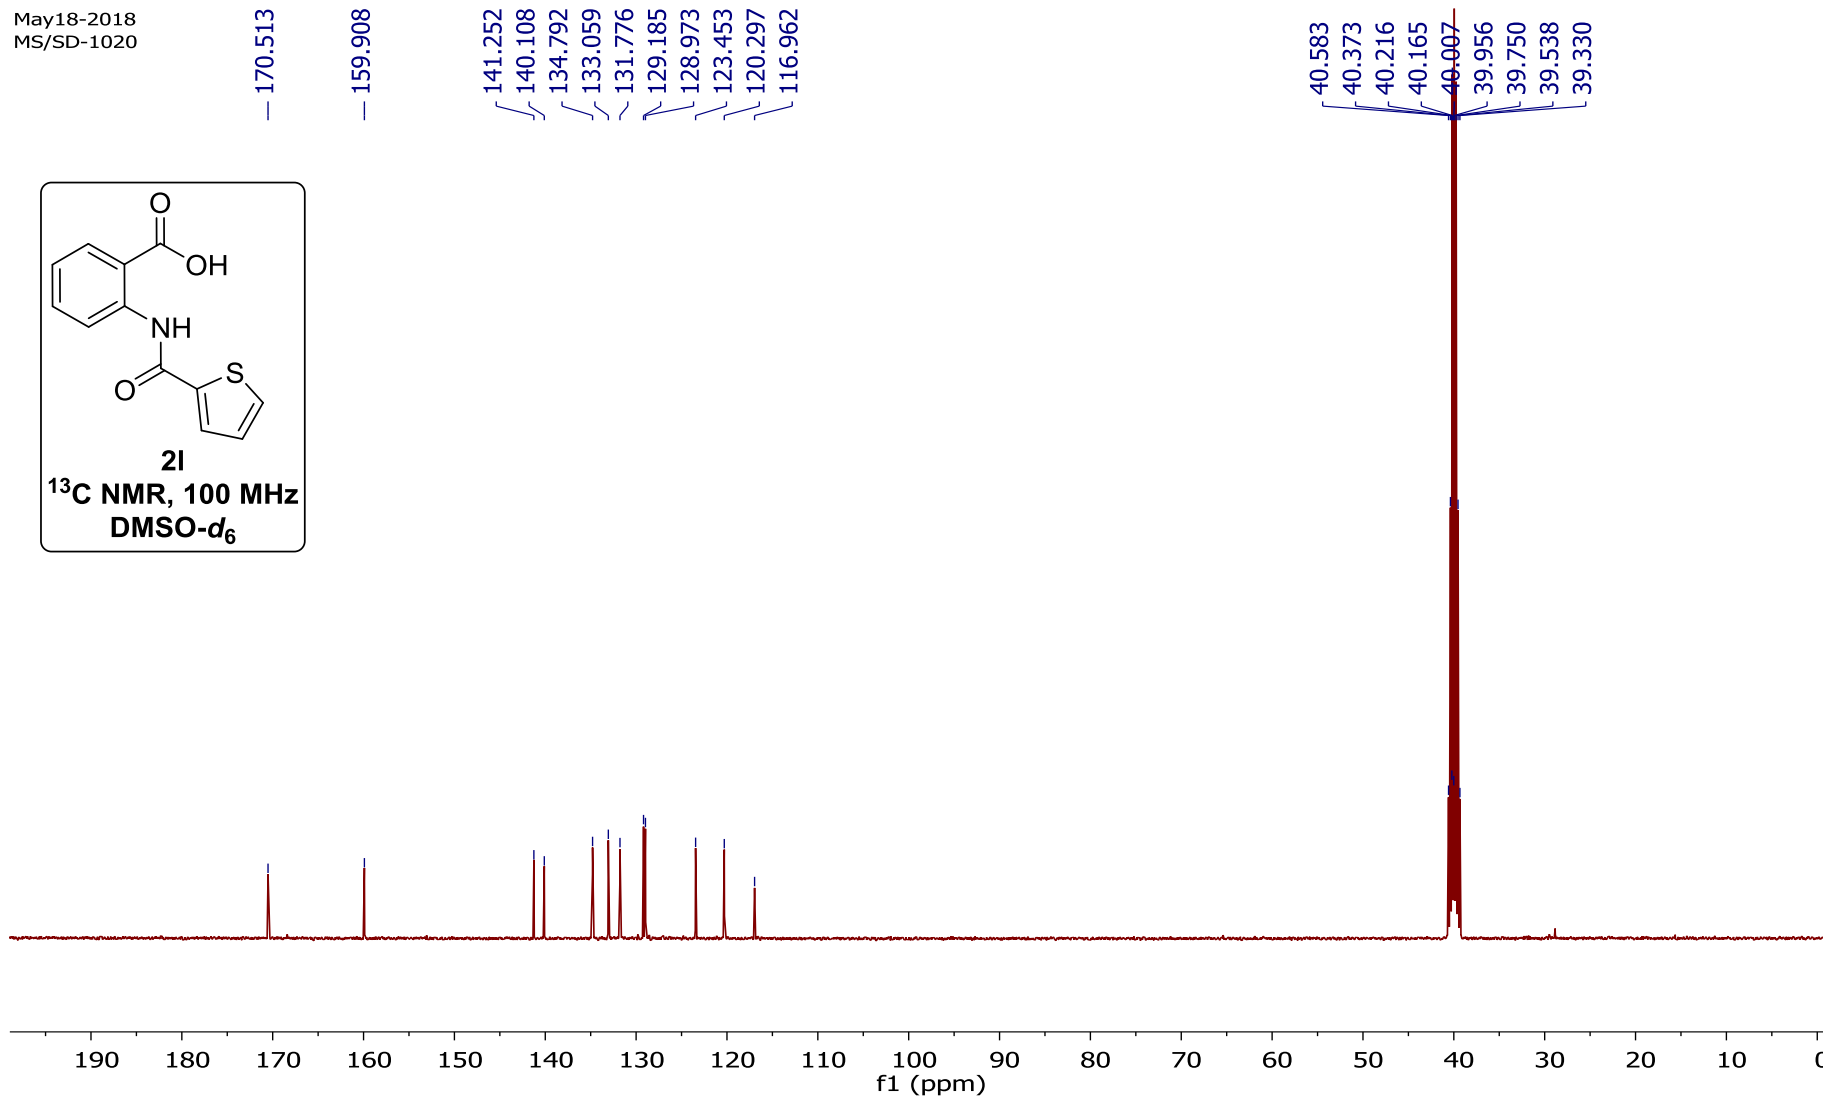

|               |              |             |                      |                 |              |                        |                     |
|---------------|--------------|-------------|----------------------|-----------------|--------------|------------------------|---------------------|
| Sample Name   | MS-SD-1020   | Position    | P1-B3                | Instrument Name | Instrument 1 | User Name              |                     |
| Inj Vol       | 0.25         | InjPosition |                      | SampleType      | Sample       | IRM Calibration Status | Success             |
| Data Filename | MS-SD-1020.d | ACQ Method  | Ch860ChD40Dual AJS E | Comment         |              | Acquired Time          | 1/2/2019 5:30:09 PM |

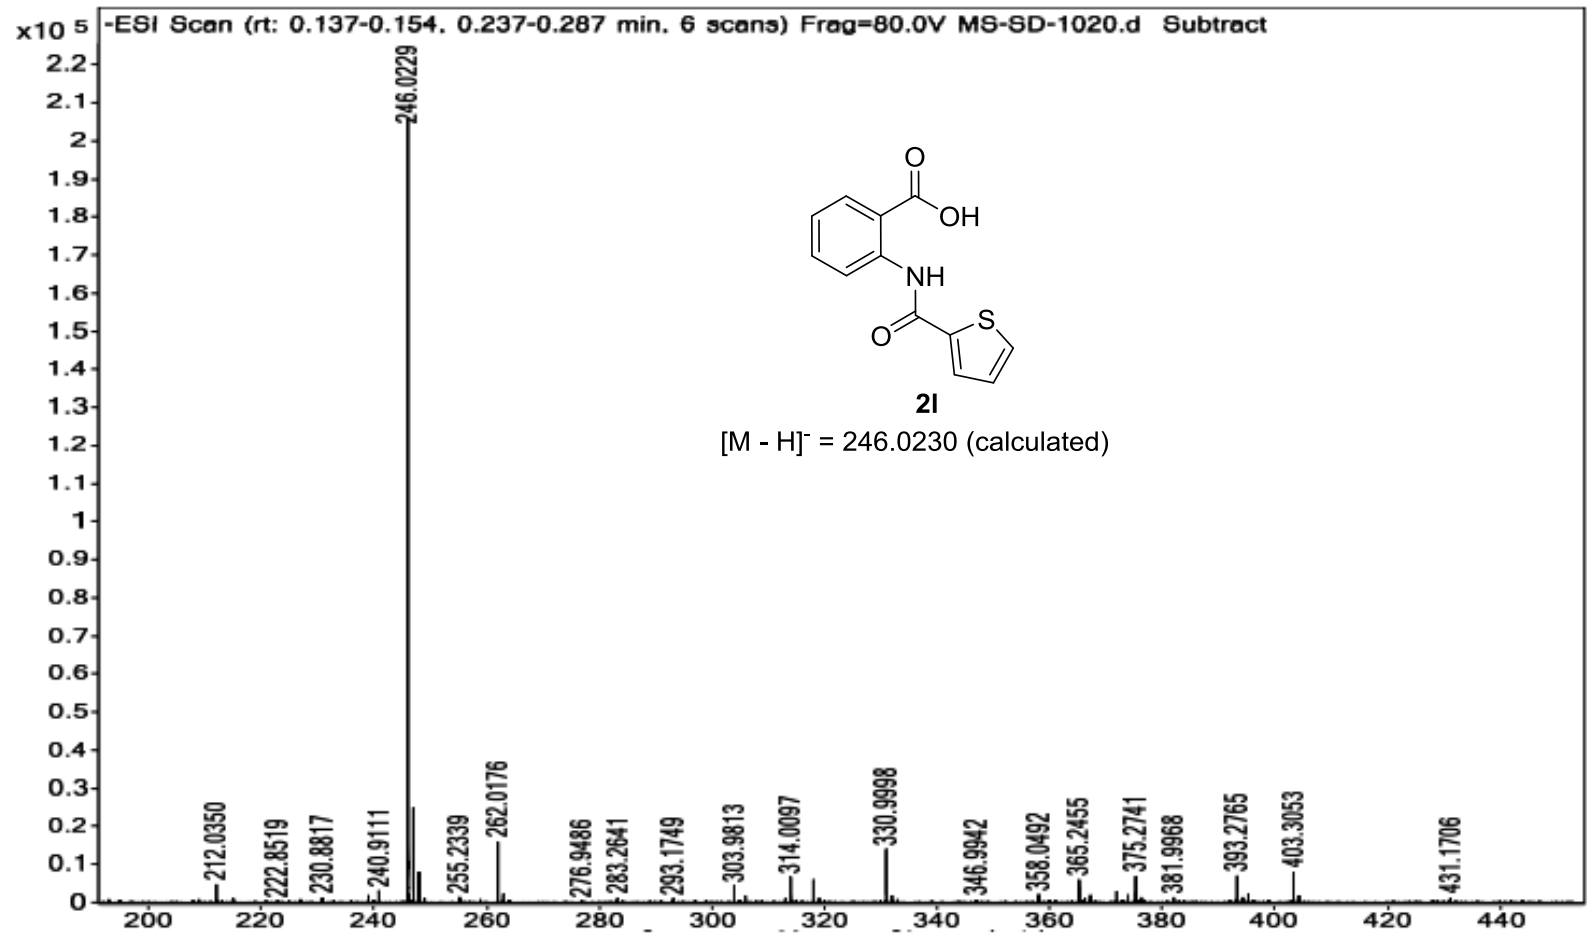

Jun28-2018  
MS/SD-1021

— 13.6167

— 11.8348

8.7494  
8.7286  
8.4026  
8.3930  
8.3796  
8.1488  
8.1282  
8.0715  
8.0598  
8.0508  
8.0375  
7.9243  
7.9066  
7.7323  
7.7127  
7.6928  
7.6654  
7.6457  
7.6368  
7.6267  
7.6158  
7.2774  
7.2584  
7.2394

— 3.1823

— 2.5067

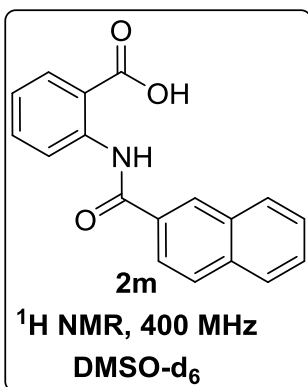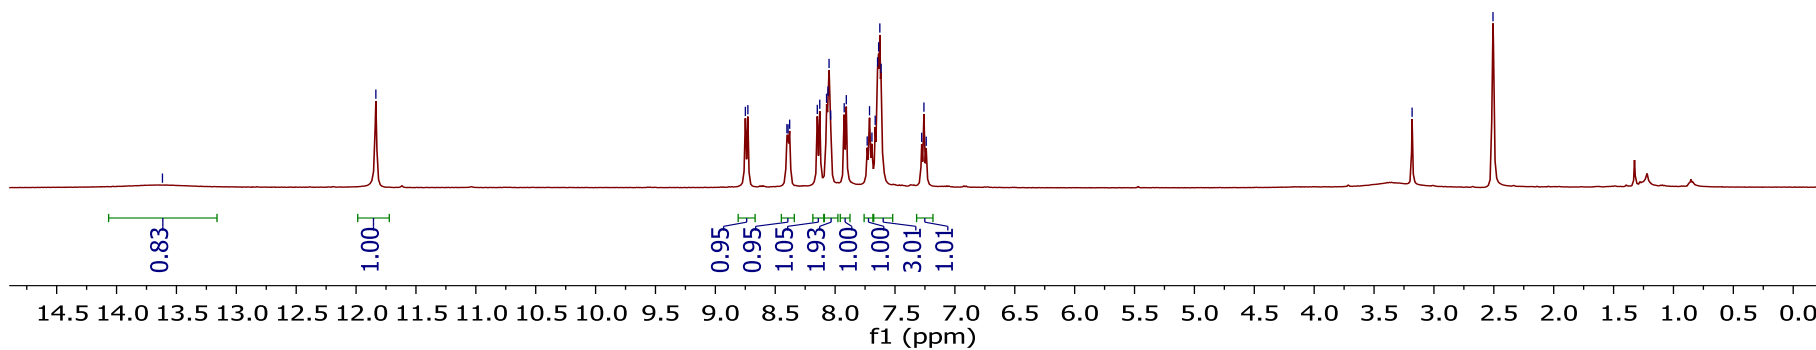

Jun28-2018  
MS/SD-1021

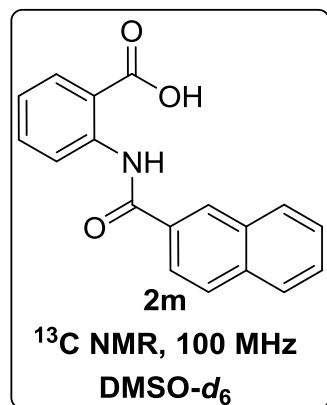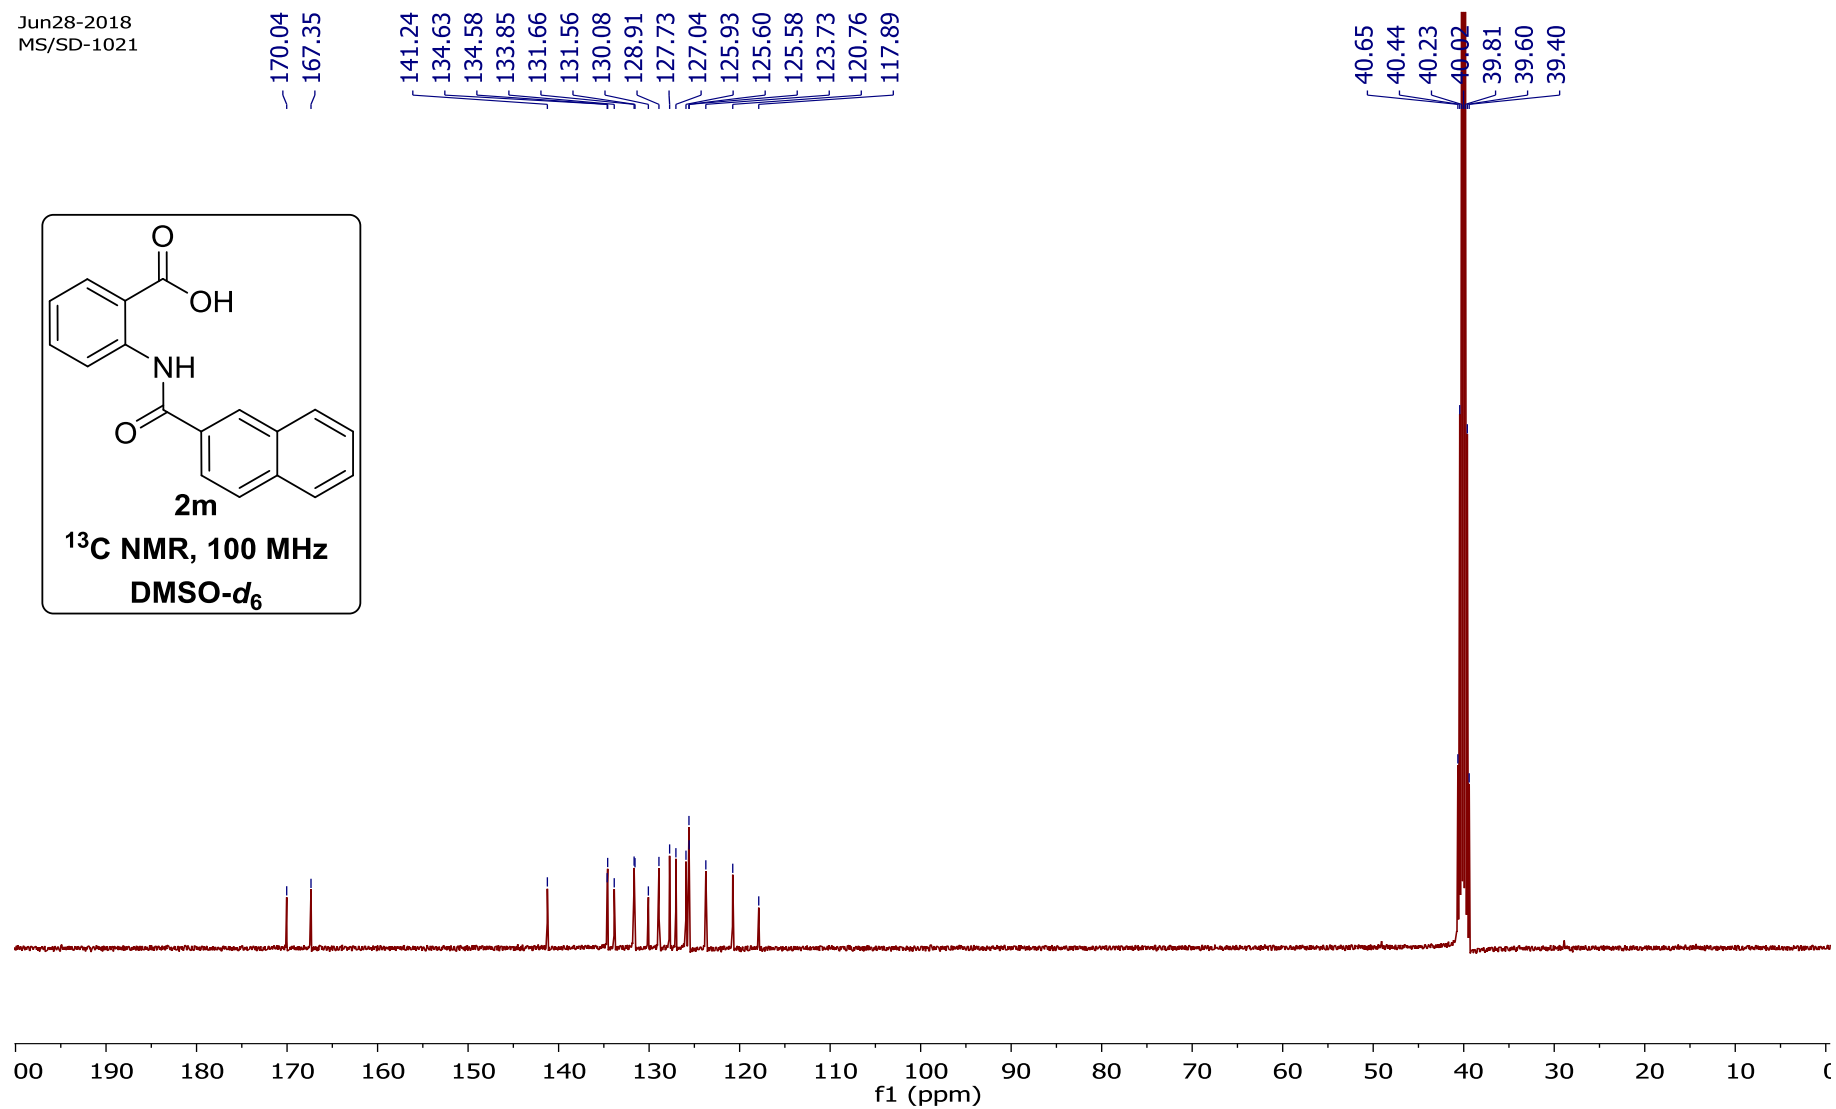



|               |              |             |                      |                 |              |                        |                        |
|---------------|--------------|-------------|----------------------|-----------------|--------------|------------------------|------------------------|
| Sample Name   | M5-SD-1021   | Position    | P2-F1                | Instrument Name | Instrument 1 | User Name              |                        |
| Inj Vol       | 0.25         | InjPosition |                      | SampleType      | Sample       | IRM Calibration Status | Success                |
| Data Filename | M5-SD-1021.d | ACQ Method  | ChB60ChA40Dual AJS E | Comment         |              | Acquired Time          | 10/29/2018 12:38:14 PM |

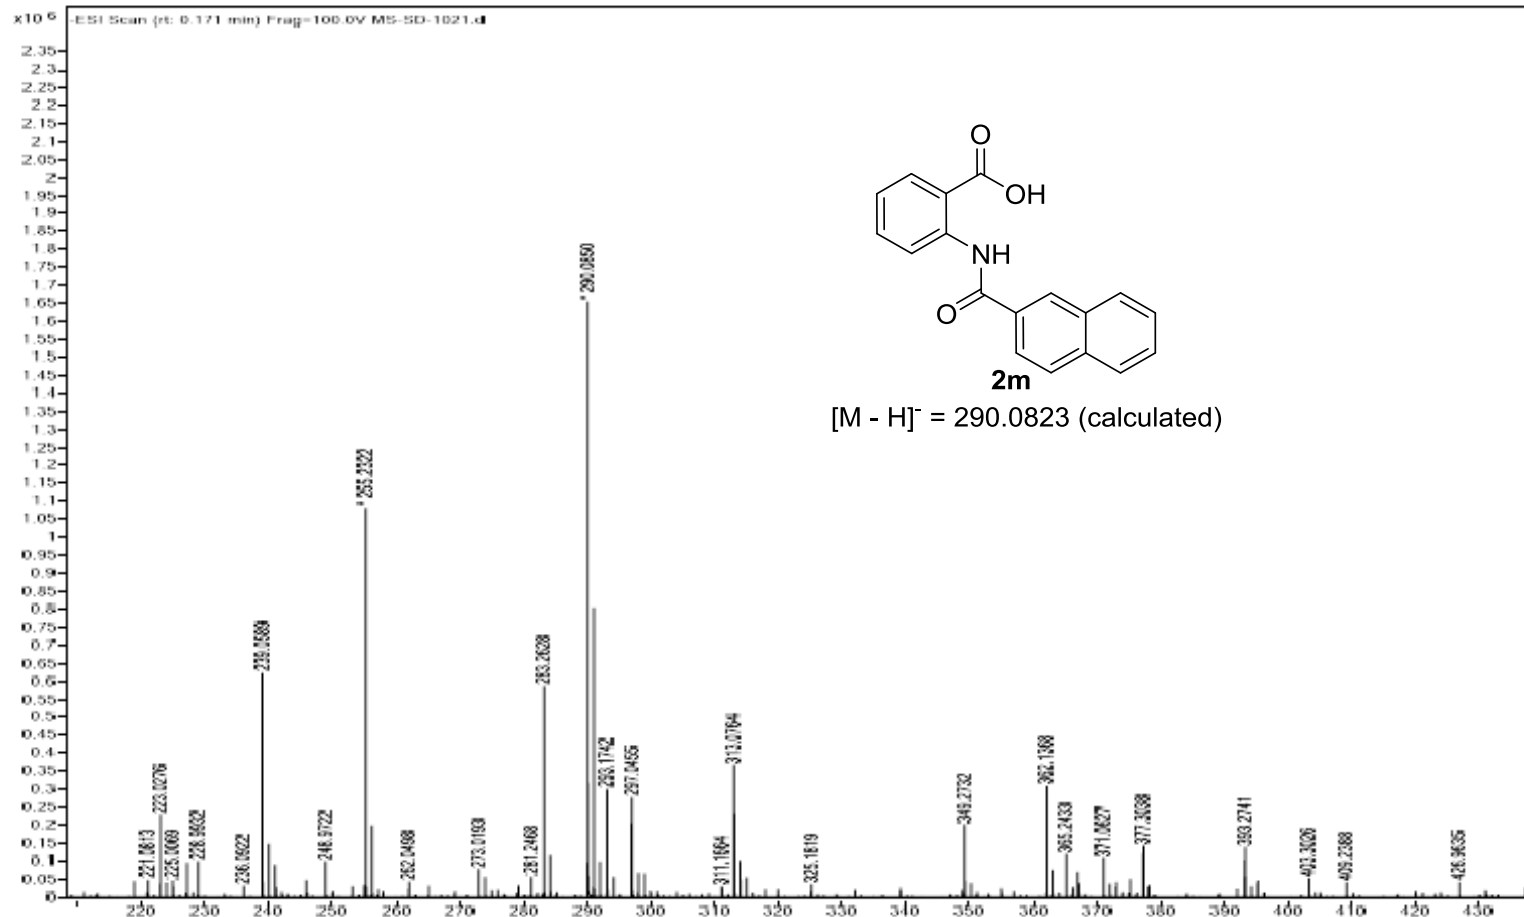

May18-2018  
MS/SD-1030  
— 13.6242

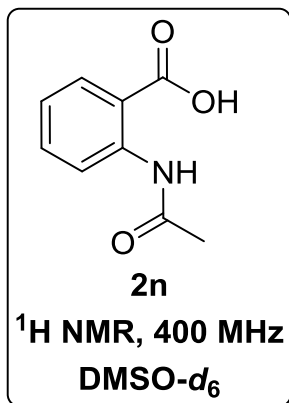

— 11.0847

8.4750  
8.4542  
7.9832  
7.9797  
7.9634  
7.9600  
7.5967  
7.5932  
7.5789  
7.5754  
7.5720  
7.5576  
7.5540  
7.1549  
7.1368  
7.1187

2.5151  
2.5105  
2.5057  
2.5011  
2.4968  
2.1345

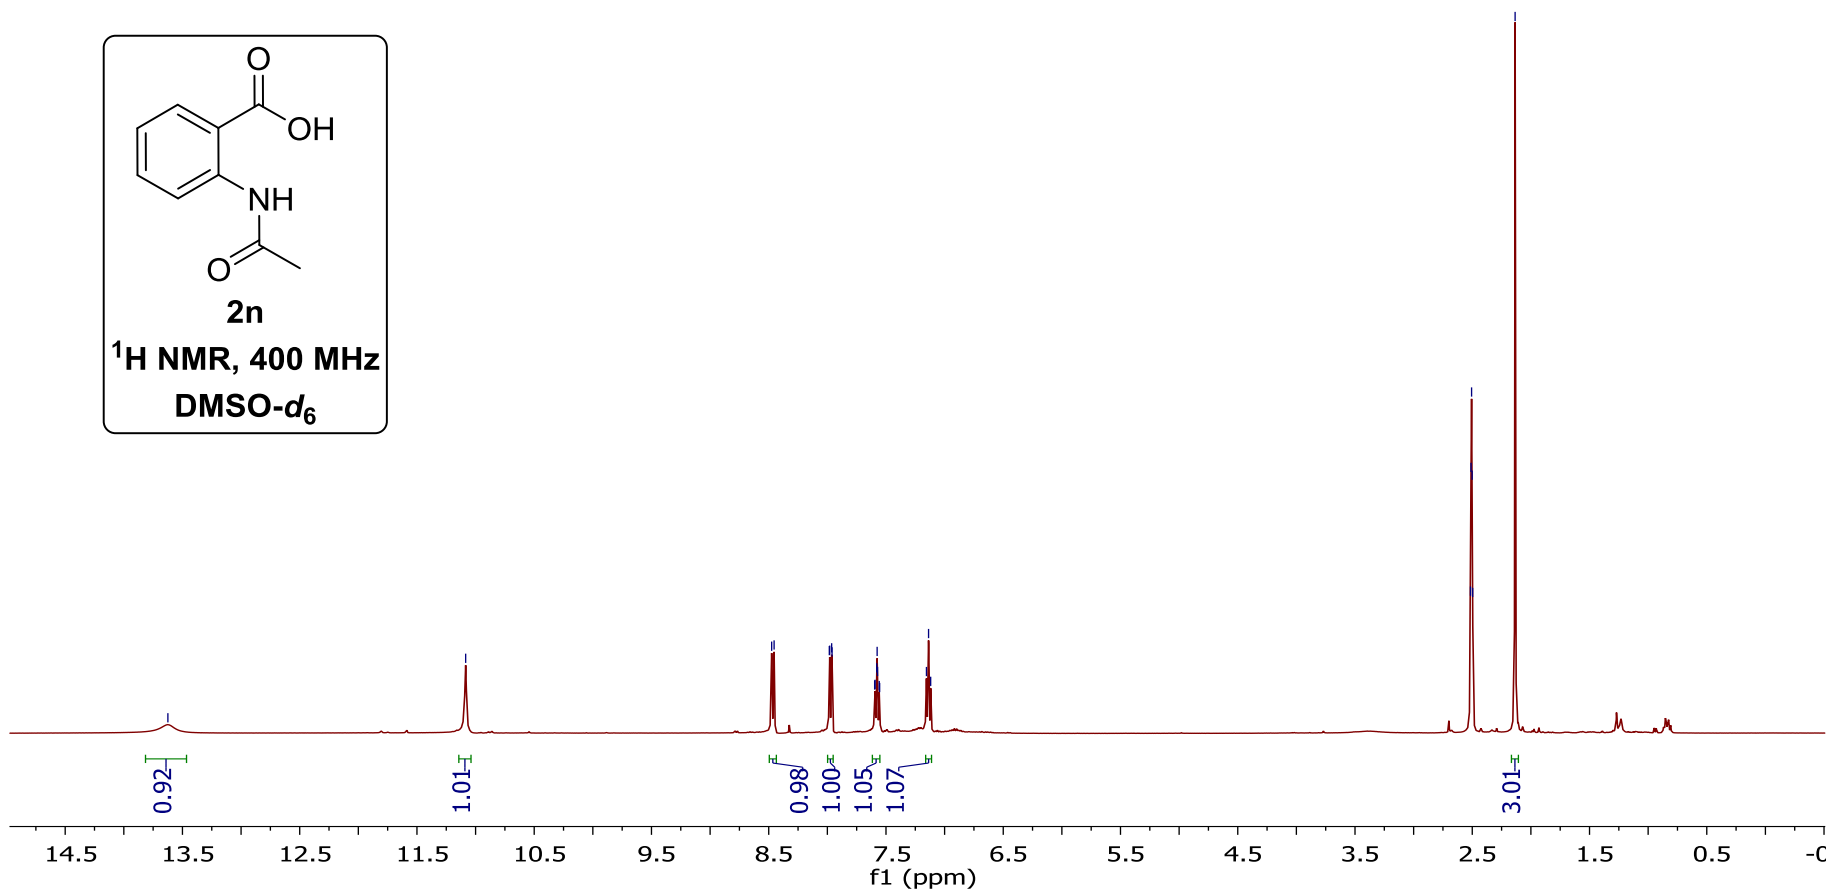

May18-2018  
MS/SD-1030

169.950  
168.929

141.313  
134.455  
131.516

123.011  
120.381  
116.941

40.578  
40.369  
40.160  
39.954  
39.742  
39.534  
39.325  
25.464

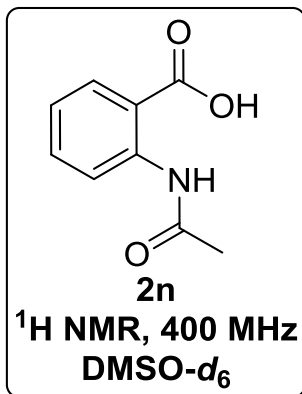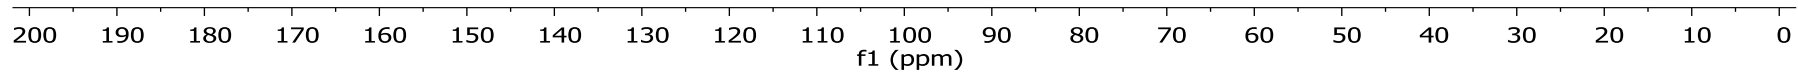

|               |              |             |                      |                 |              |                        |                     |
|---------------|--------------|-------------|----------------------|-----------------|--------------|------------------------|---------------------|
| Sample Name   | MS-SD-1030   | Position    | P1-810               | Instrument Name | Instrument 1 | User Name              |                     |
| Inj Vol       | 0.25         | InjPosition |                      | SampleType      | Sample       | IRM Calibration Status | Success             |
| Data Filename | MS-SD-1030.d | ACQ Method  | ChB60ChD40Dual AJS E | Comment         |              | Acquired Time          | 1/2/2019 6:02:45 PM |

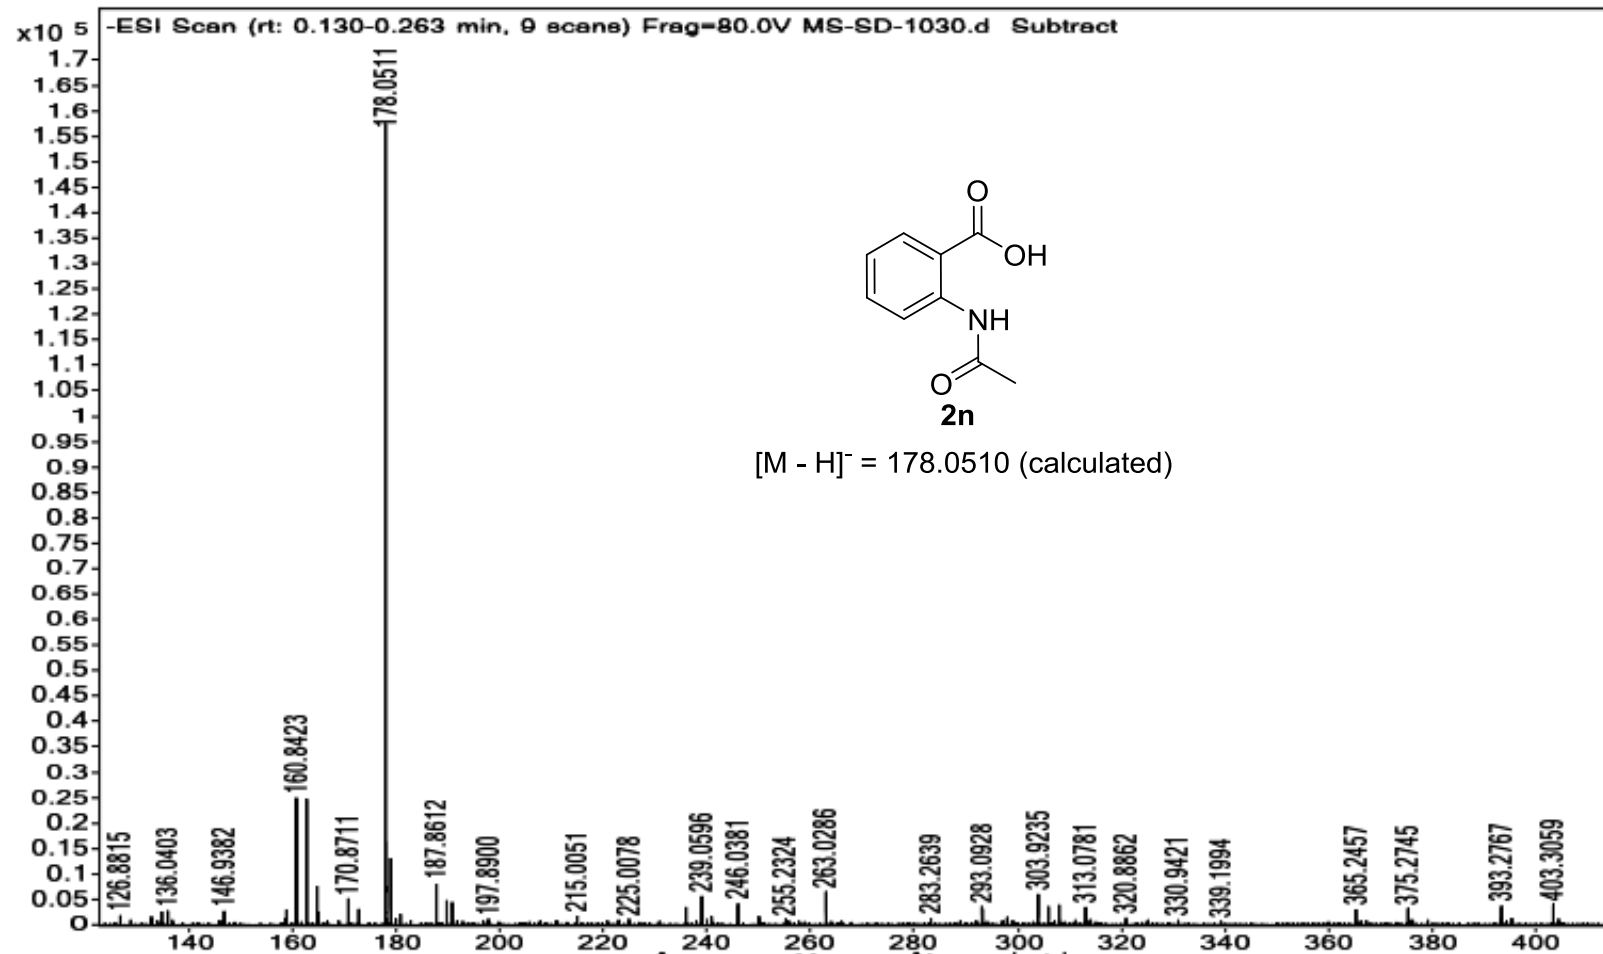

Nov28-2018/4  
OSP-2-36

— 12.0346

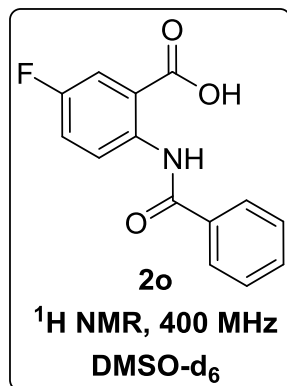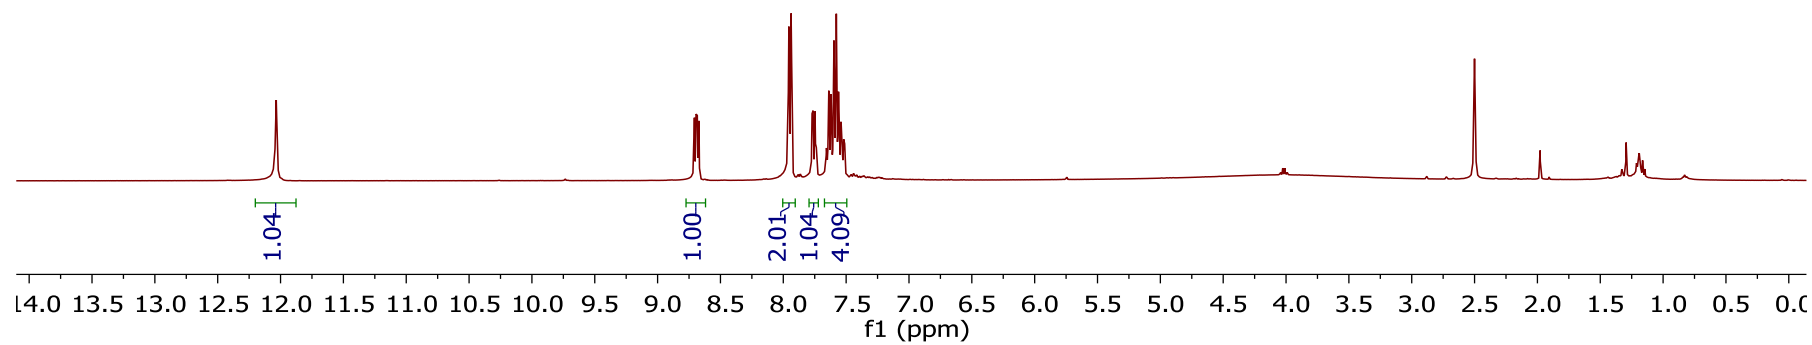

8.7072  
8.6942  
8.6841  
8.6712  
7.9584  
7.9553  
7.9511  
7.9436  
7.9382  
7.9339  
7.7711  
7.7631  
7.7476  
7.7397  
7.6561  
7.6379  
7.6200  
7.5969  
7.5779  
7.5610  
7.5565  
7.5422  
7.5398  
7.5344  
7.5196  
7.5117  
2.5097  
2.5050  
2.5004  
2.4958  
2.4912

Nov28-2018/10  
OSP-2-36

169.25  
165.06  
158.56  
156.16  
137.94  
137.91  
134.81  
132.66  
129.43  
127.49  
122.67  
122.60  
121.56  
121.34  
119.49  
119.42  
117.61  
117.38

40.55  
40.34  
40.14  
39.93  
39.72  
39.51  
39.30

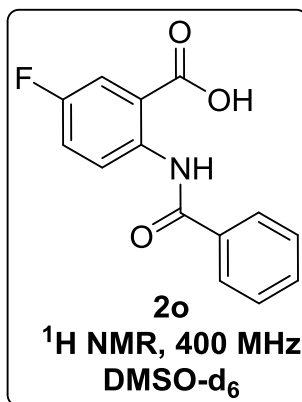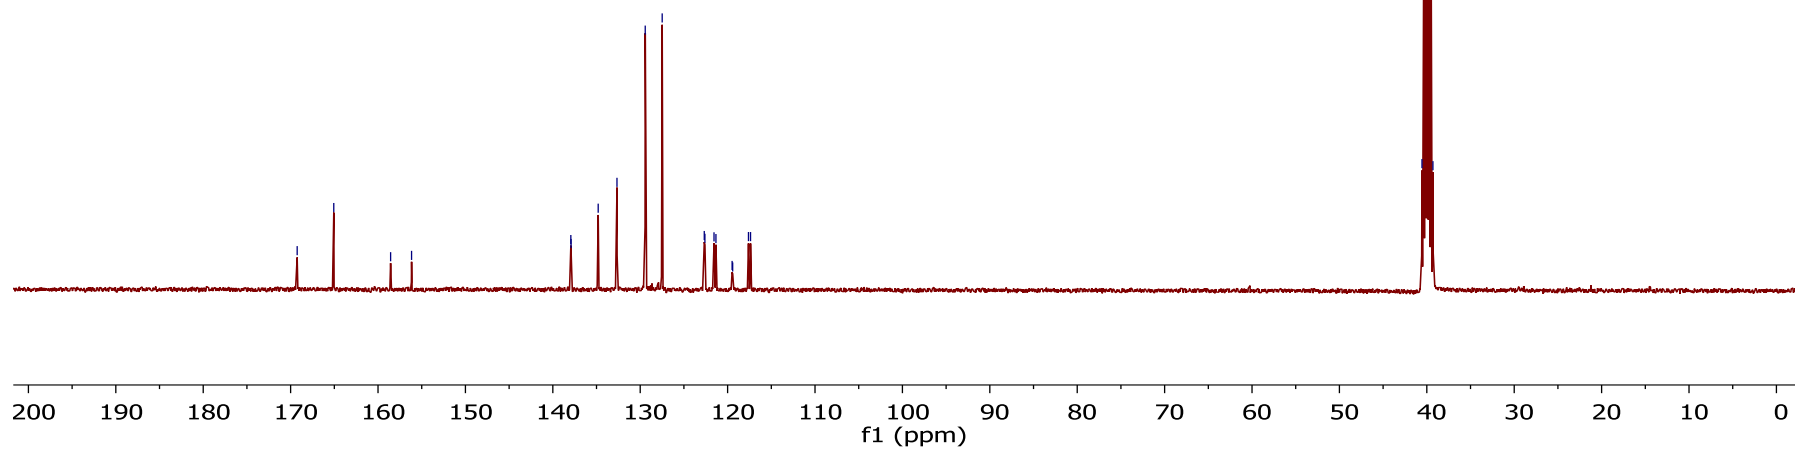

|               |            |             |                      |                 |              |                        |                        |
|---------------|------------|-------------|----------------------|-----------------|--------------|------------------------|------------------------|
| Sample Name   | OSP-2-36   | Position    | P2-E5                | Instrument Name | Instrument 1 | User Name              |                        |
| Inj Vol       | 0.25       | InjPosition |                      | SampleType      | Sample       | IRM Calibration Status | Success                |
| Data Filename | OSP-2-36.d | ACQ Method  | ChB60ChA40Dual AJS E | Comment         |              | Acquired Time          | 10/29/2018 11:40:27 AM |

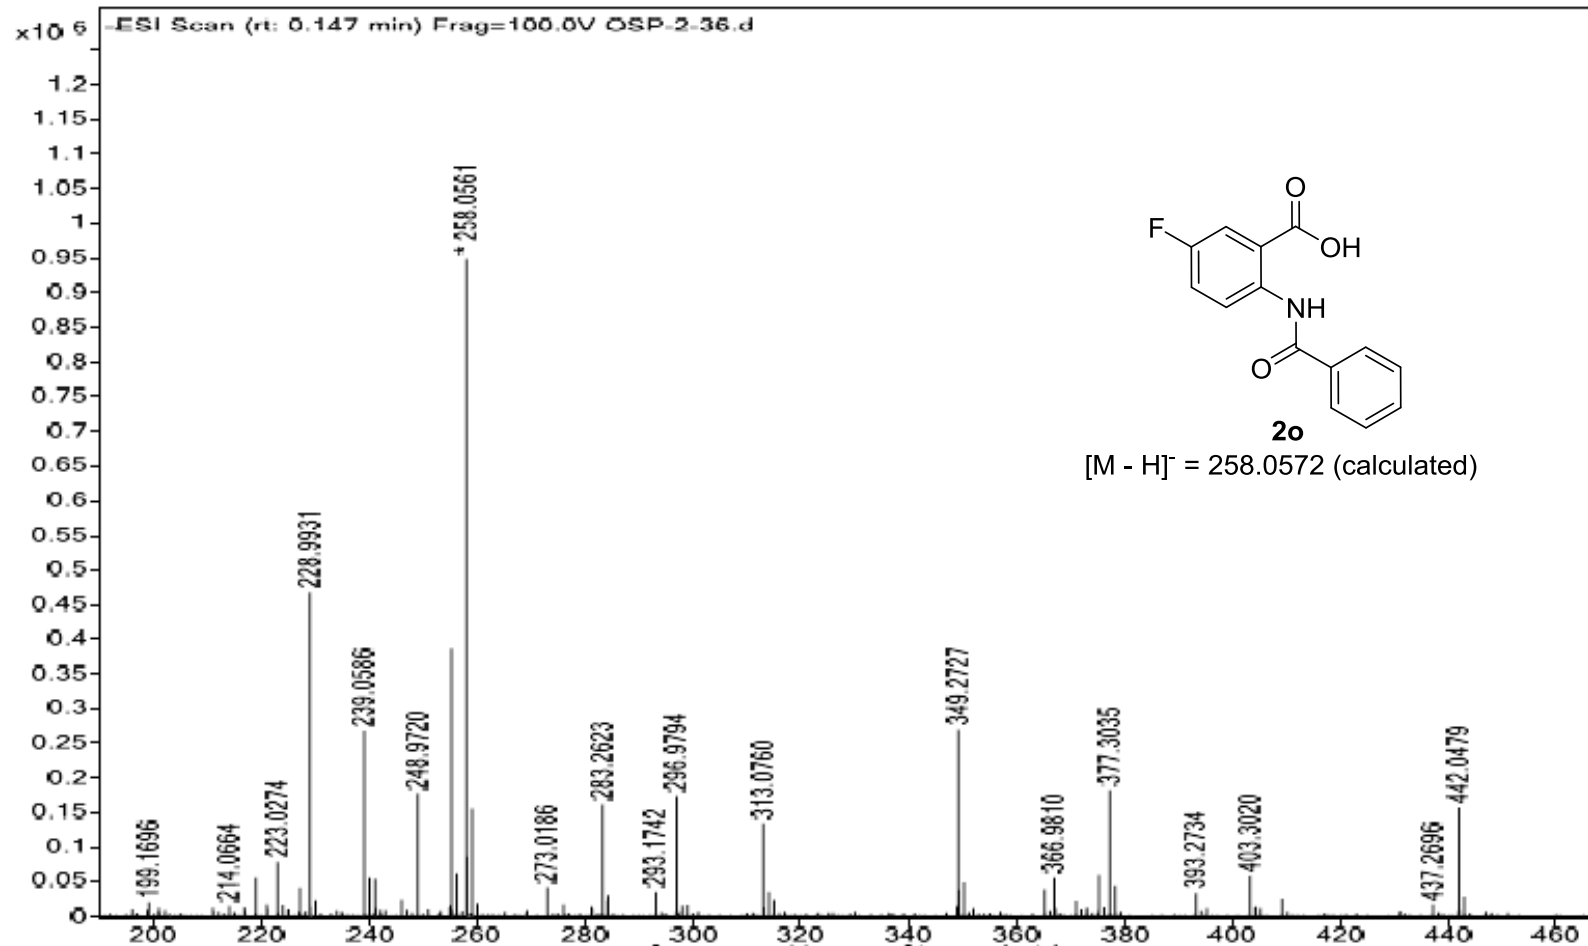

Dec21-2018/1  
OSP-2-41

— 12.1269

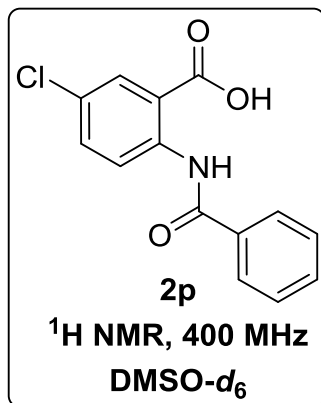

8.7223  
8.6997  
7.9826  
7.9759  
7.9512  
7.9336  
7.7275  
7.7211  
7.7050  
7.6986  
7.6655  
7.6474  
7.6329  
7.6293  
7.6254  
7.6030  
7.5839  
7.5662

2.5093  
2.5050  
2.5001  
2.4954  
2.4909

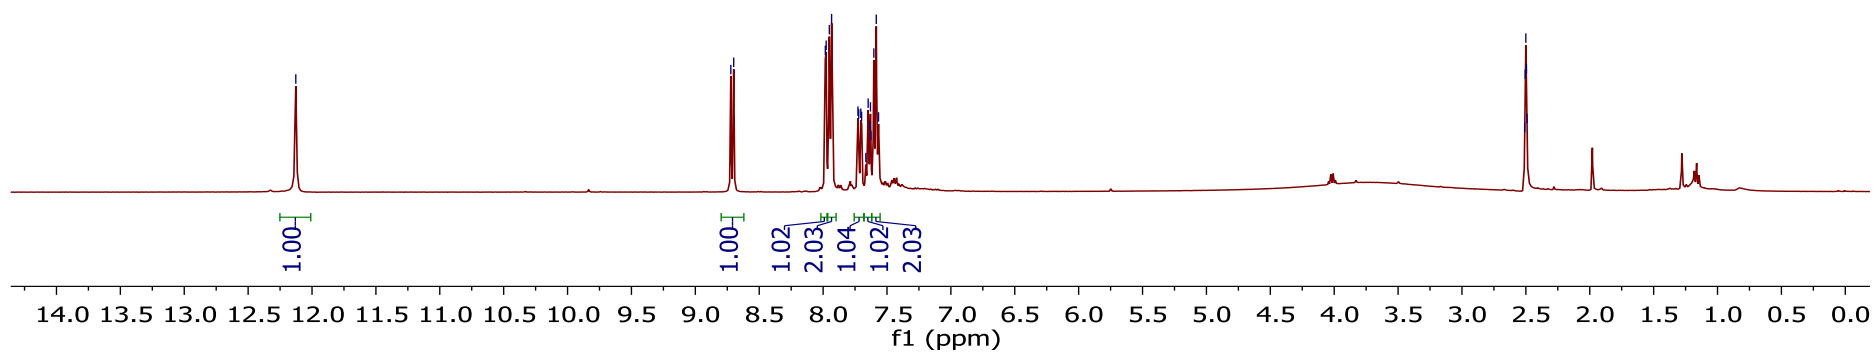



Dec21-2018/2  
OSP-2-41

— 169.20  
— 165.18

140.31  
134.68  
134.27  
132.79  
130.85  
129.47  
127.51  
126.99  
122.22  
119.10

40.58  
40.37  
40.17  
39.96  
39.75  
39.54  
39.33

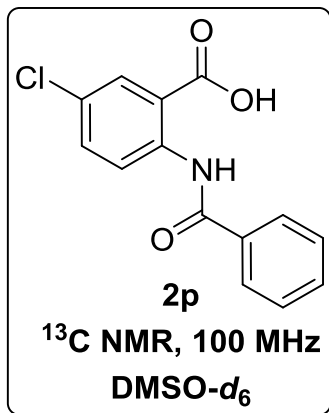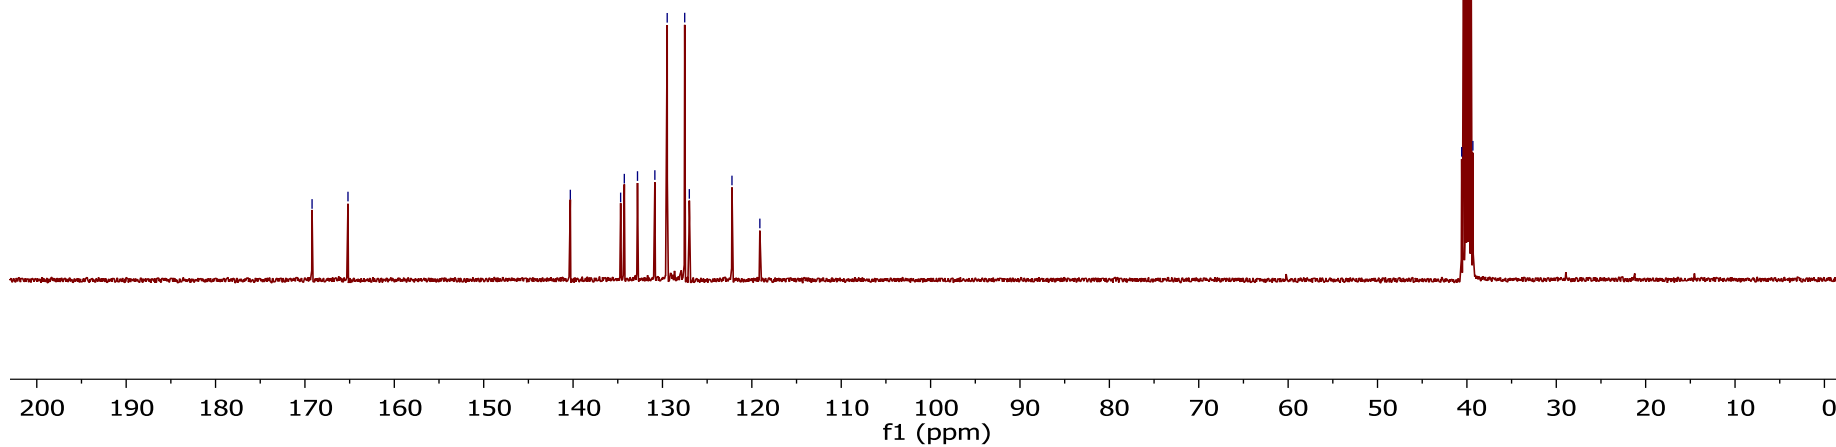

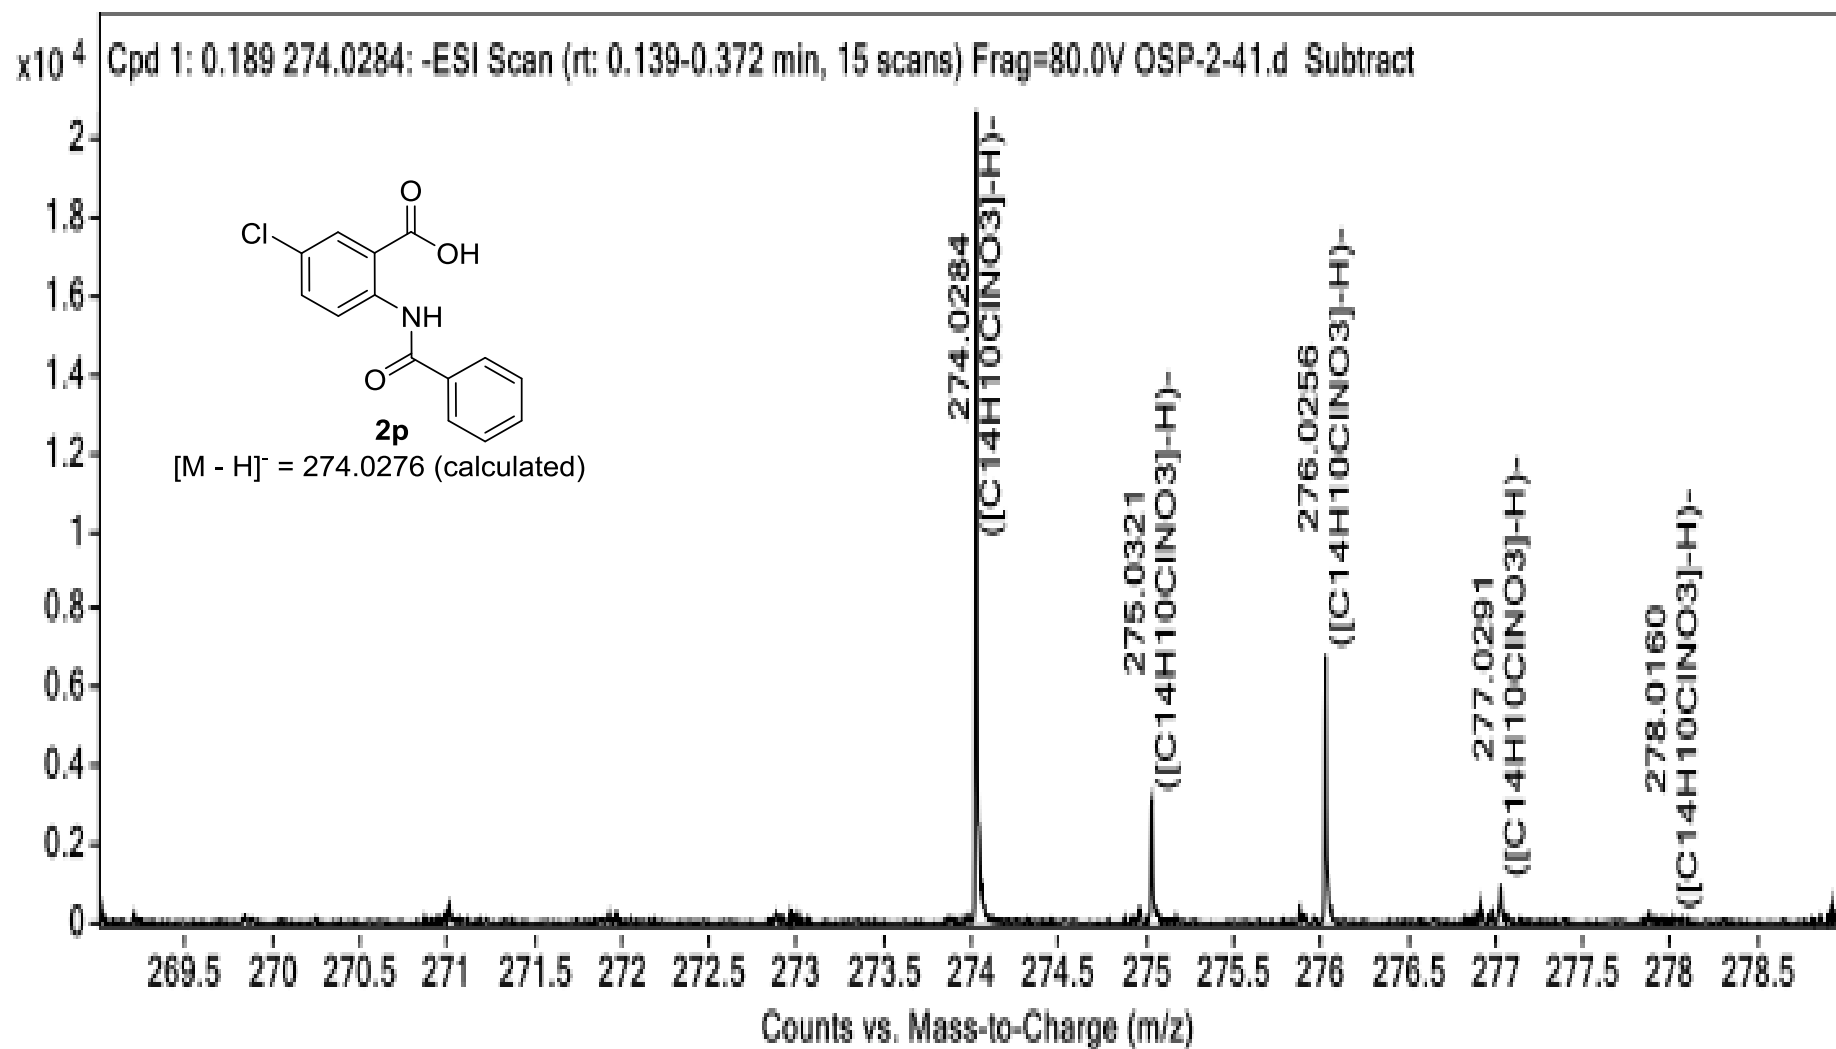

Jun09-2018  
MS-SD-1026

— 11.6742

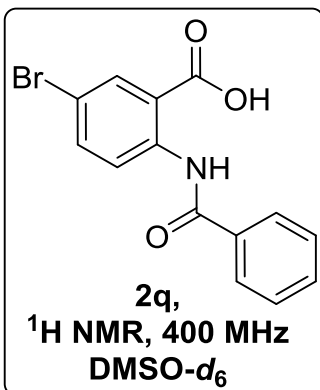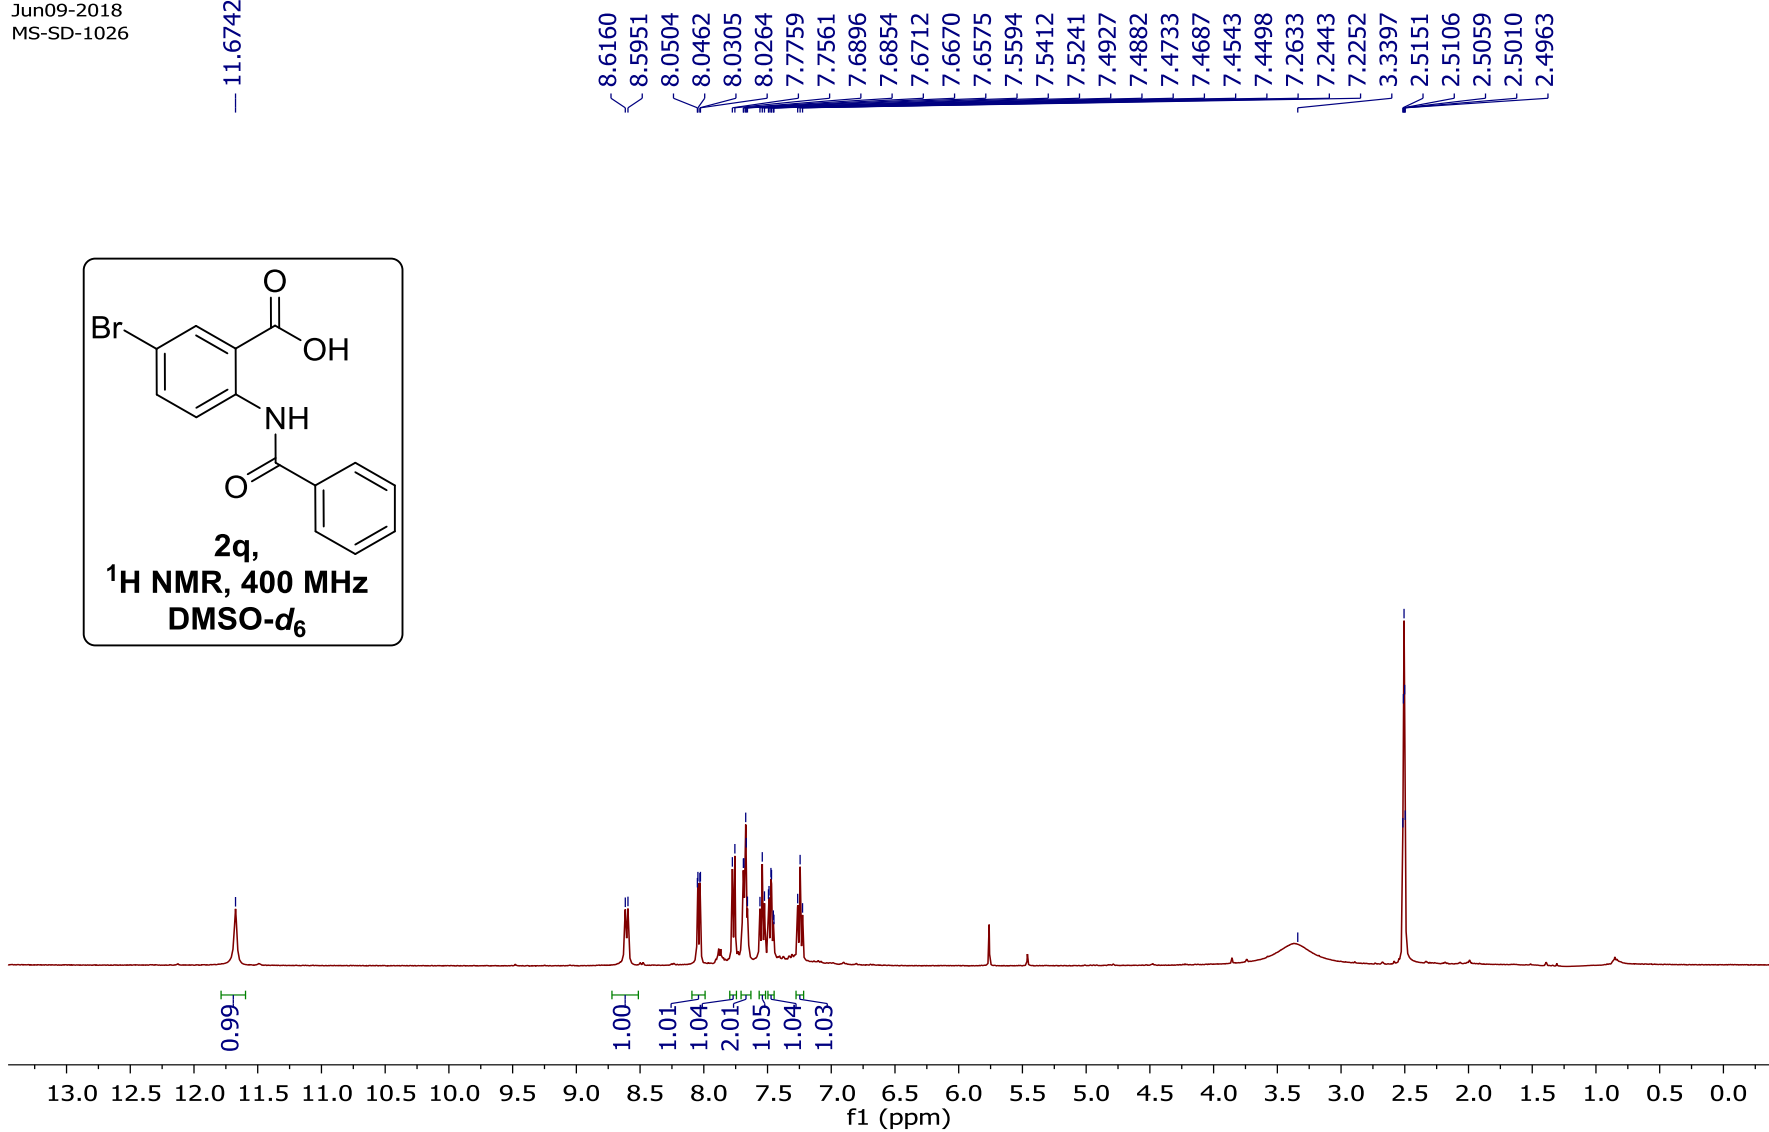

Jun09-2018  
MS-SD-1026

— 169.96  
— 165.93

140.77  
138.83  
134.58  
133.80  
132.40  
131.70  
129.33  
128.58  
123.95  
120.56  
119.21  
117.91

40.62  
40.41  
40.21  
40.00  
39.79  
39.58  
39.37

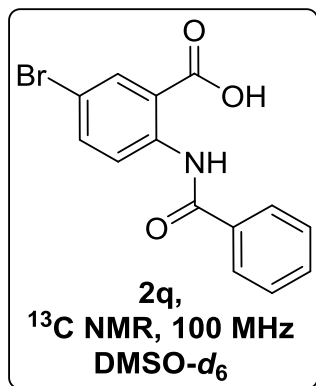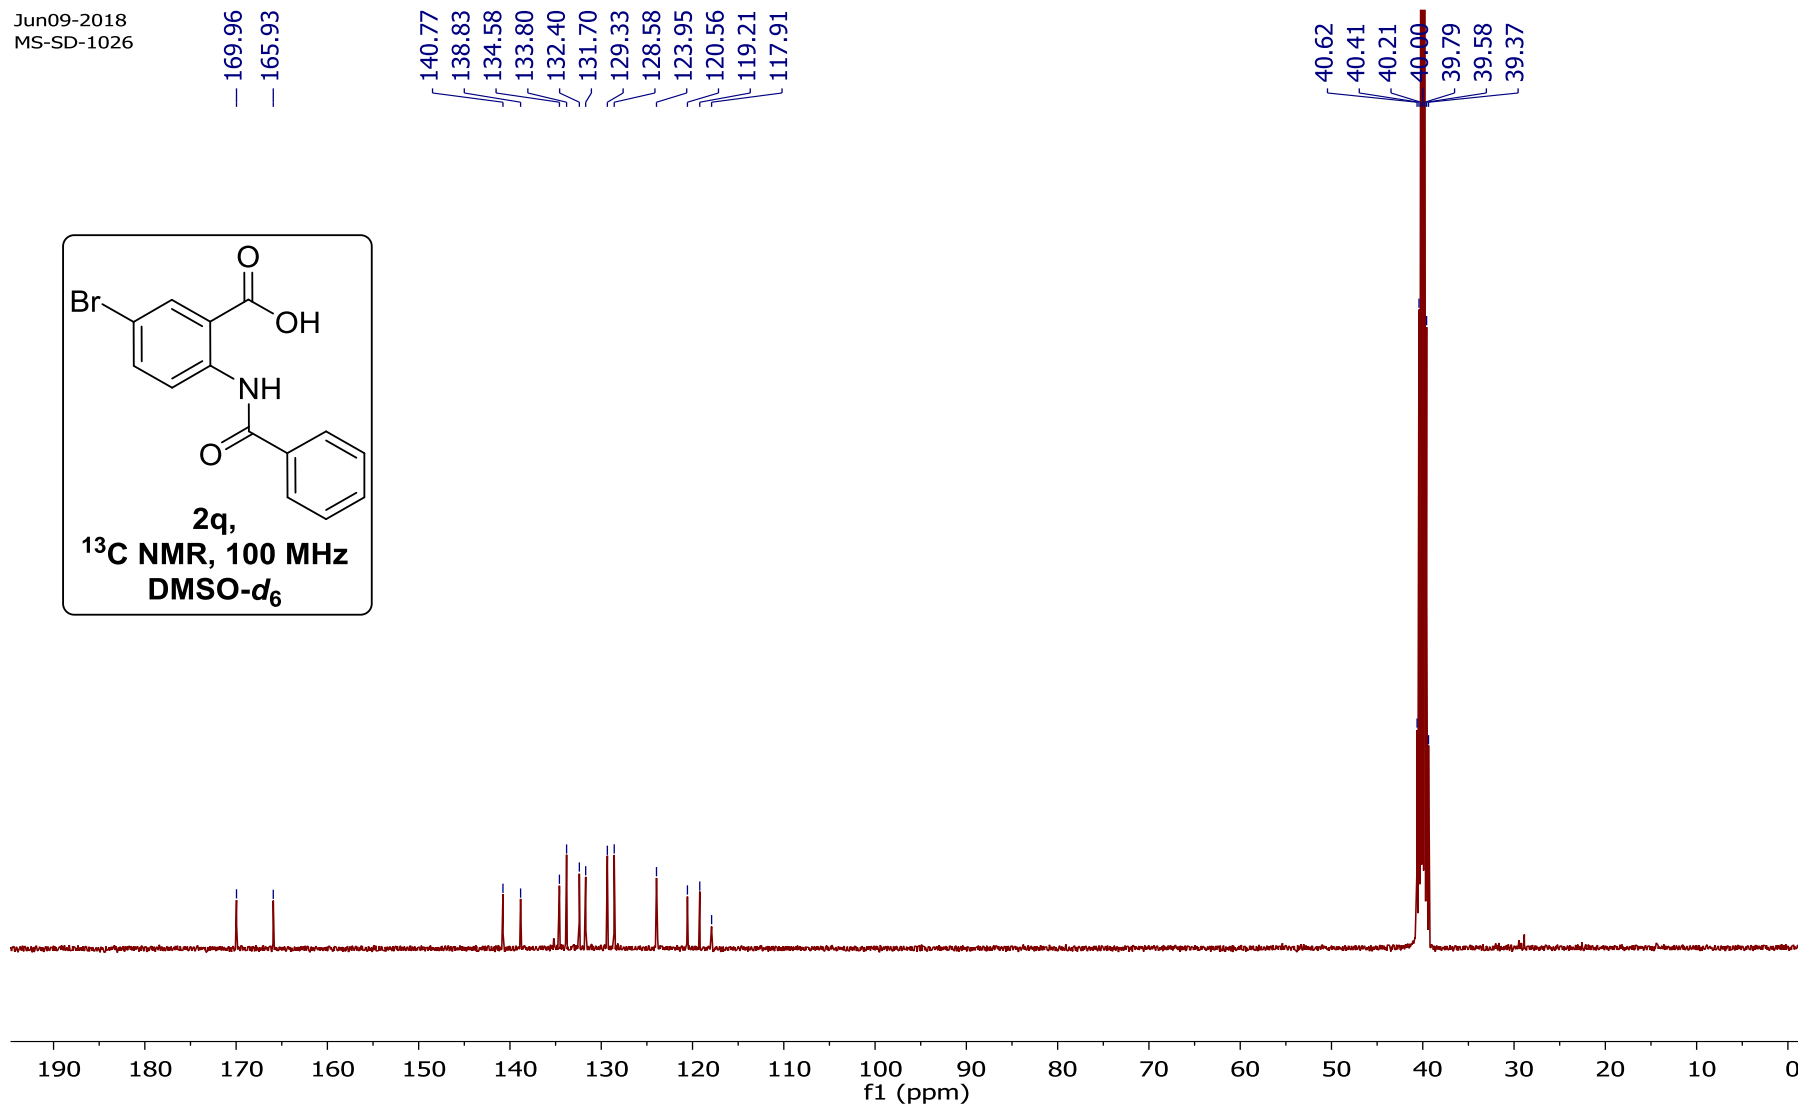

|               |              |             |                      |                 |              |                        |                     |
|---------------|--------------|-------------|----------------------|-----------------|--------------|------------------------|---------------------|
| Sample Name   | MS-SD-1026   | Position    | P1-B11               | Instrument Name | Instrument 1 | User Name              |                     |
| Inj Vol       | 0.25         | InjPosition |                      | SampleType      | Sample       | IRM Calibration Status | Success             |
| Data Filename | MS-SD-1026.d | ACQ Method  | ChB60ChD40Dual AJS E | Comment         |              | Acquired Time          | 1/2/2019 6:10:57 PM |

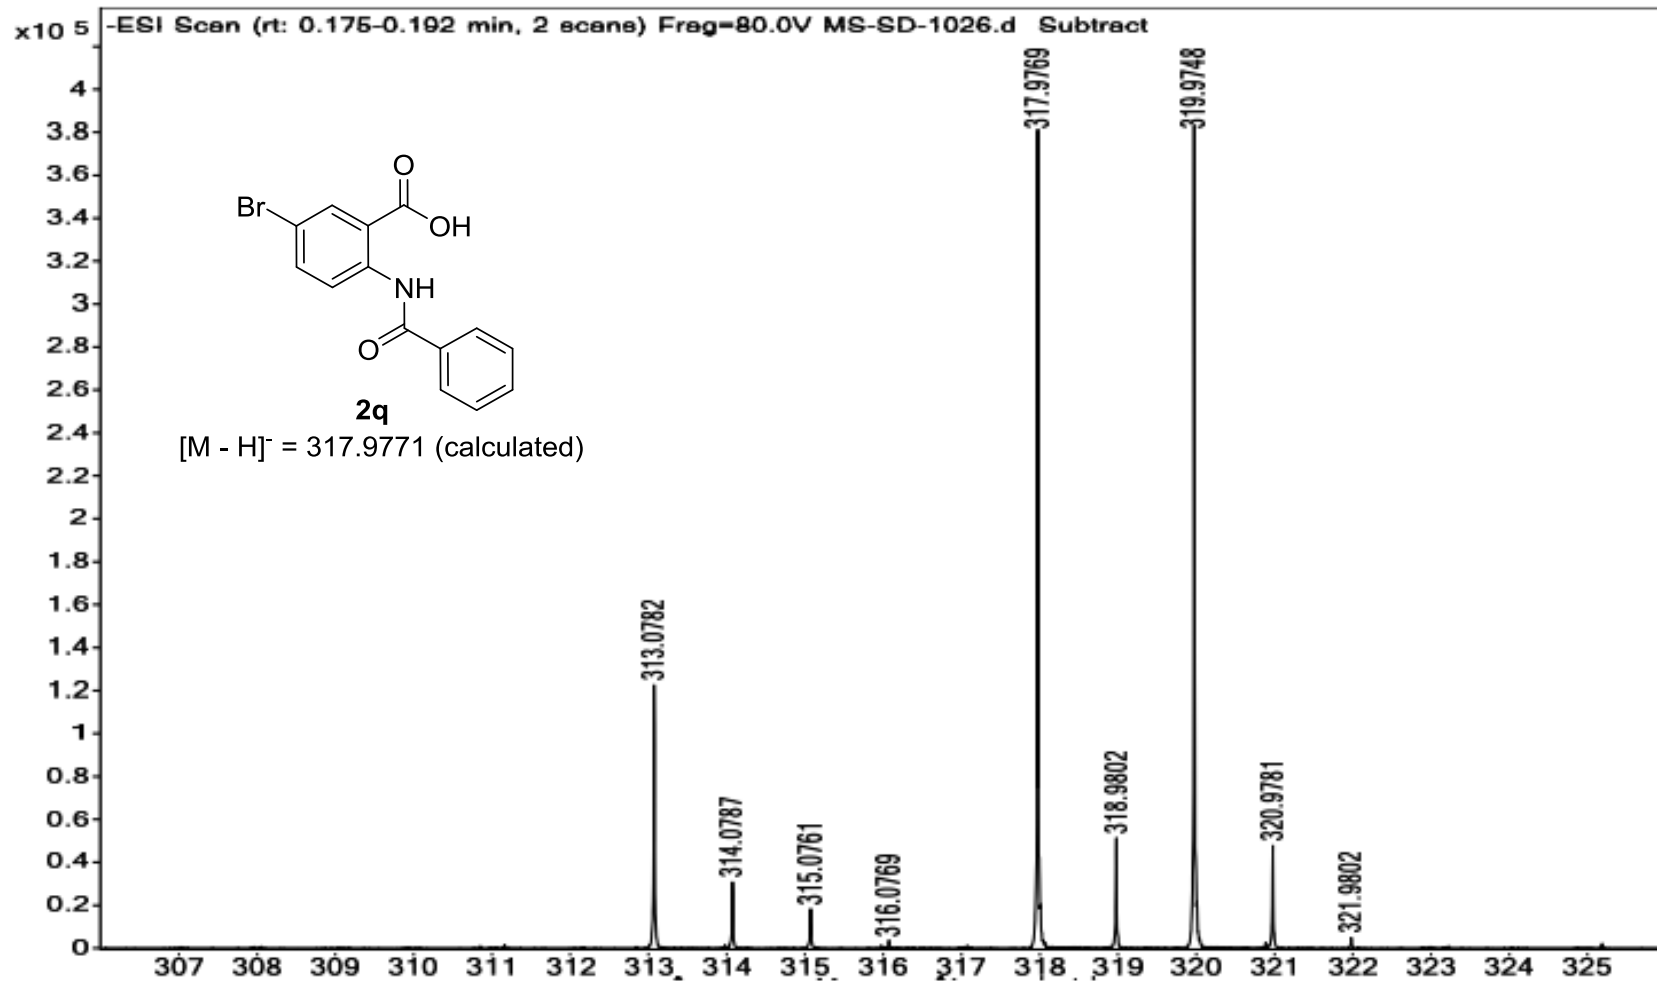

May18-2018  
MS/SD-1027

— 14.0894

— 12.3064

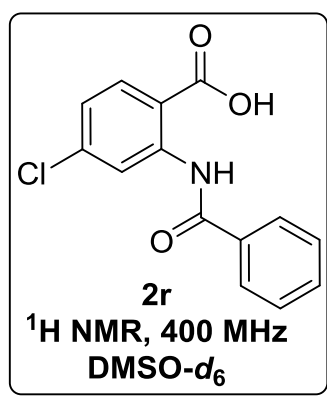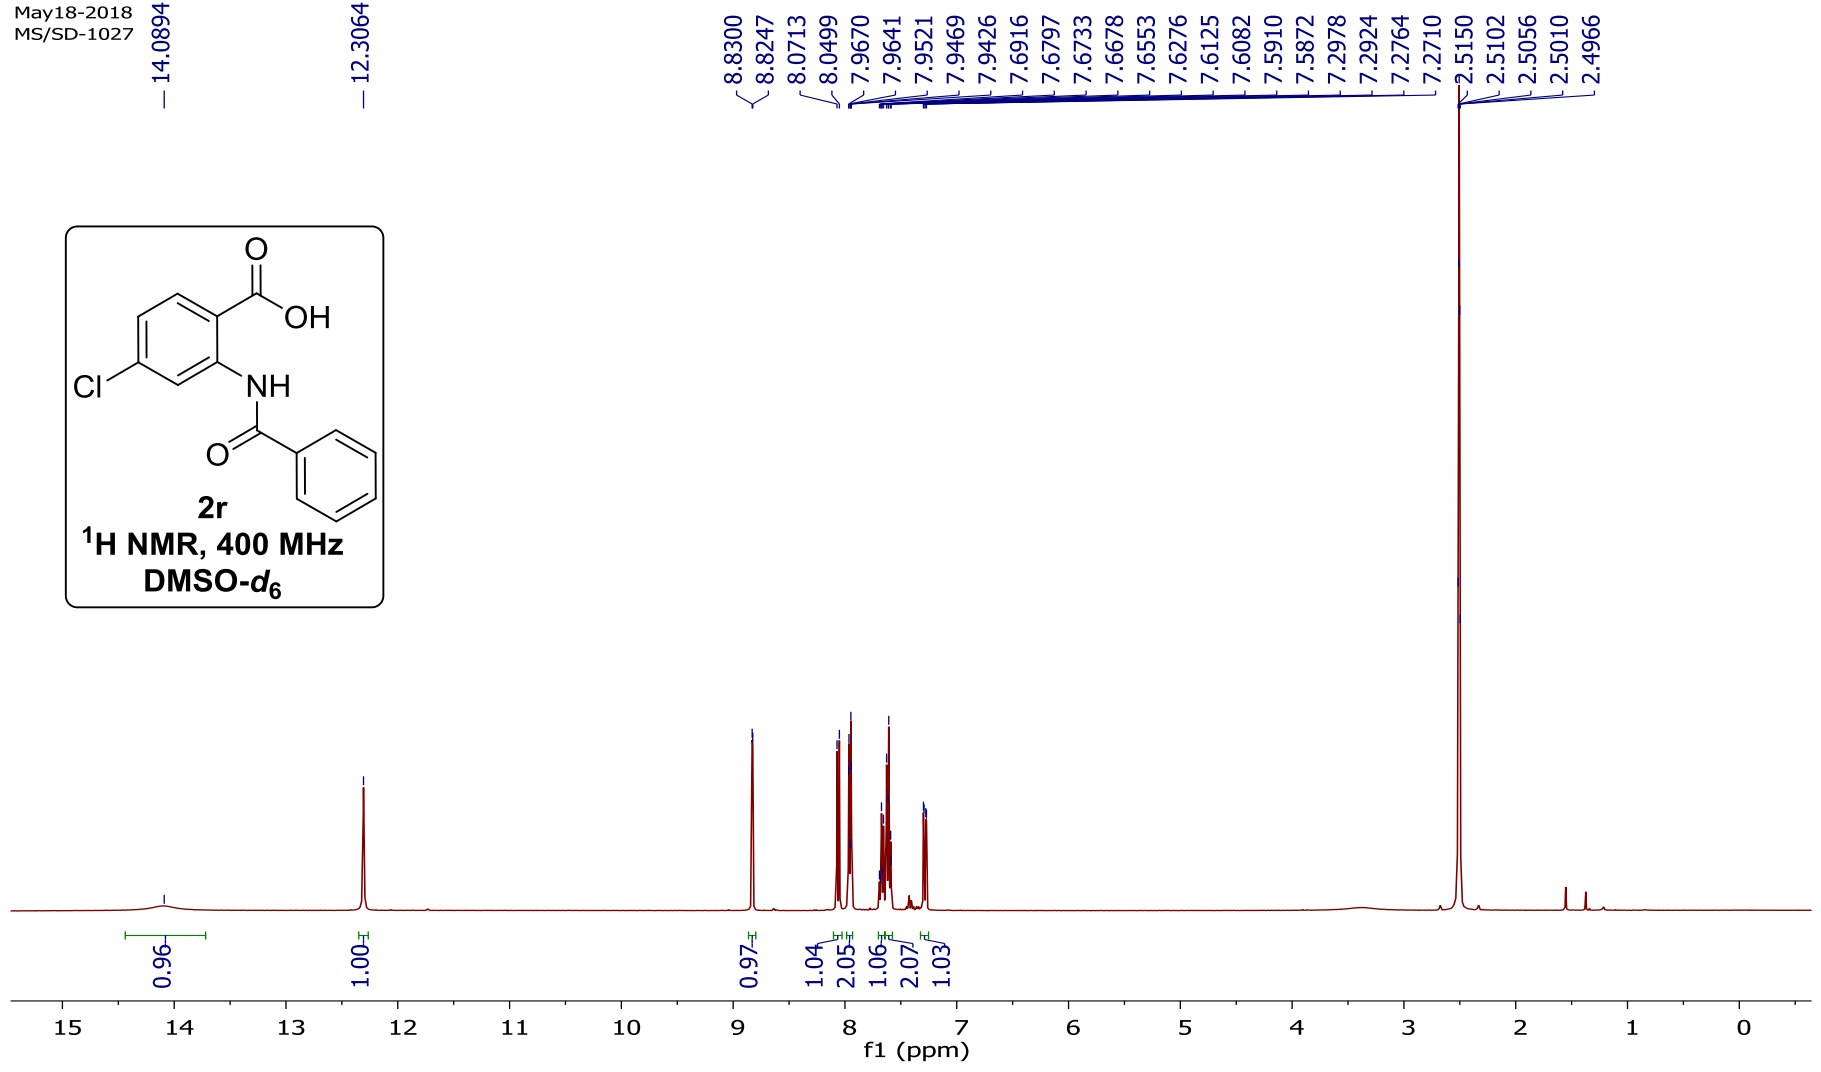

May18-2018  
MS/SD-1027

— 169.83  
— 165.43

142.61  
139.17  
134.50  
133.46  
132.98  
129.56  
127.54  
123.33  
119.61  
115.70

40.59  
40.38  
40.17  
39.97  
39.76  
39.55  
39.34

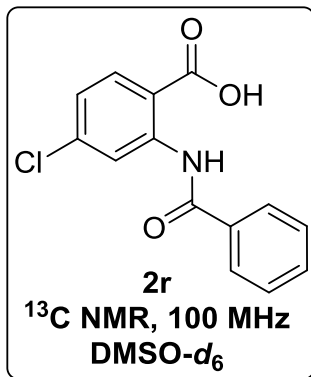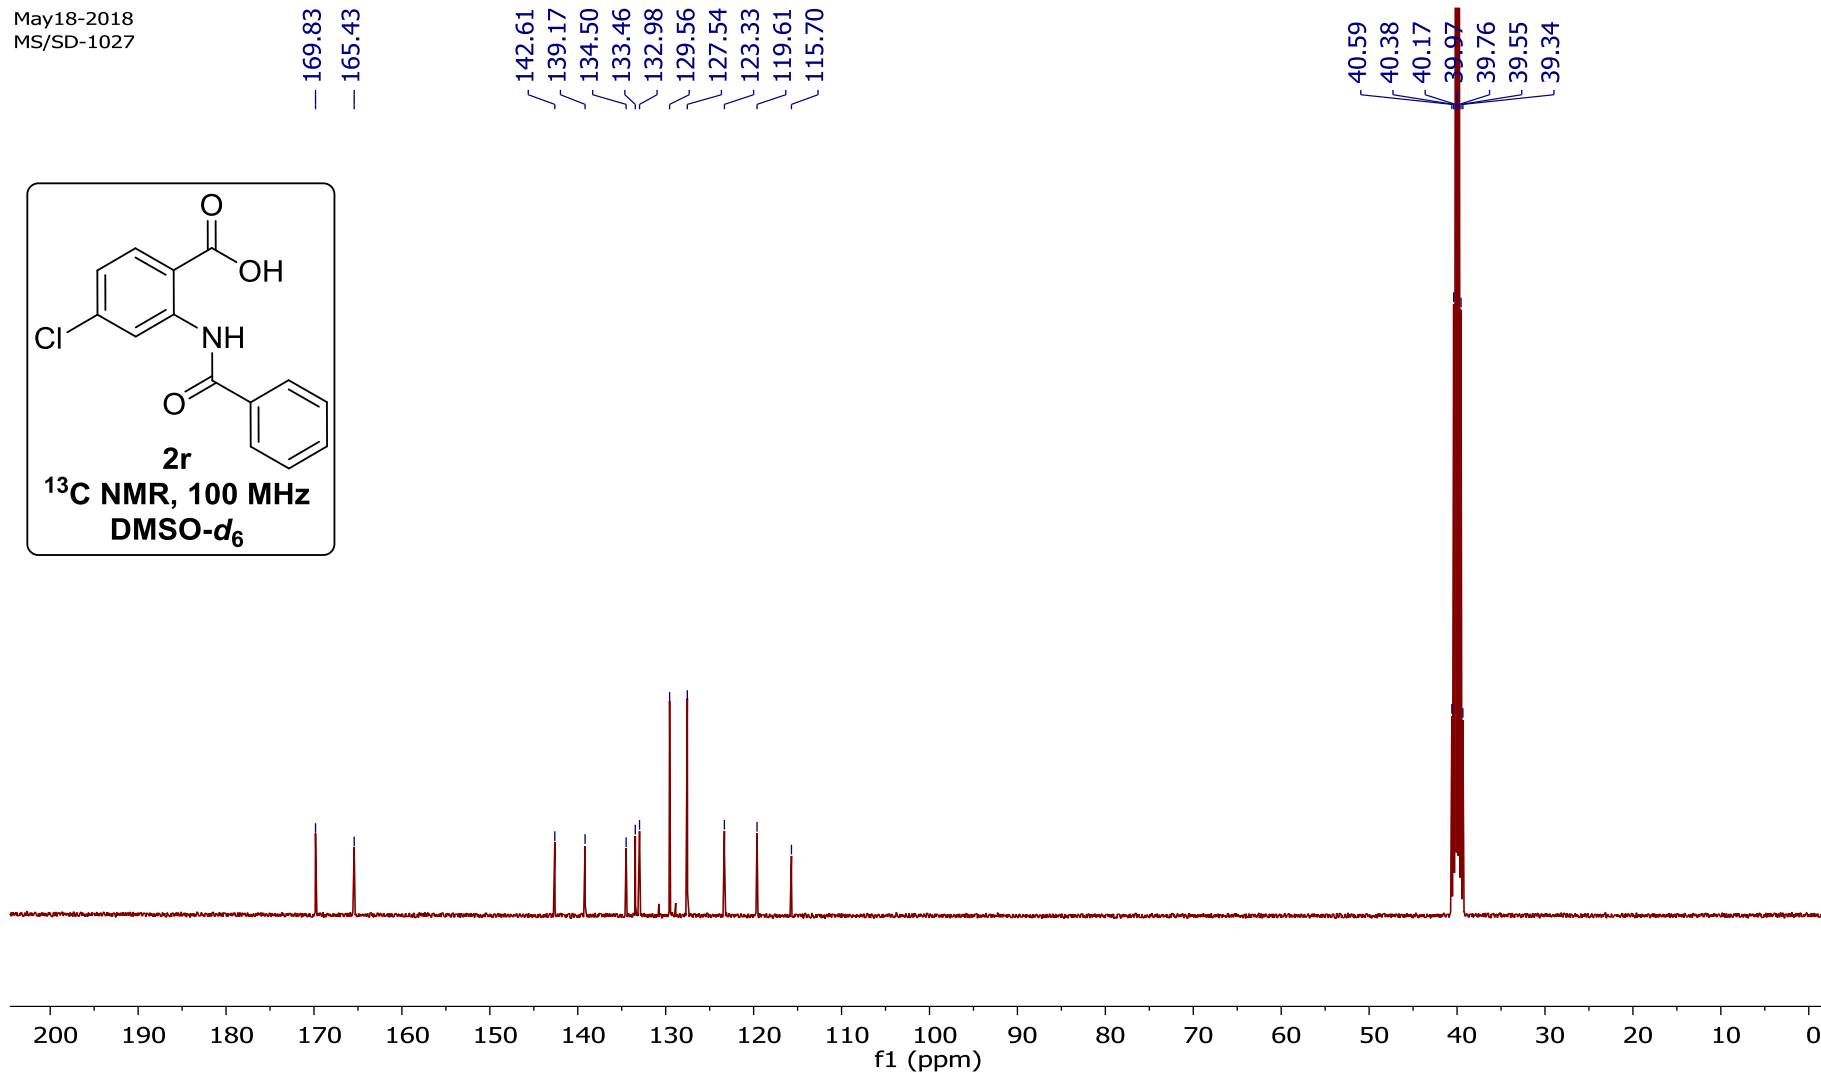

|               |              |             |                      |                 |              |                        |                       |
|---------------|--------------|-------------|----------------------|-----------------|--------------|------------------------|-----------------------|
| Sample Name   | MS-SD-1027   | Position    | P2-F8                | Instrument Name | Instrument 1 | User Name              |                       |
| Inj Vol       | 0.25         | InjPosition |                      | SampleType      | Sample       | IRM Calibration Status | Success               |
| Data Filename | MS-SD-1027.d | ACQ Method  | ChB60ChA40Dual AJS E | Comment         |              | Acquired Time          | 10/29/2018 1:36:16 PM |

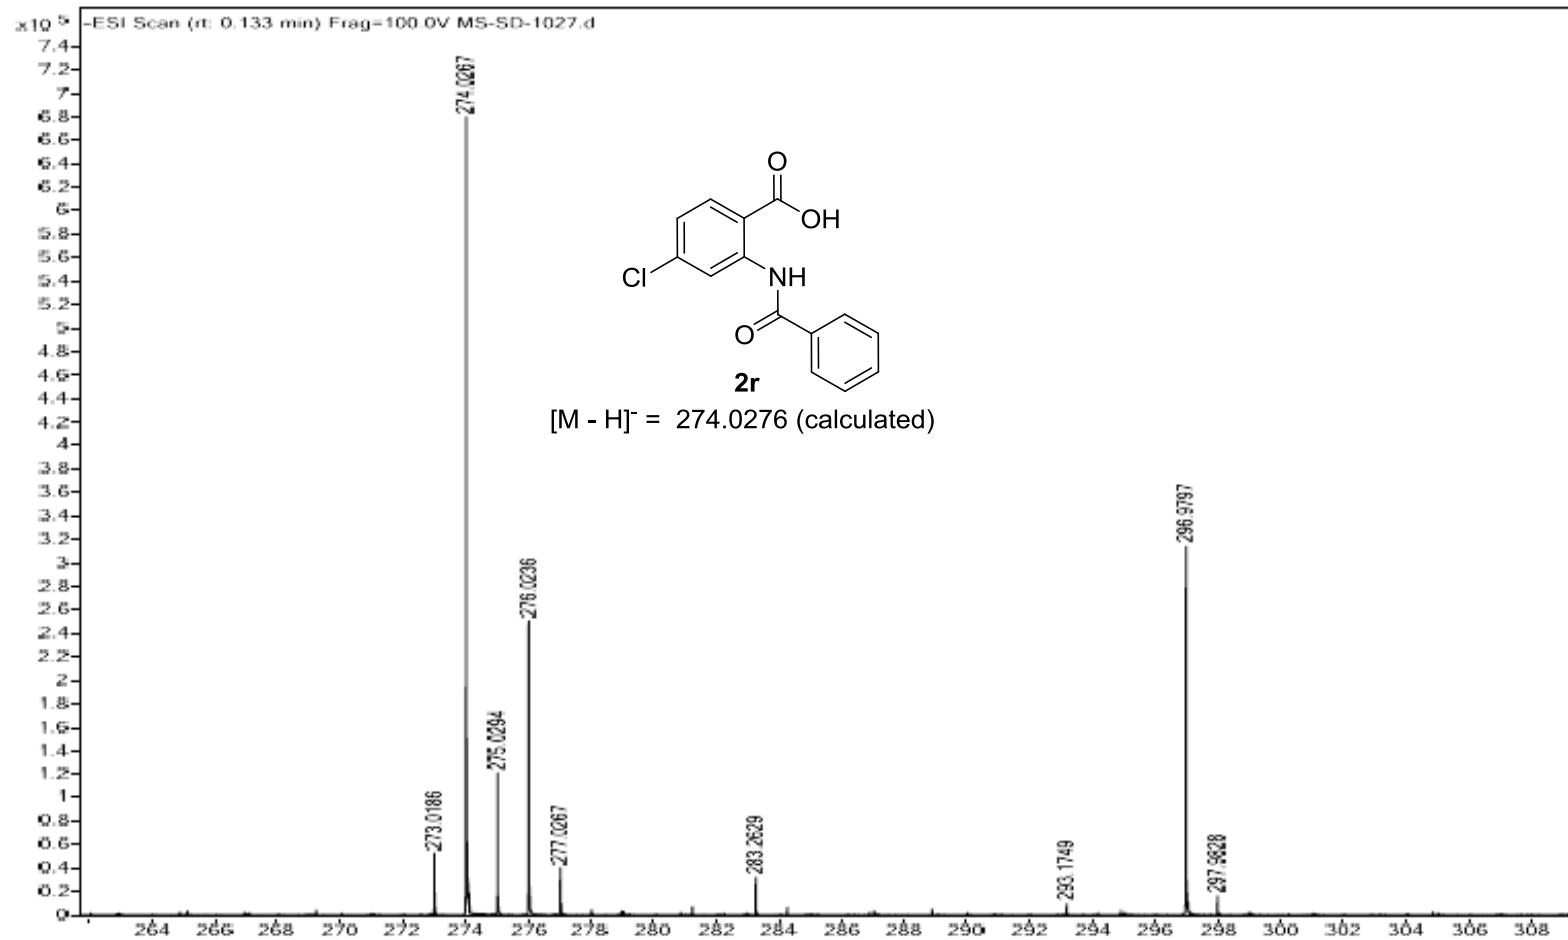



Nov29-2018/1  
OSP-ACID-56 Me

-12.1140

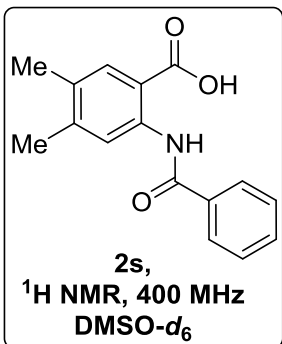

-8.5474  
7.9467  
7.9281  
7.8075  
7.6542  
7.6364  
7.6191  
7.6004  
7.5821  
7.5637

-3.4012  
2.5055  
2.5002  
2.4950  
2.2974  
2.2293

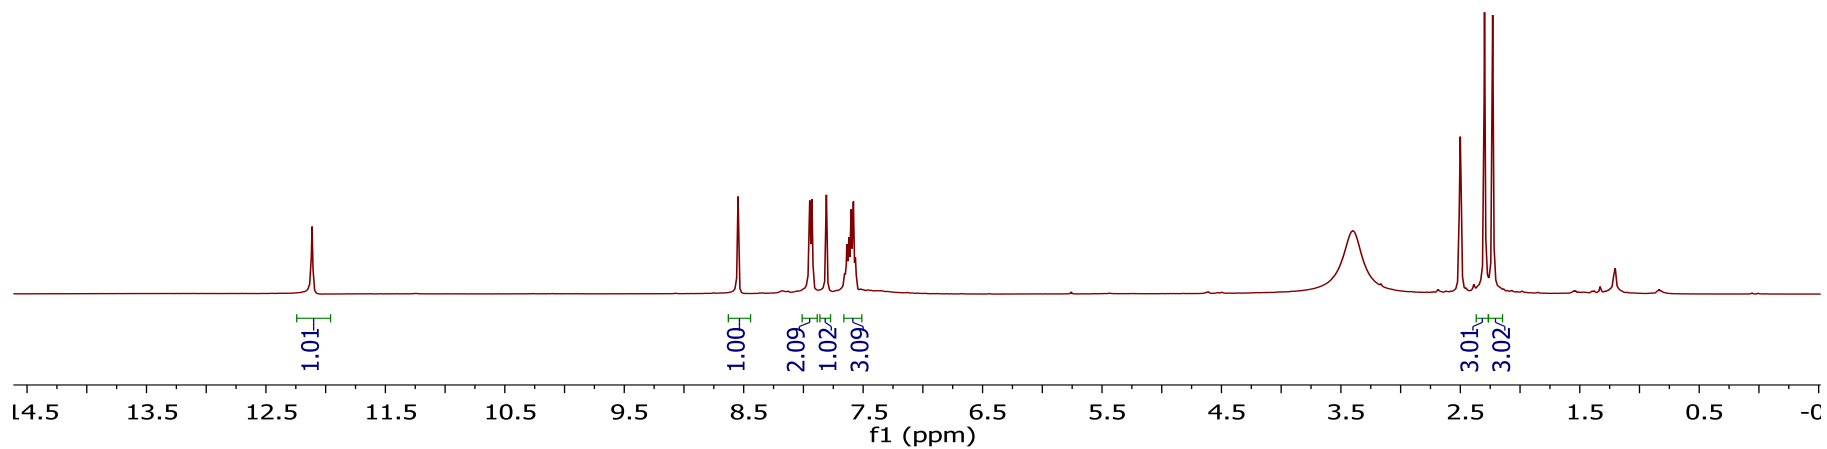

Nov29-2018/2  
OSP-ACID-56 Me

— 170.55  
— 164.83

~ 143.99  
~ 139.57  
~ 135.09  
~ 132.53  
~ 132.14  
~ 131.46  
~ 129.43  
~ 127.38  
~ 121.24  
~ 114.42

40.60  
40.39  
40.18  
39.98  
39.77  
39.56  
39.35

~ 20.64  
~ 19.20

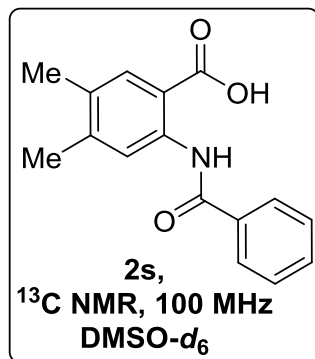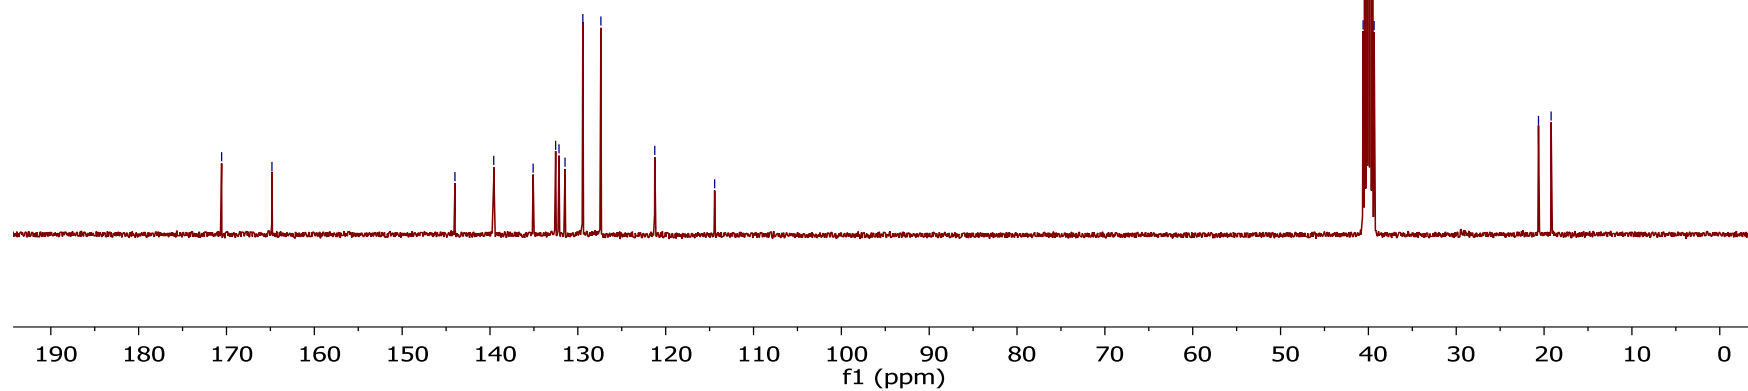

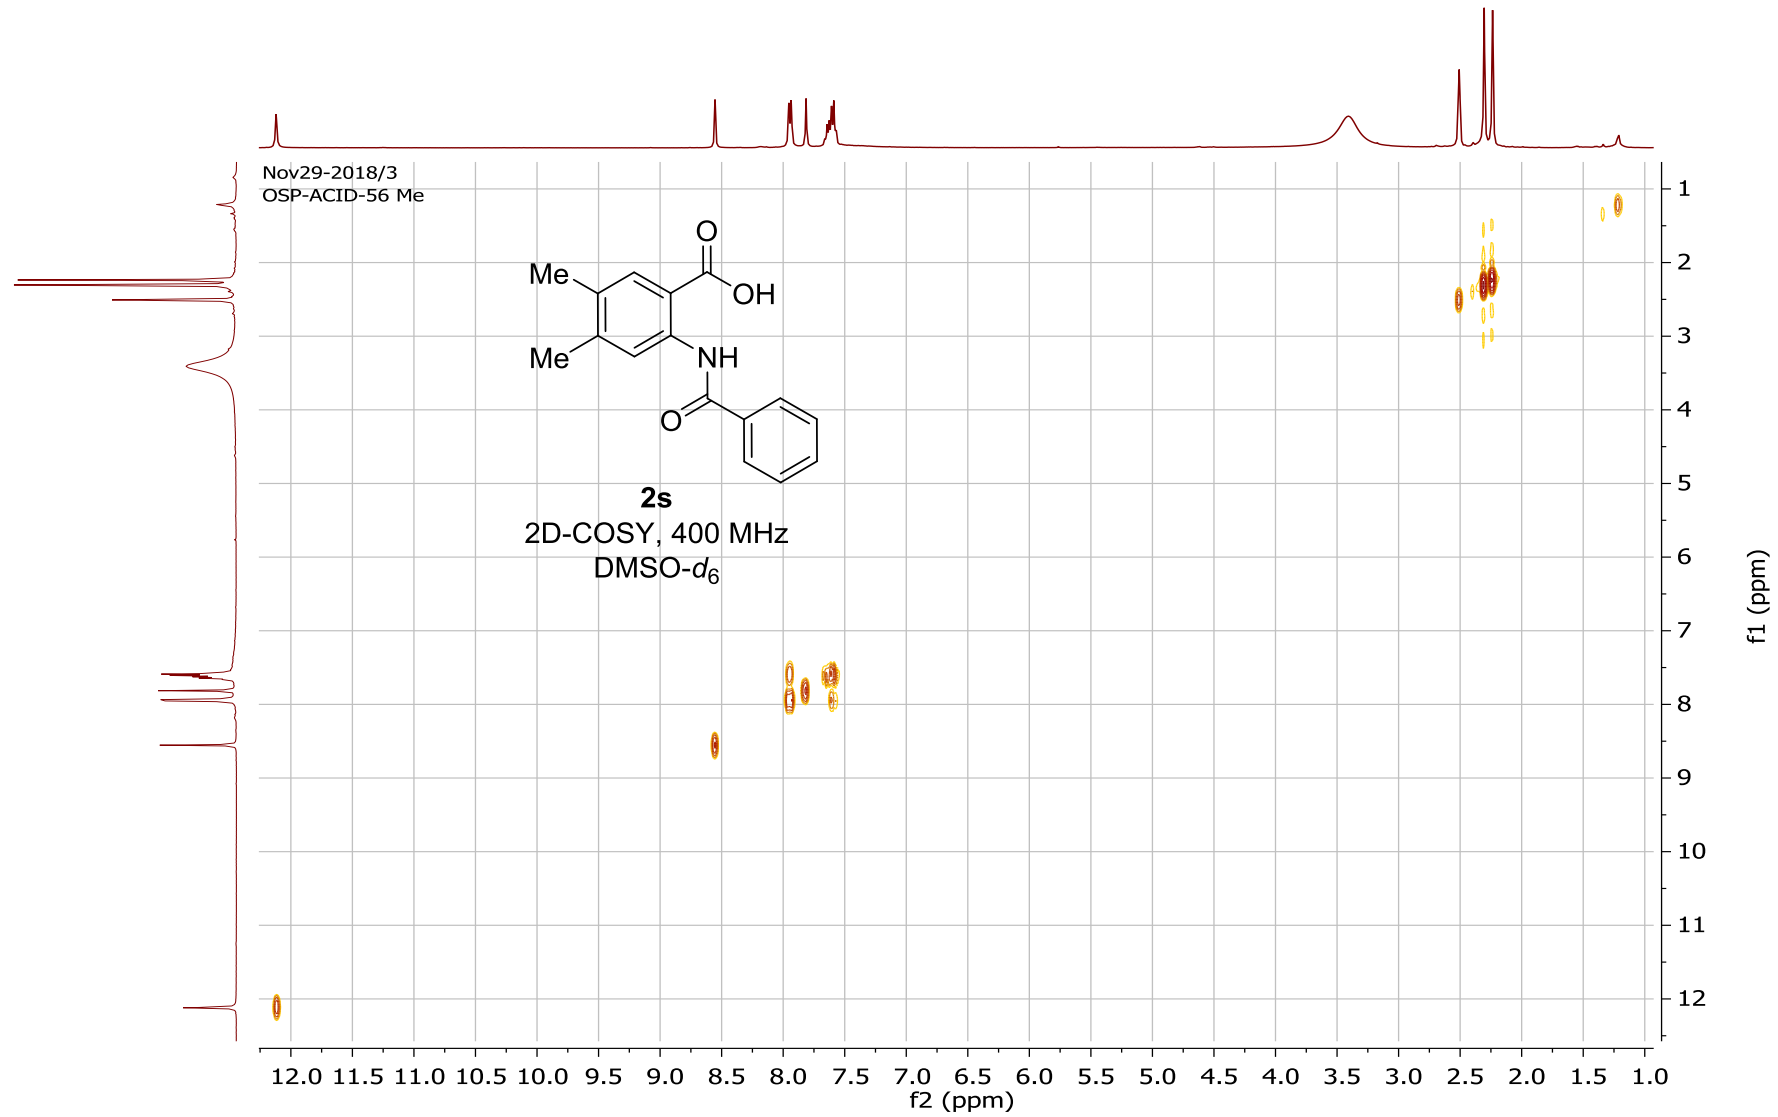

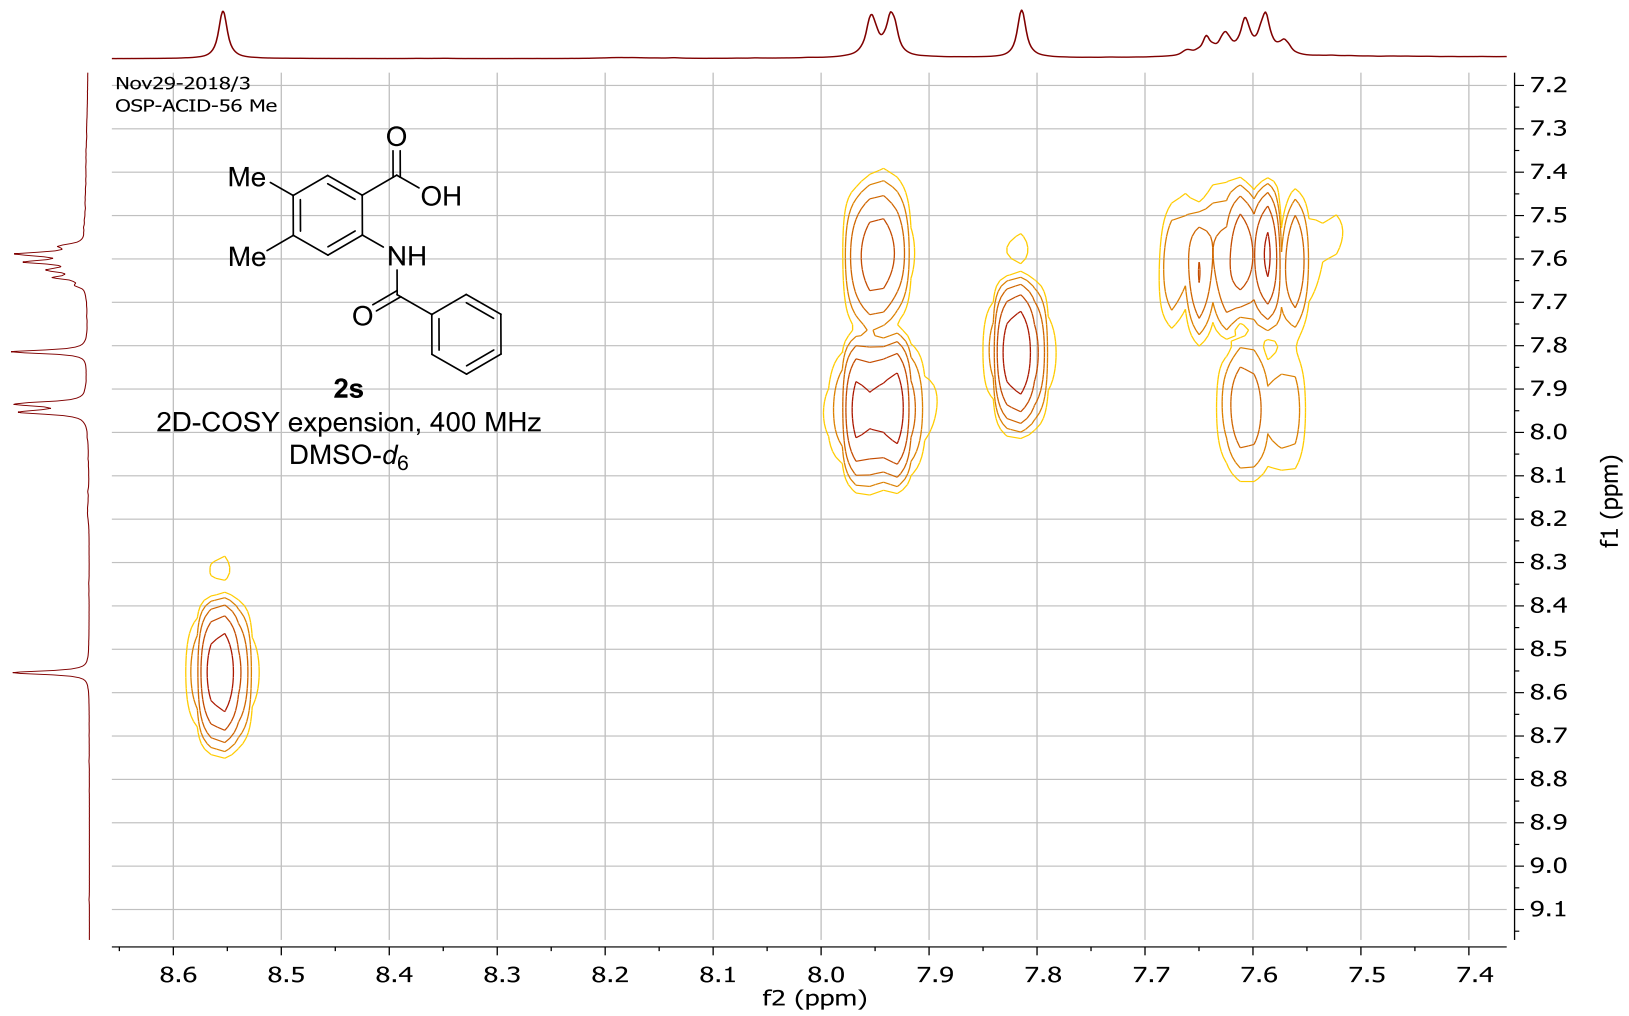

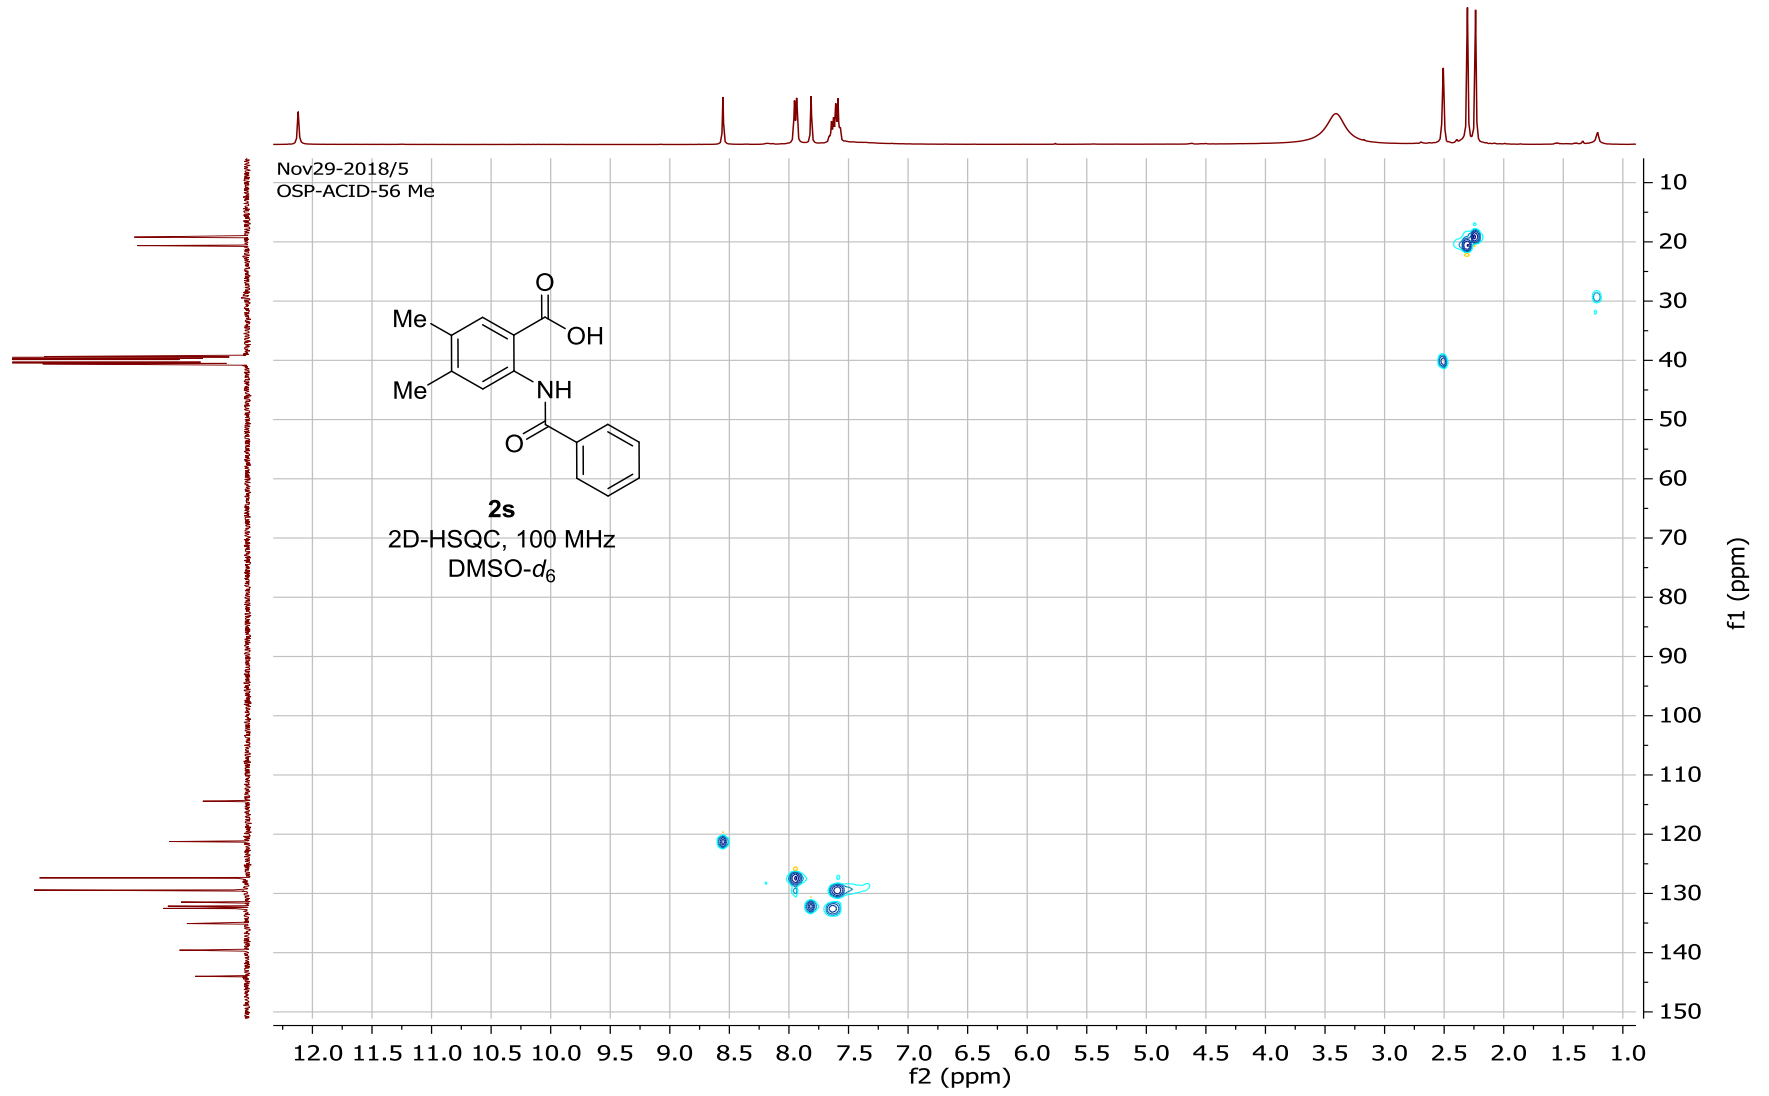

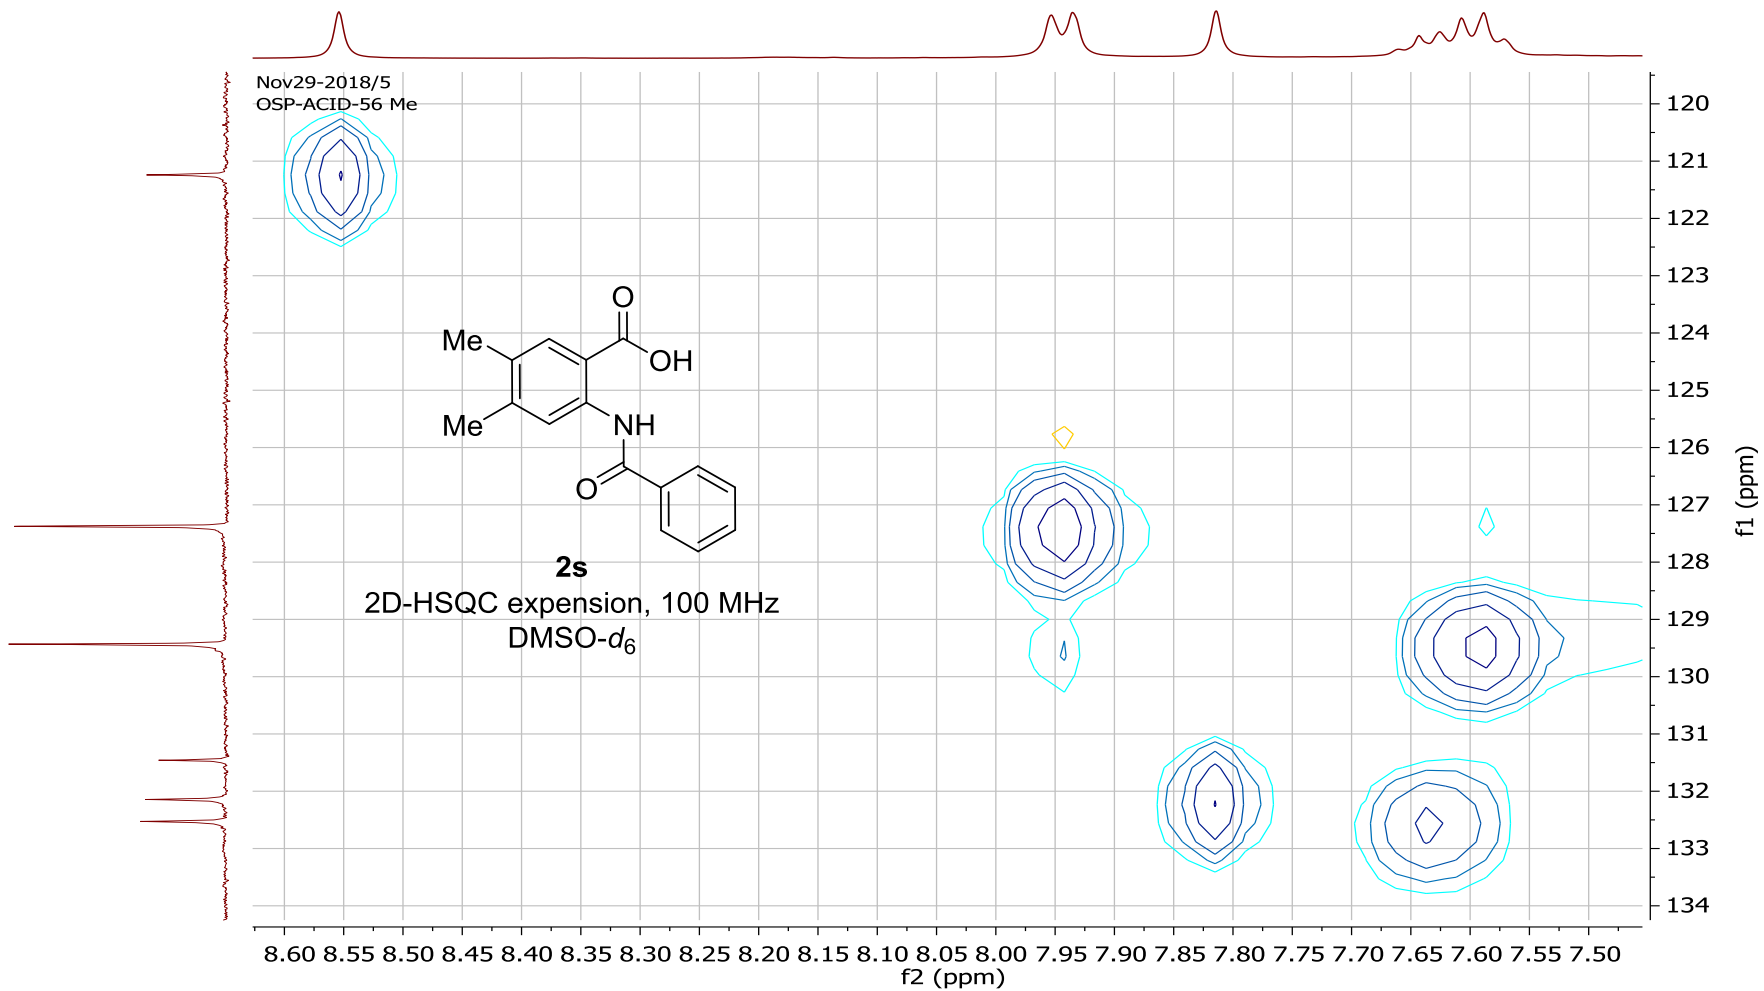

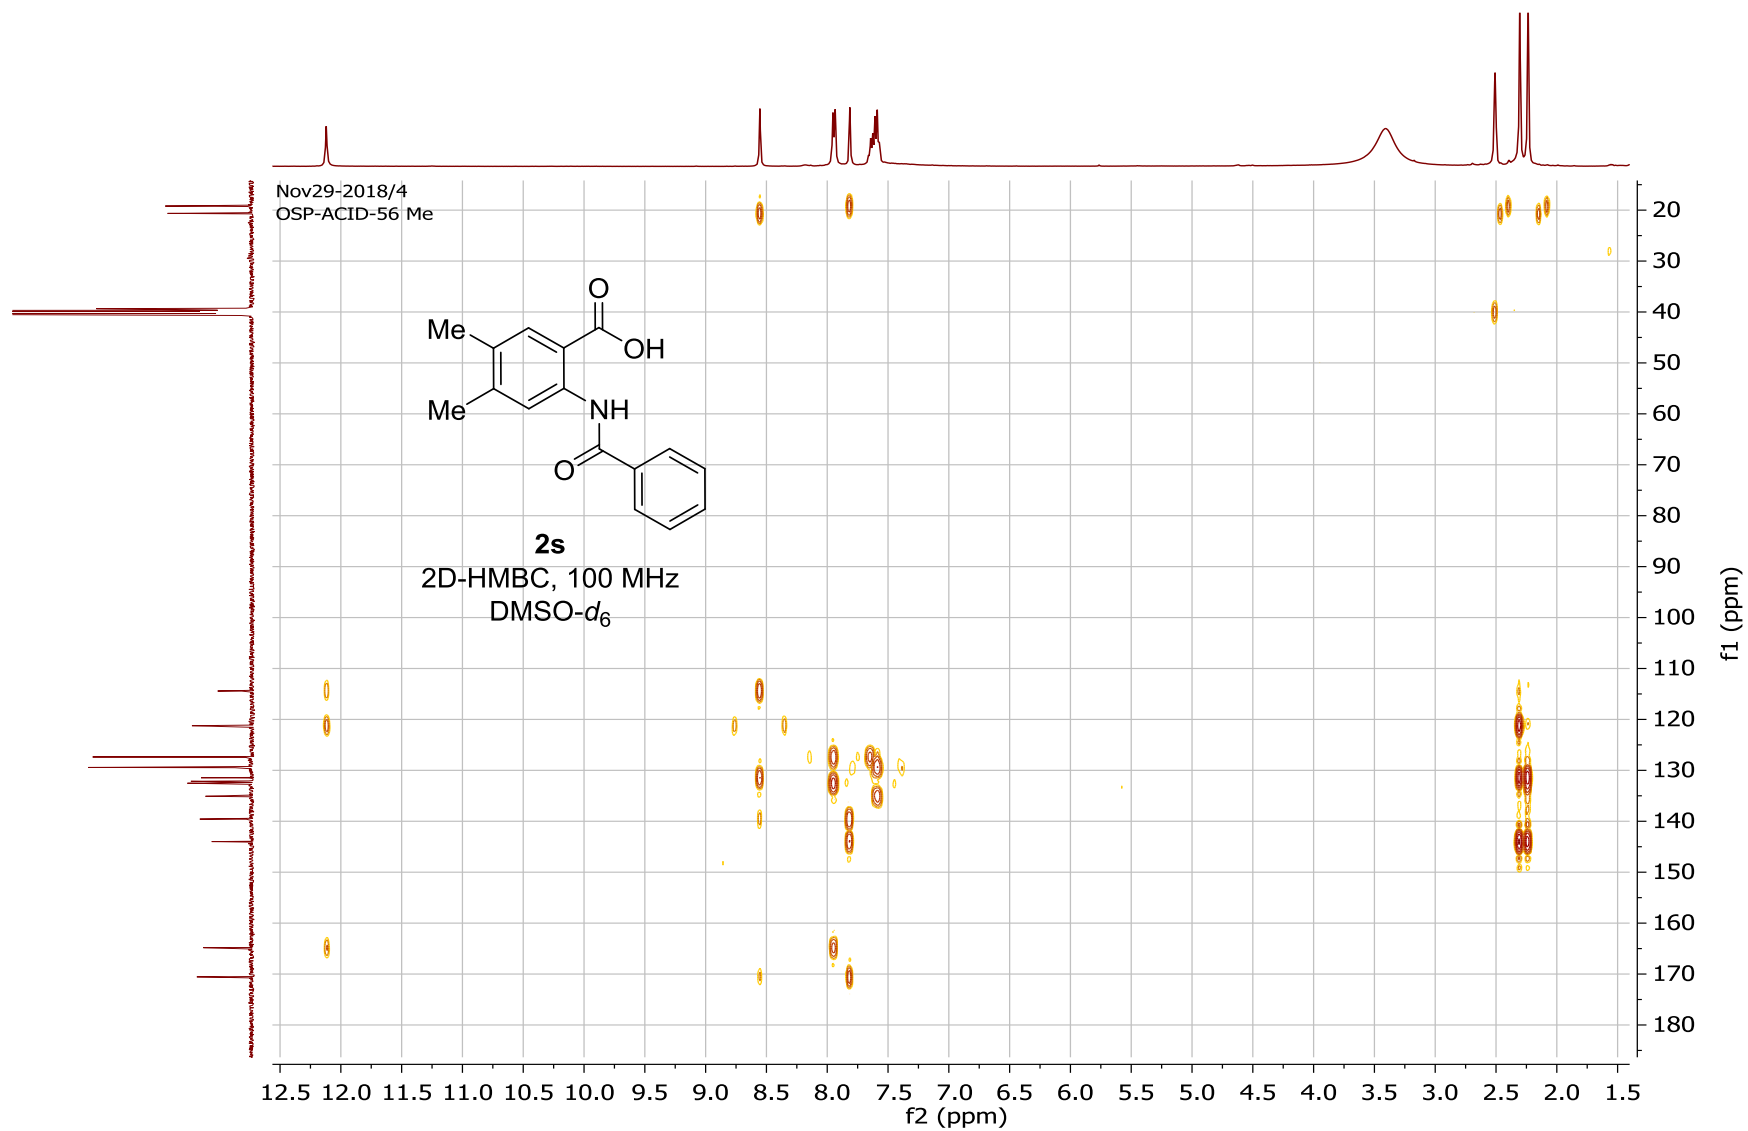

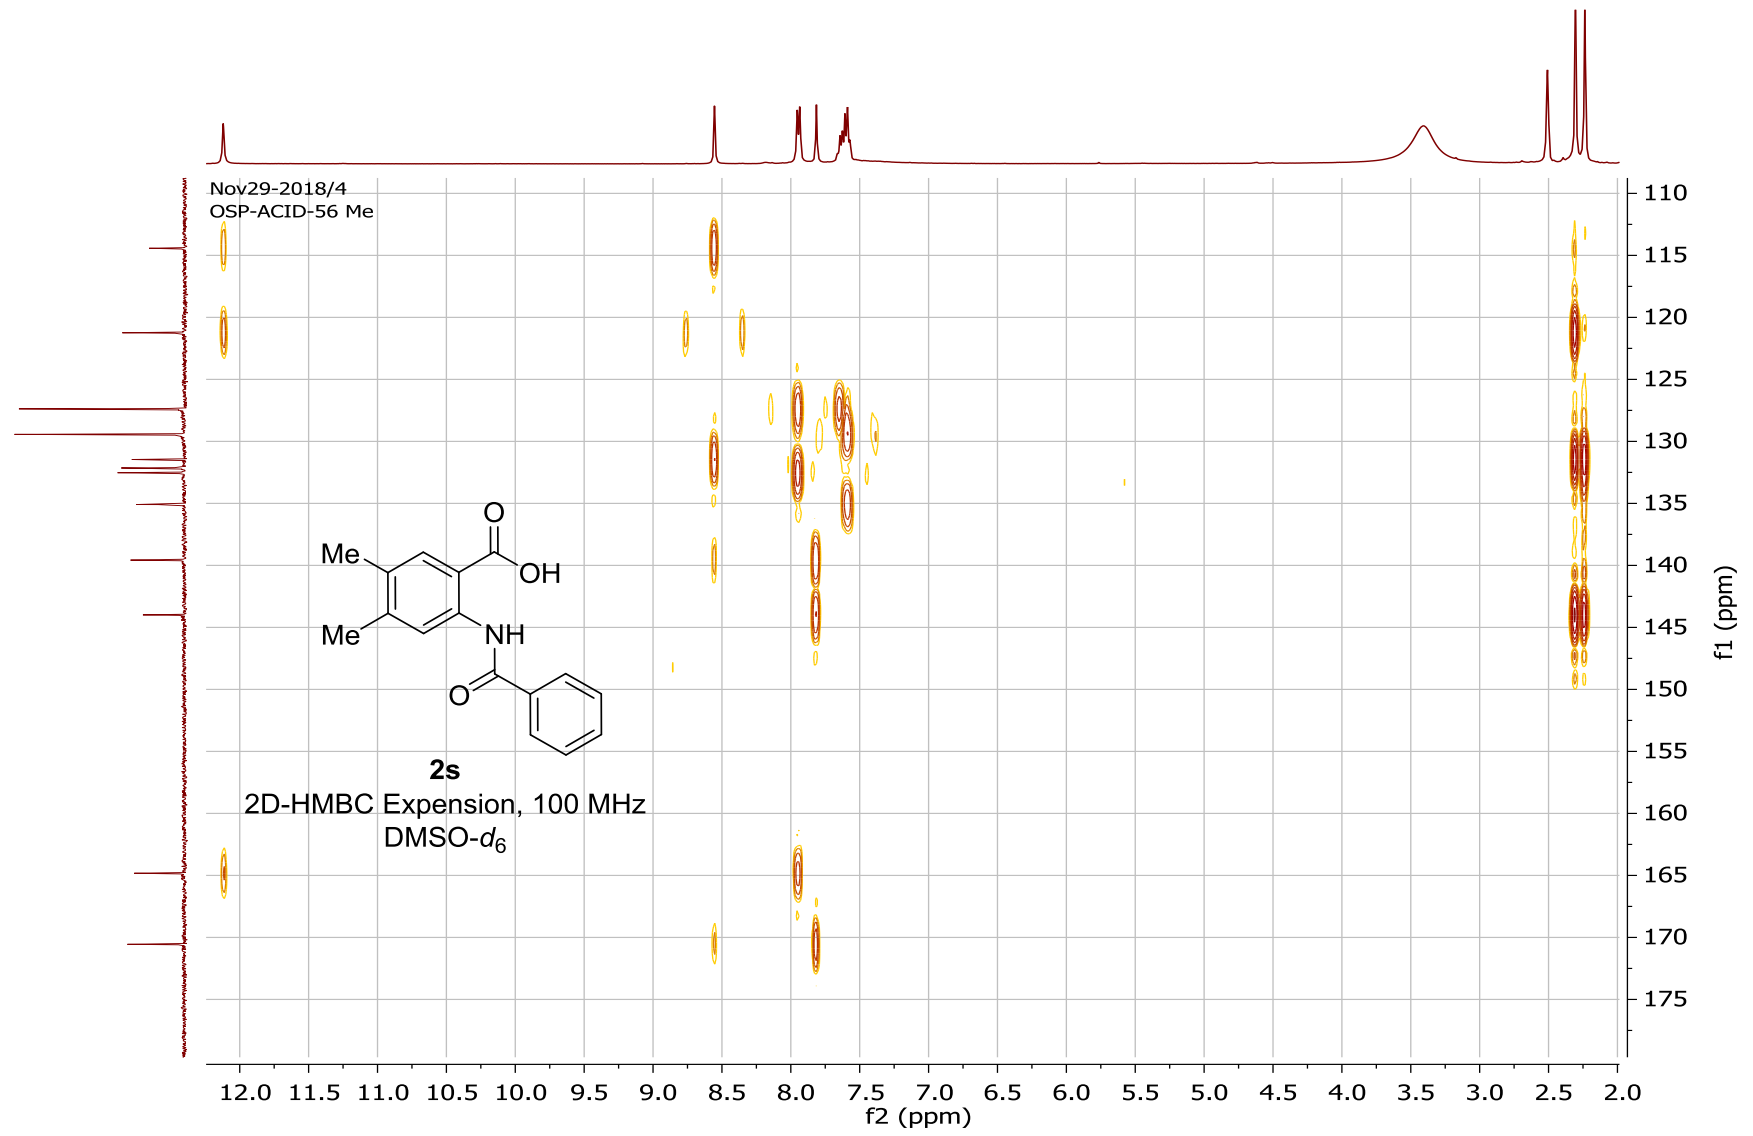



|               |               |             |                      |                 |              |                        |                     |
|---------------|---------------|-------------|----------------------|-----------------|--------------|------------------------|---------------------|
| Sample Name   | OP-add-56Me   | Position    | P1-B2                | Instrument Name | Instrument 1 | User Name              |                     |
| Inj Vol       | 0.25          | InjPosition |                      | SampleType      | Sample       | IRM Calibration Status | Success             |
| Data Filename | OP-add-56Me.d | ACQ Method  | ChB60ChD40Dual AJS E | Comment         |              | Acquired Time          | 1/2/2019 5:22:02 PM |

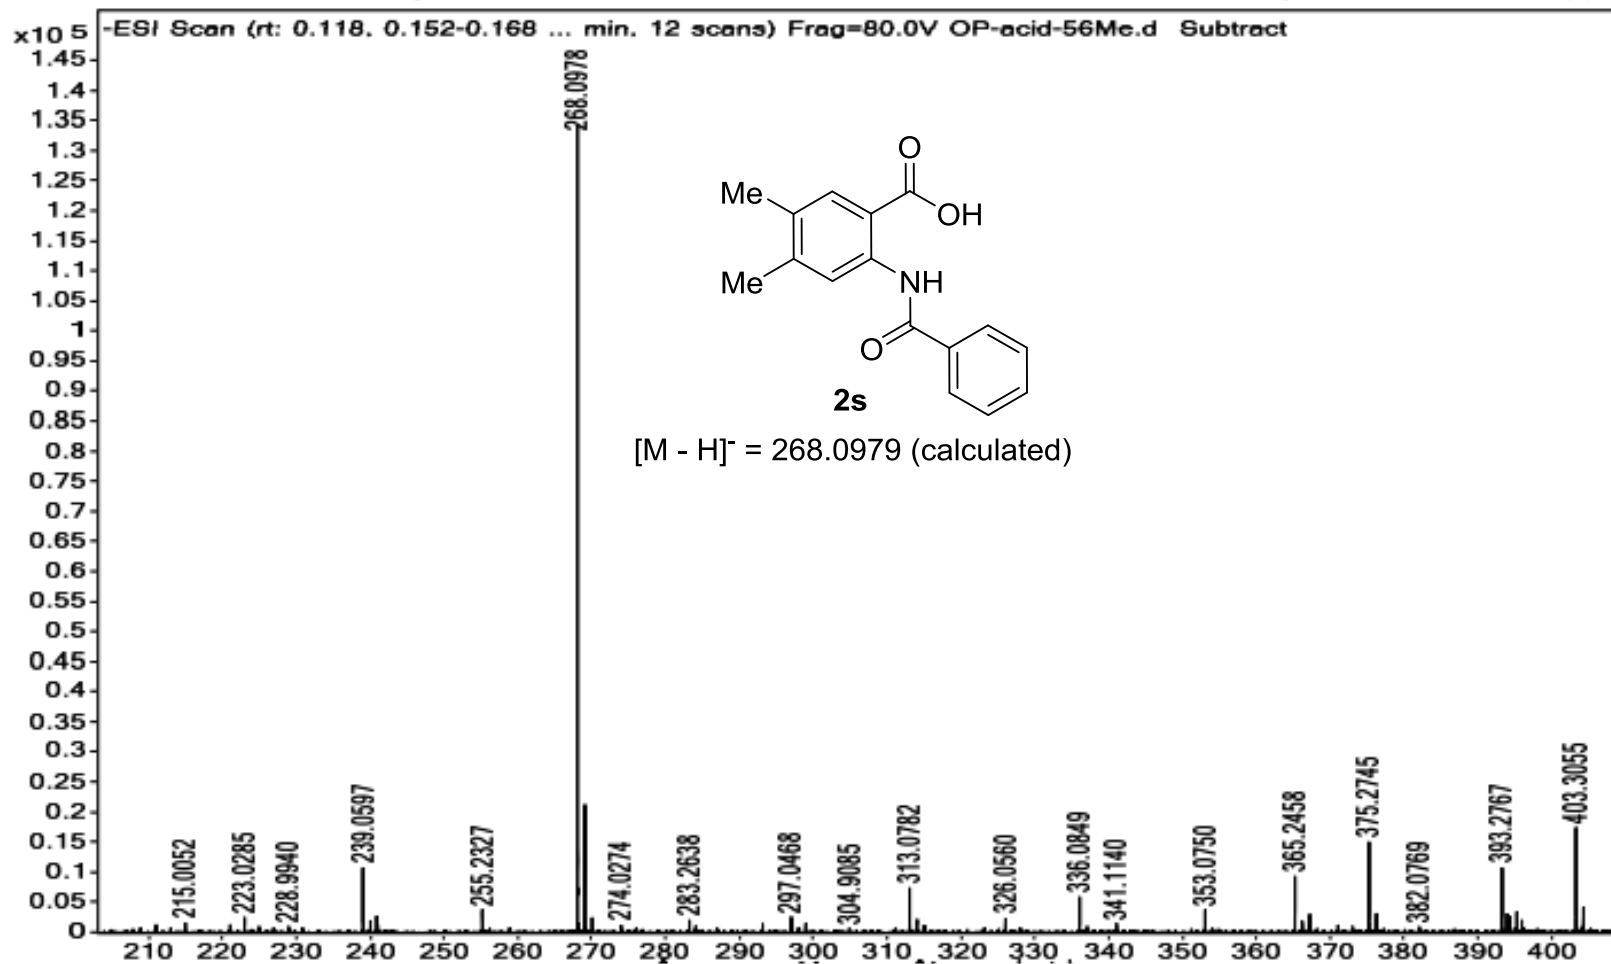

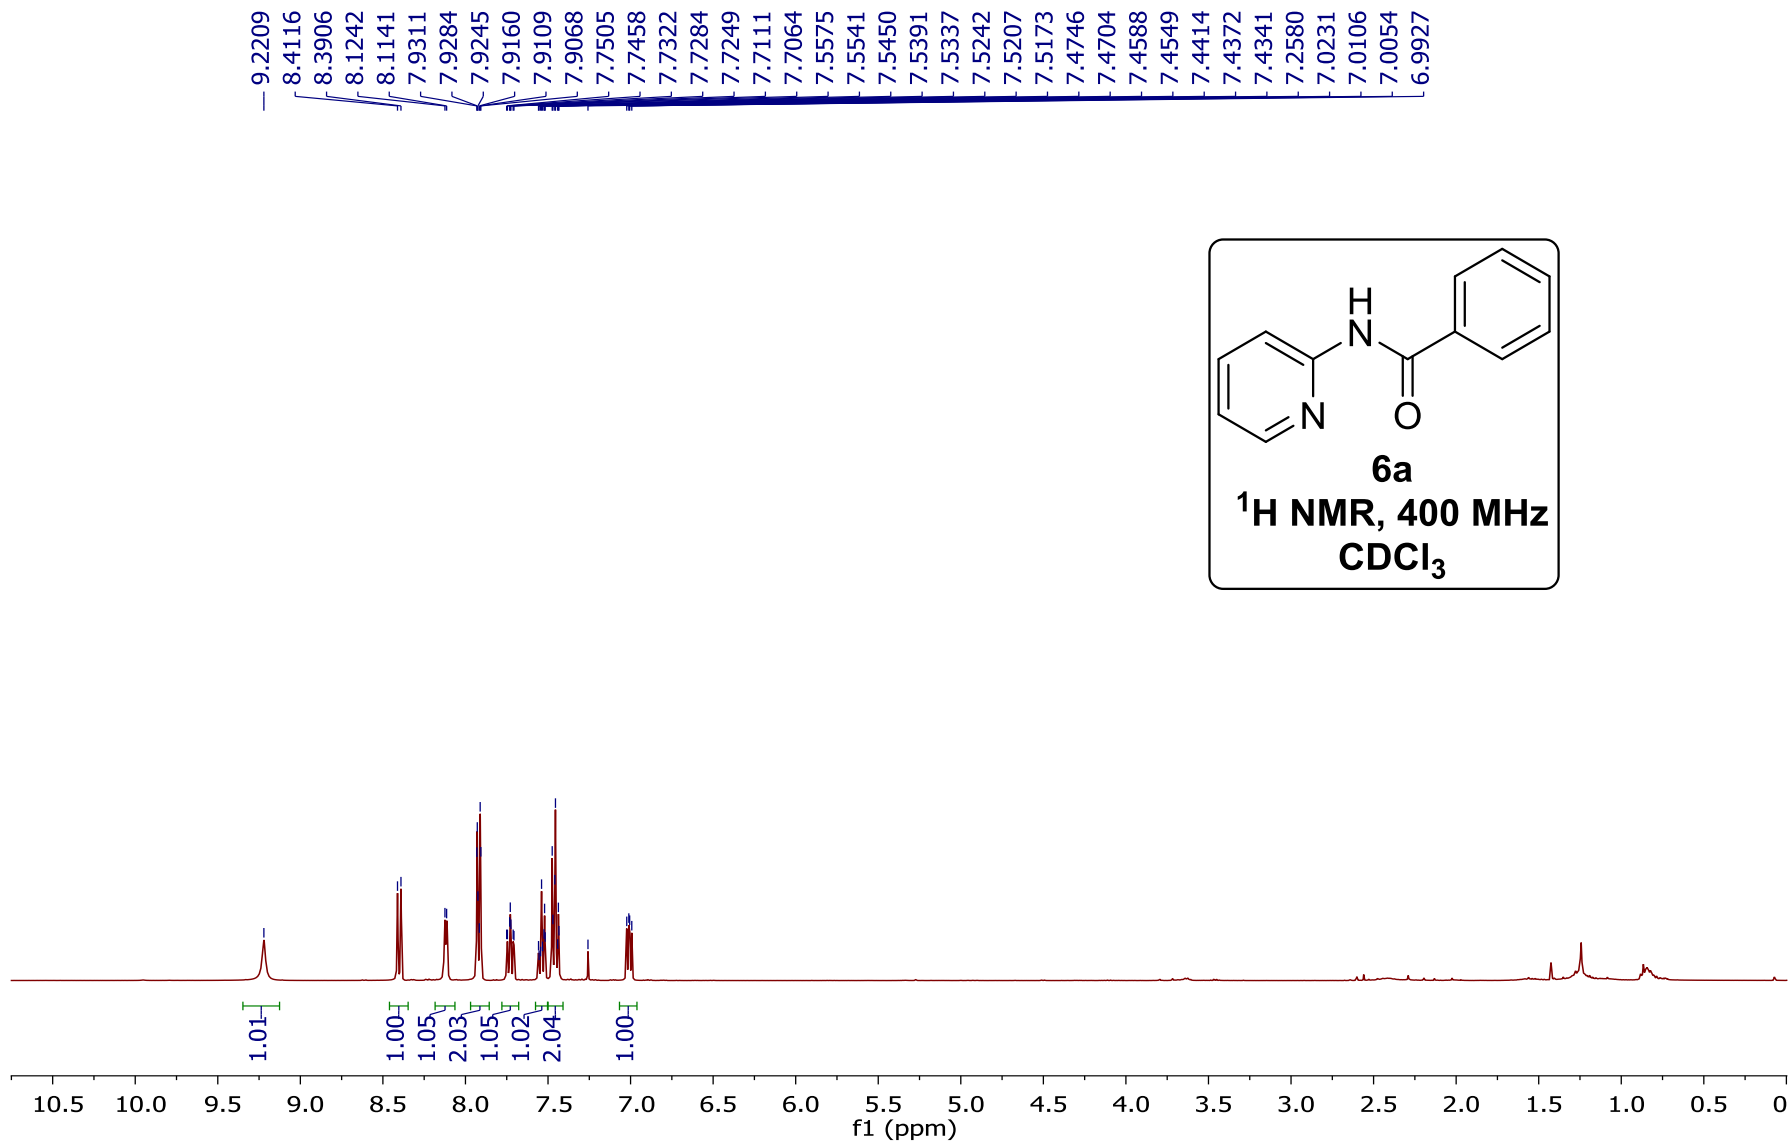

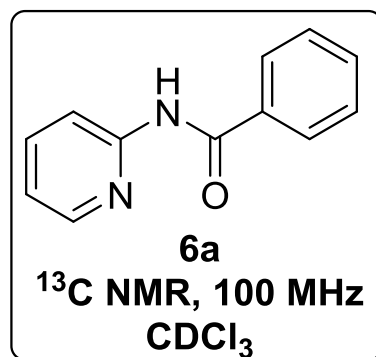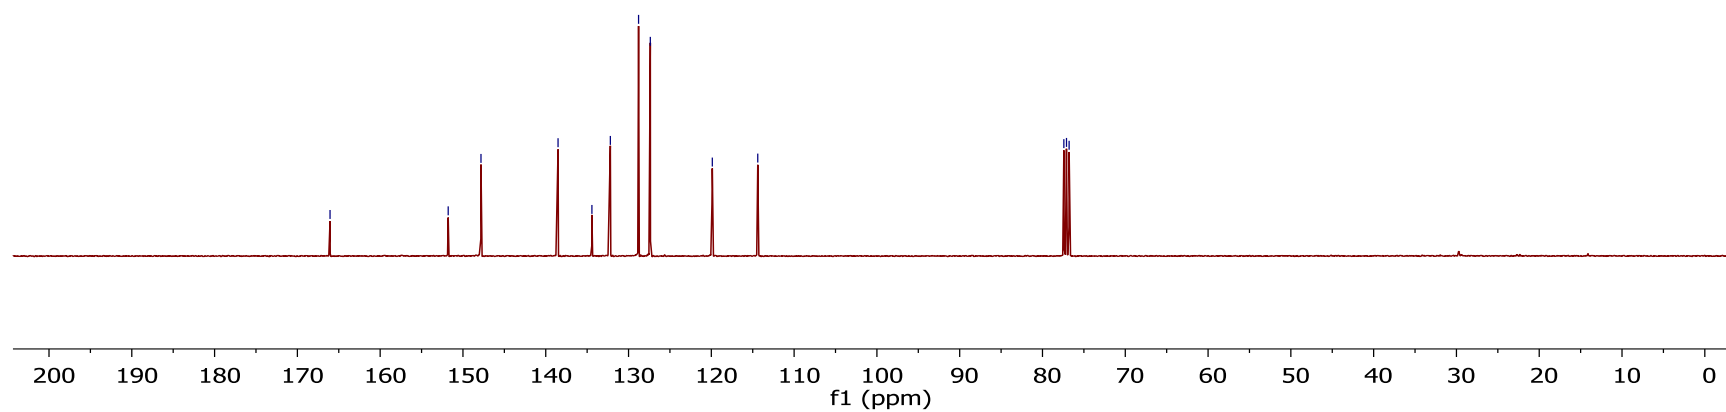

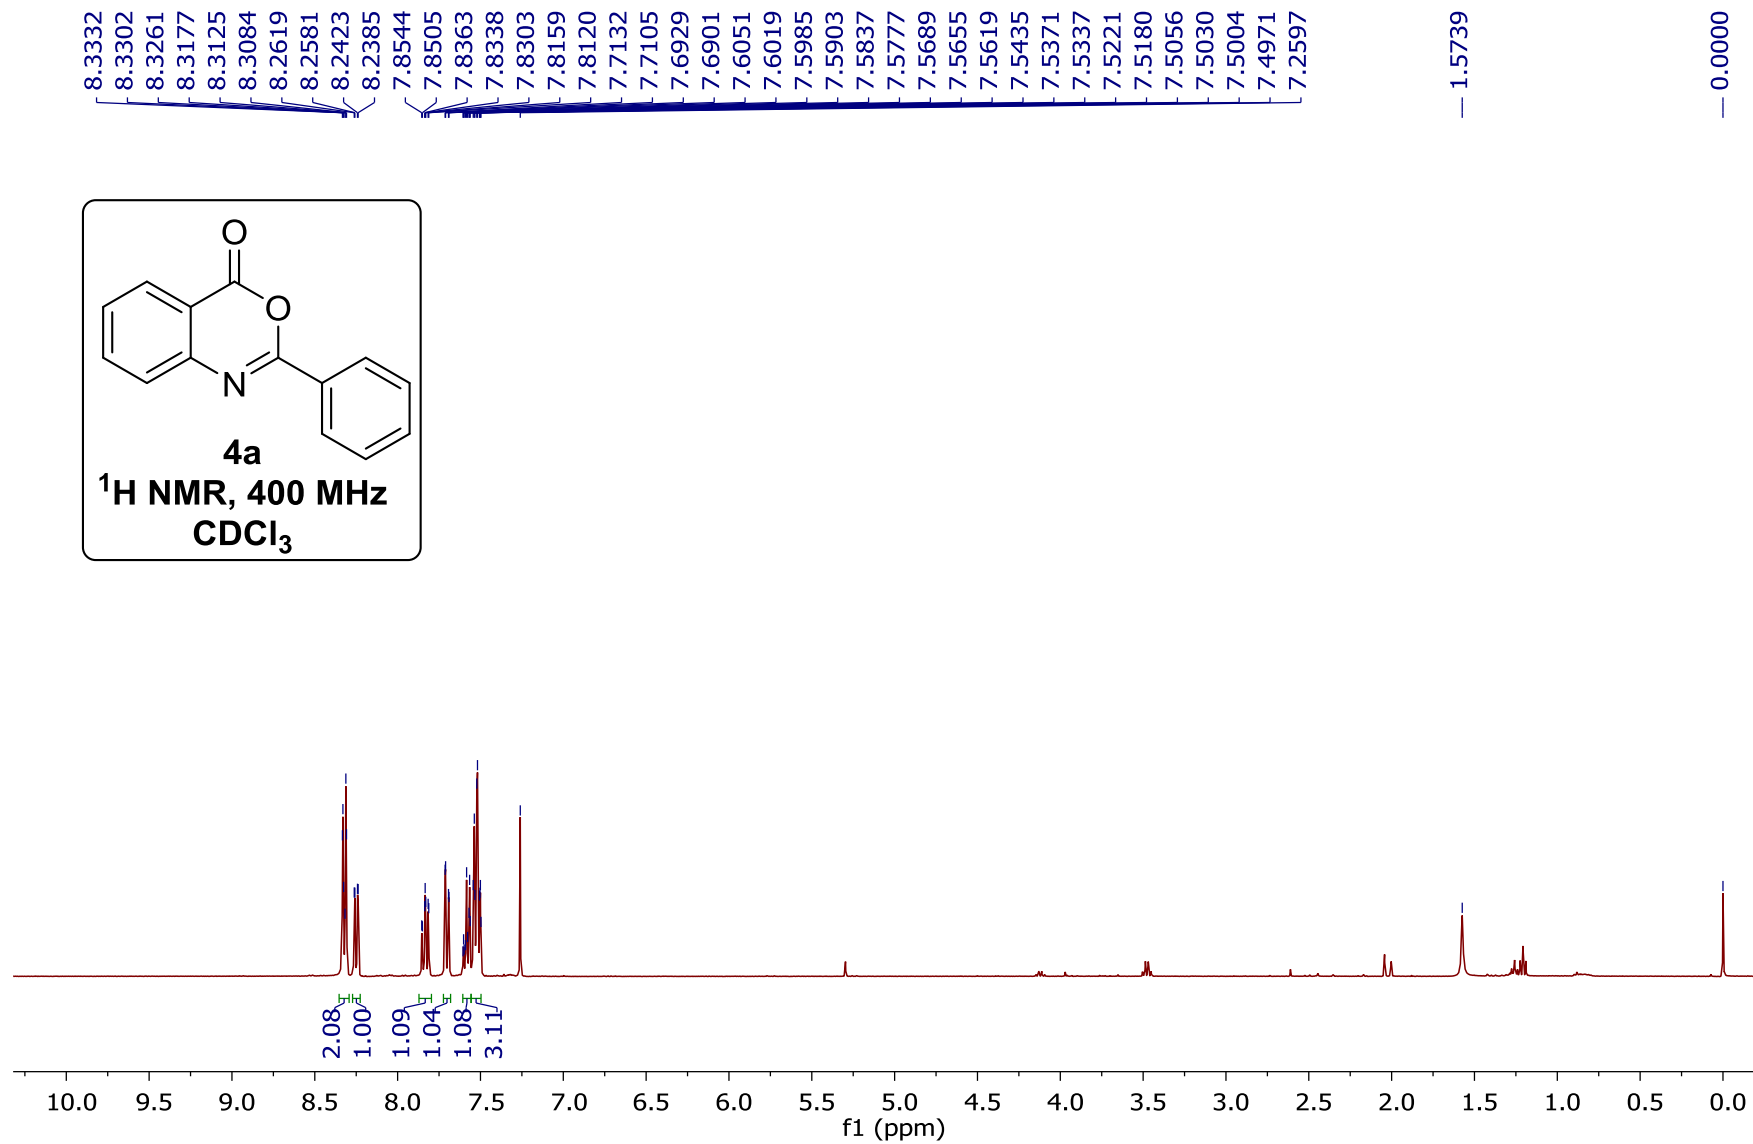

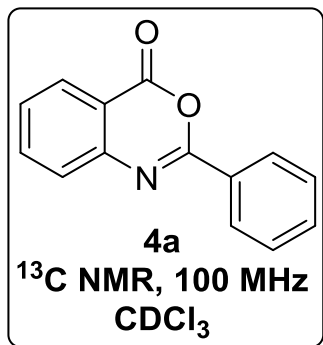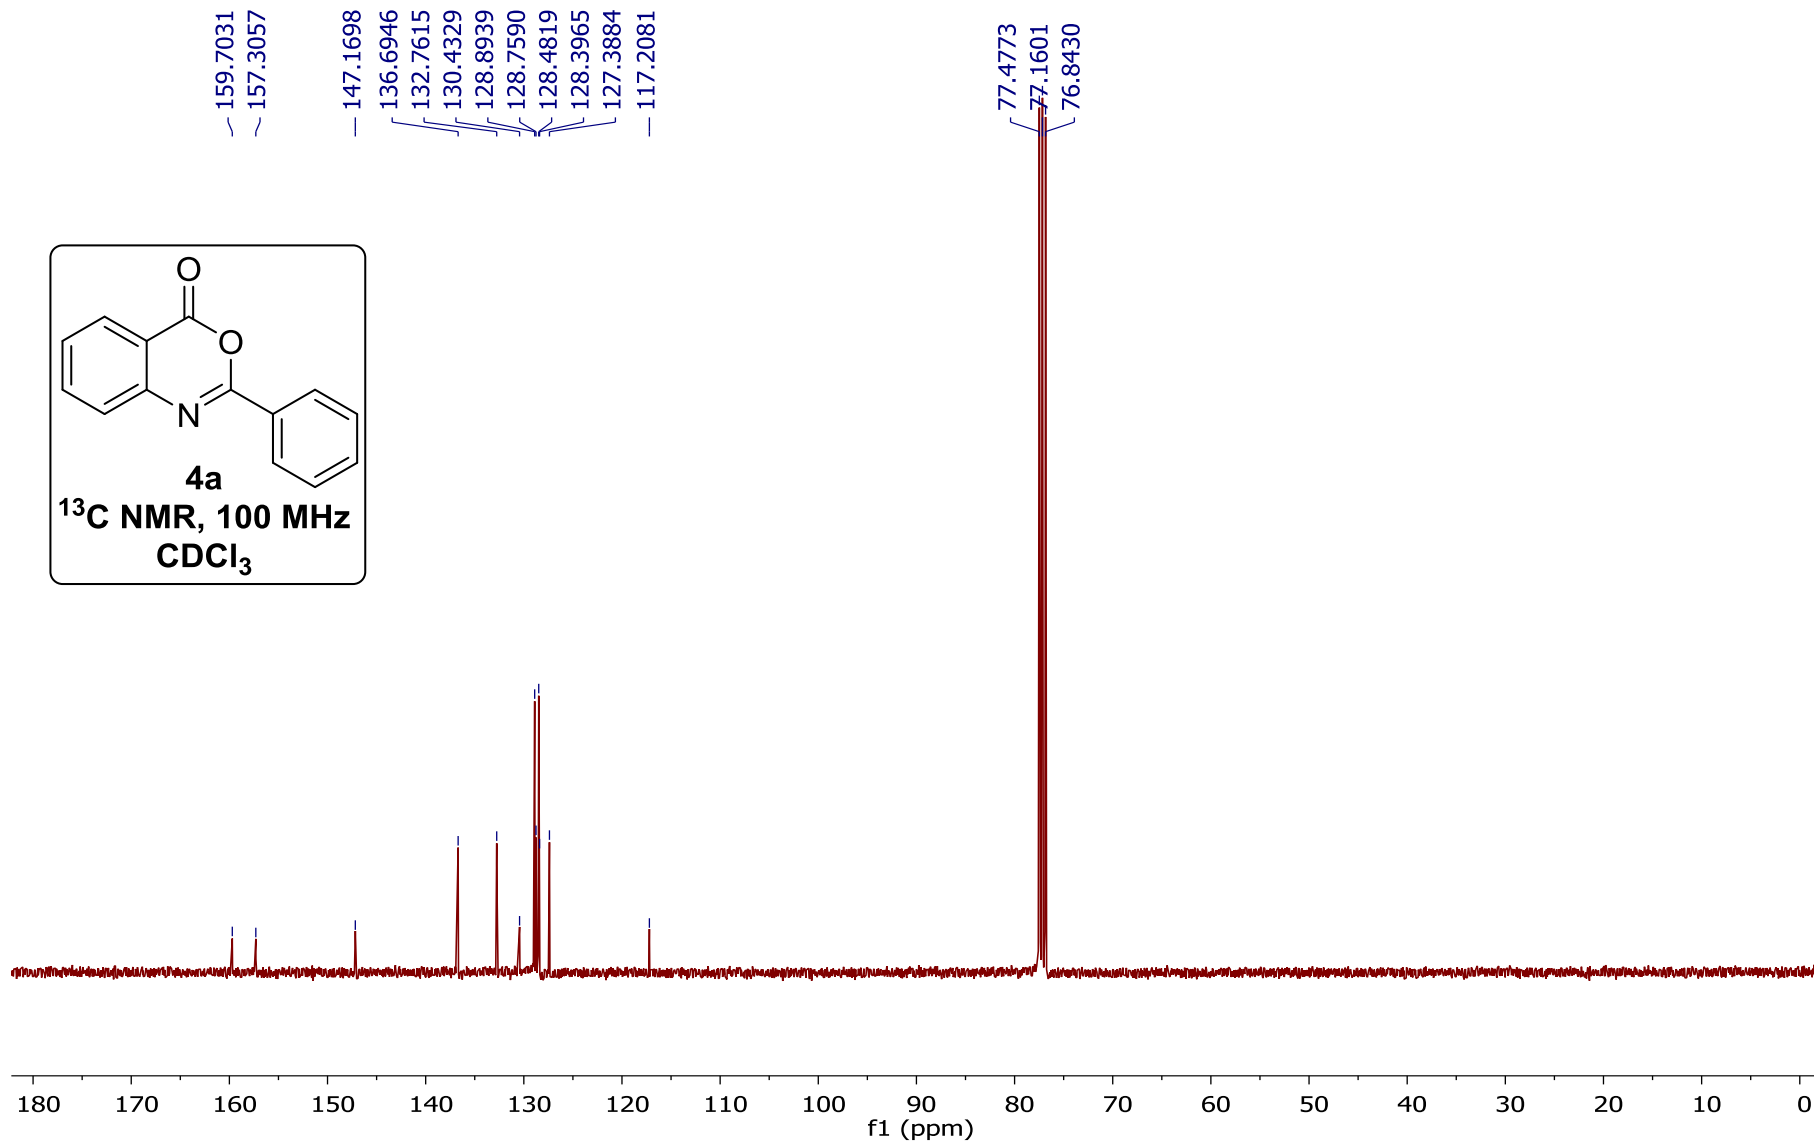

|               |           |             |                      |                 |              |                        |                      |
|---------------|-----------|-------------|----------------------|-----------------|--------------|------------------------|----------------------|
| Sample Name   | OSP-147   | Position    | P1-B7                | Instrument Name | Instrument 1 | User Name              |                      |
| Inj Vol       | 0.25      | InjPosition |                      | SampleType      | Sample       | IRM Calibration Status | Success              |
| Data Filename | OSP-147.d | ACQ Method  | water_acn_grad_6min_ | Comment         |              | Acquired Time          | 4/3/2018 12:51:51 PM |

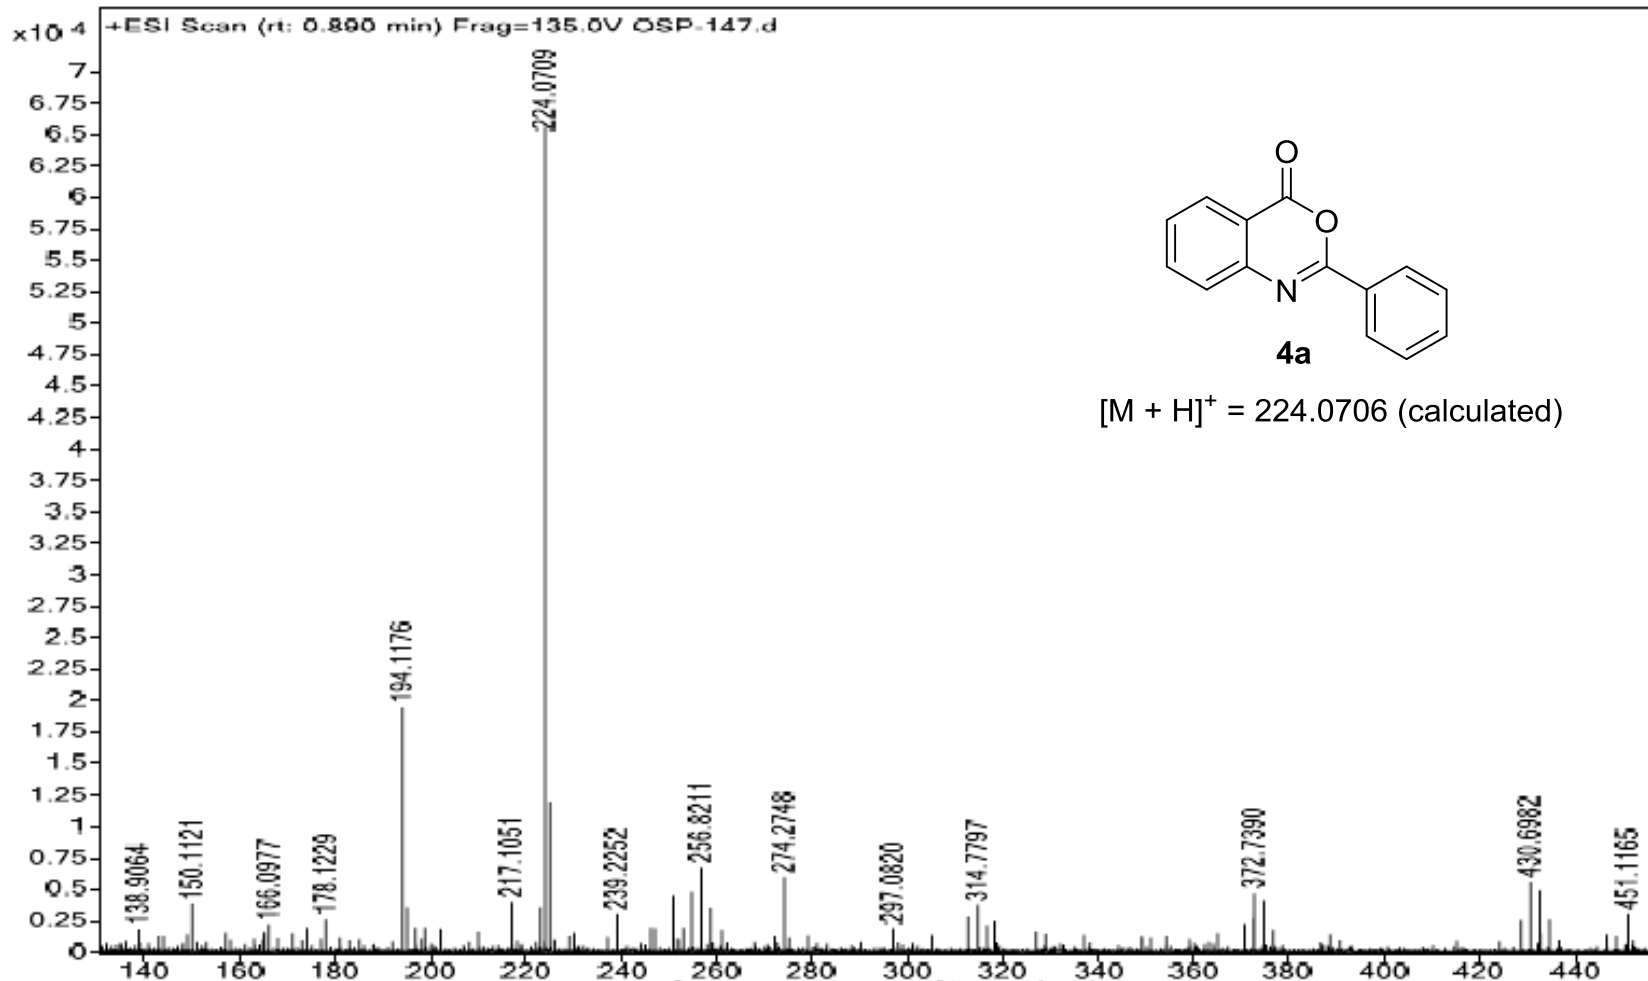

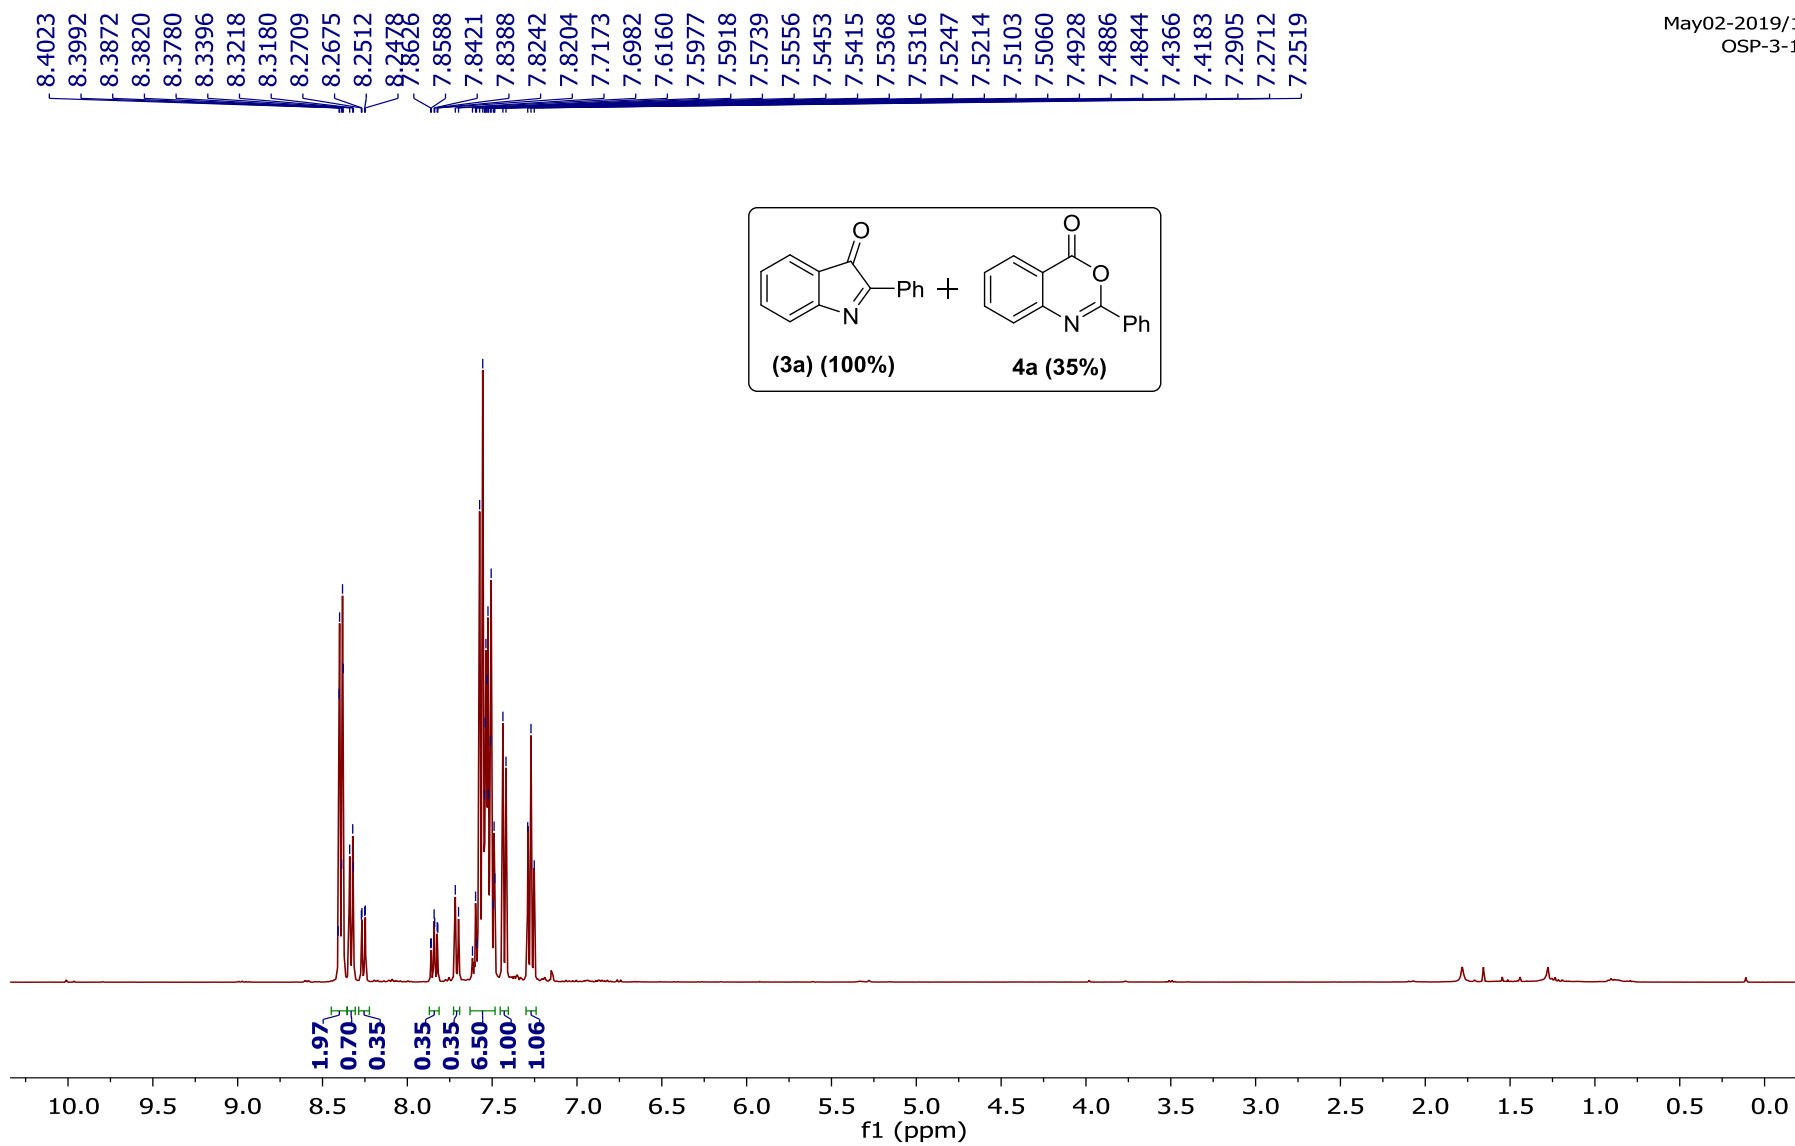

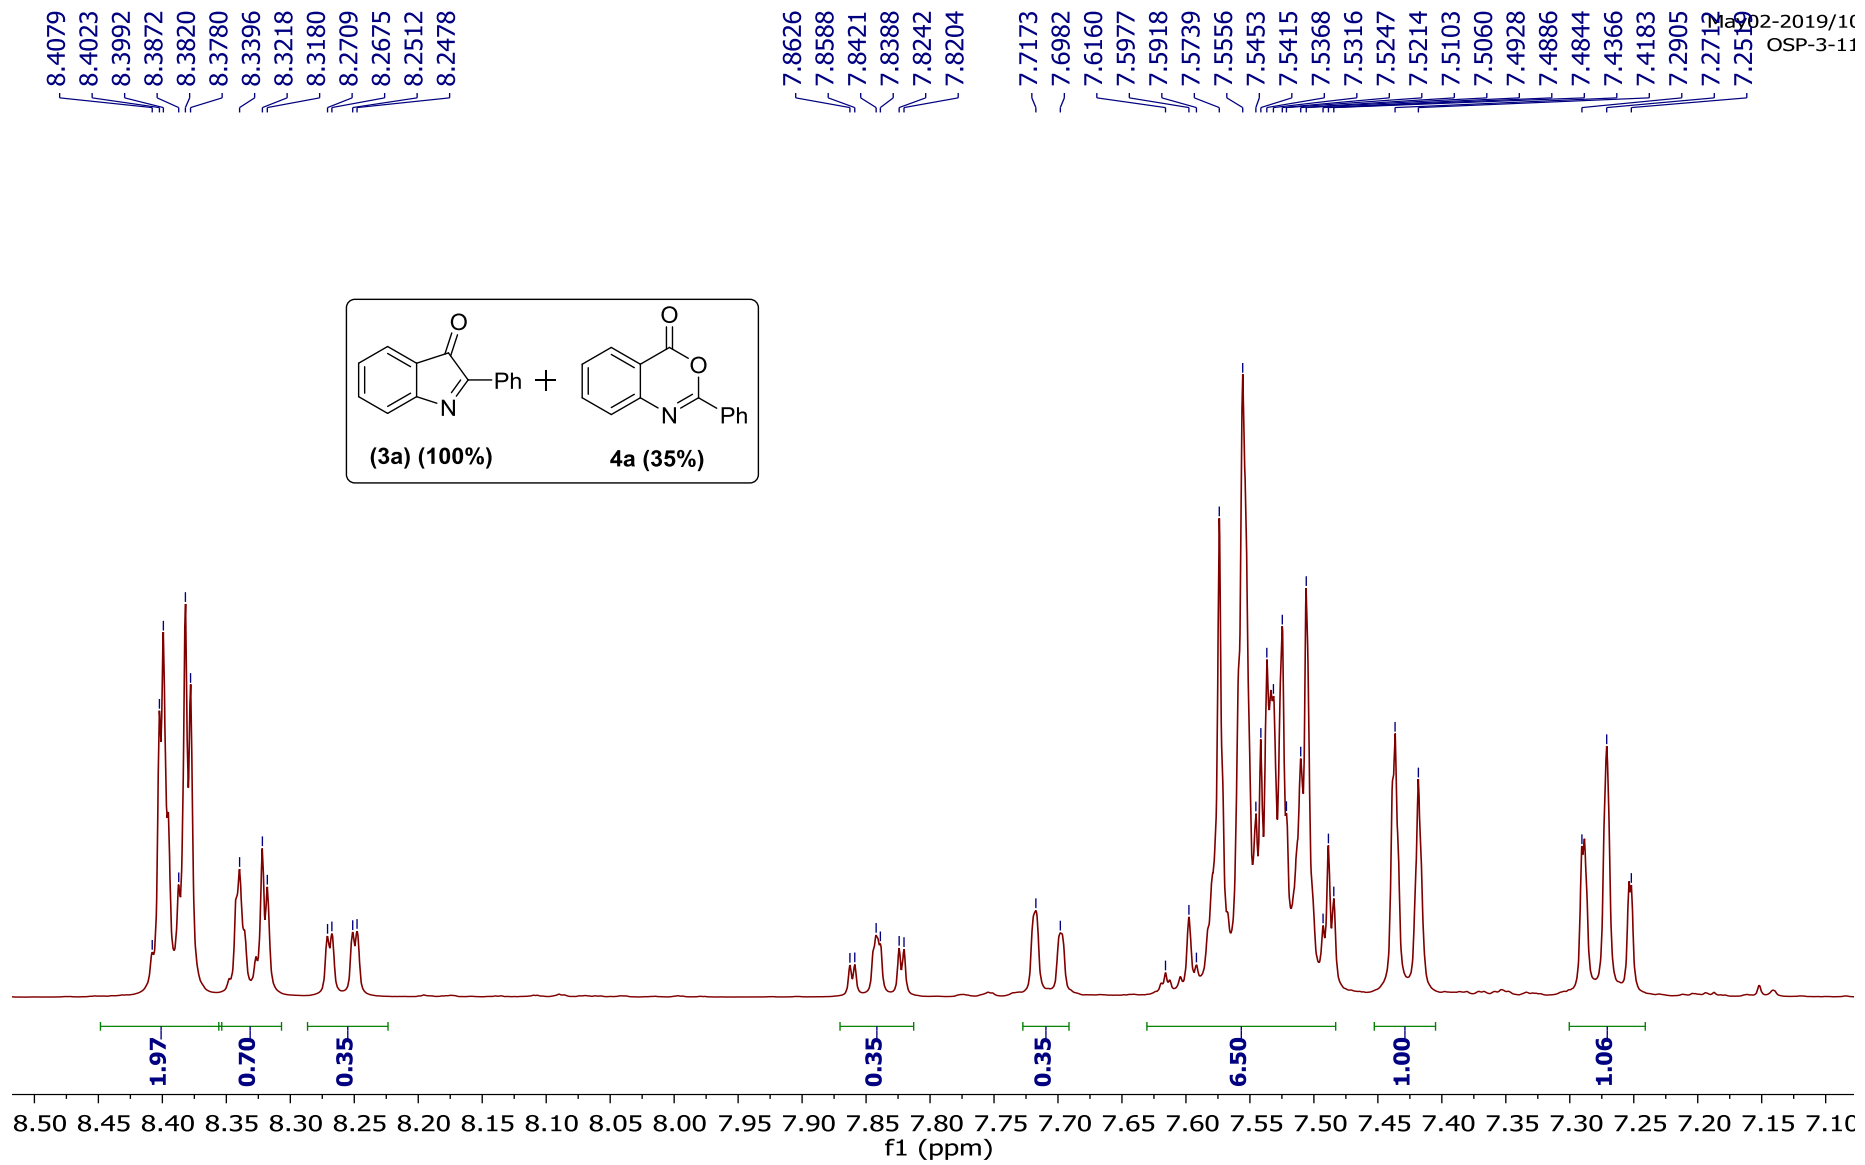

02-2019/10  
OSP-3-11



May03-2019/3  
OSP-3-11

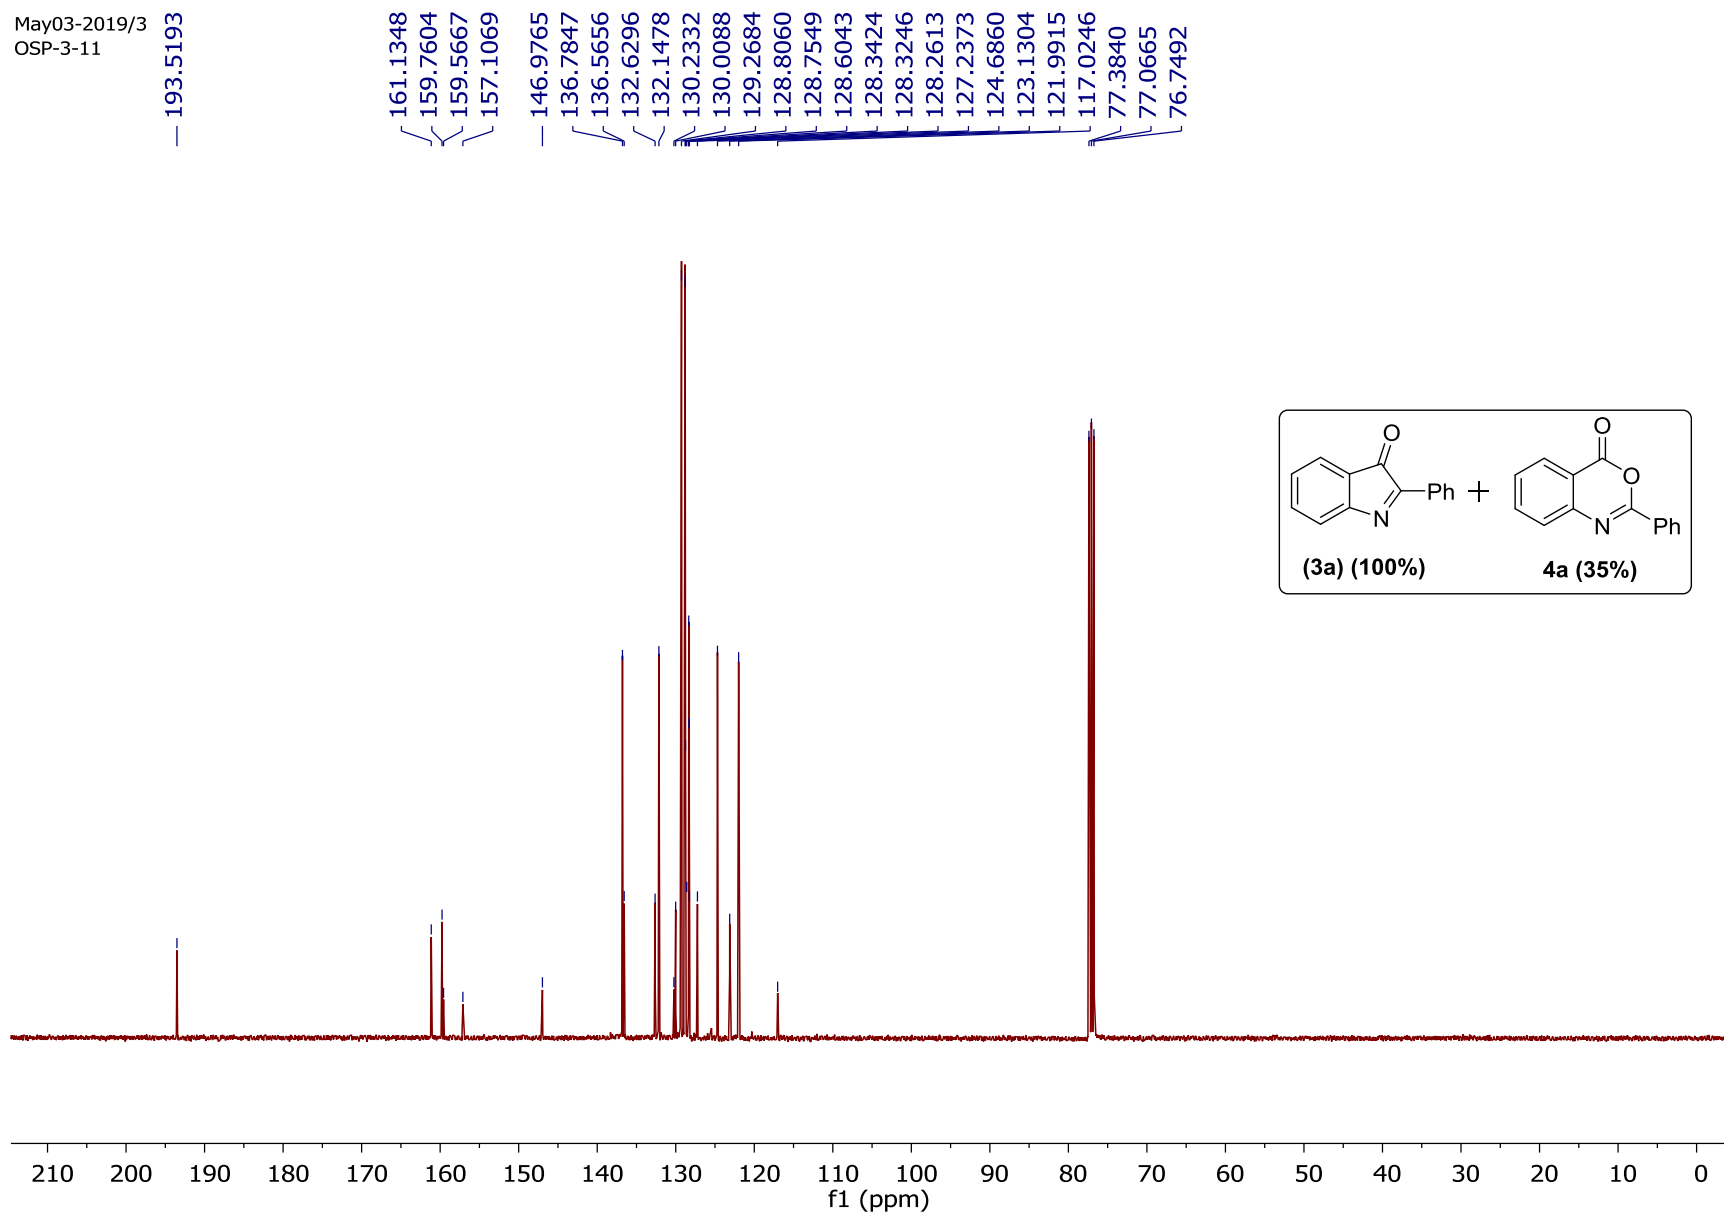

| Sample Name   | Position             | Instrument Name | Instrument 1  | User Name              |
|---------------|----------------------|-----------------|---------------|------------------------|
| OPS-3-11      | P1-F1                |                 |               |                        |
| Inj Vol       | InjPosition          | SampleType      | Sample        | IRM Calibration Status |
| 0.25          |                      |                 |               | Success                |
| Data Filename | ACQ Method           | Comment         | Acquired Time |                        |
| OPS-3-11.d    | ChB60ChD40_Isocratic |                 |               | 5/4/2019 11:31:16 AM   |

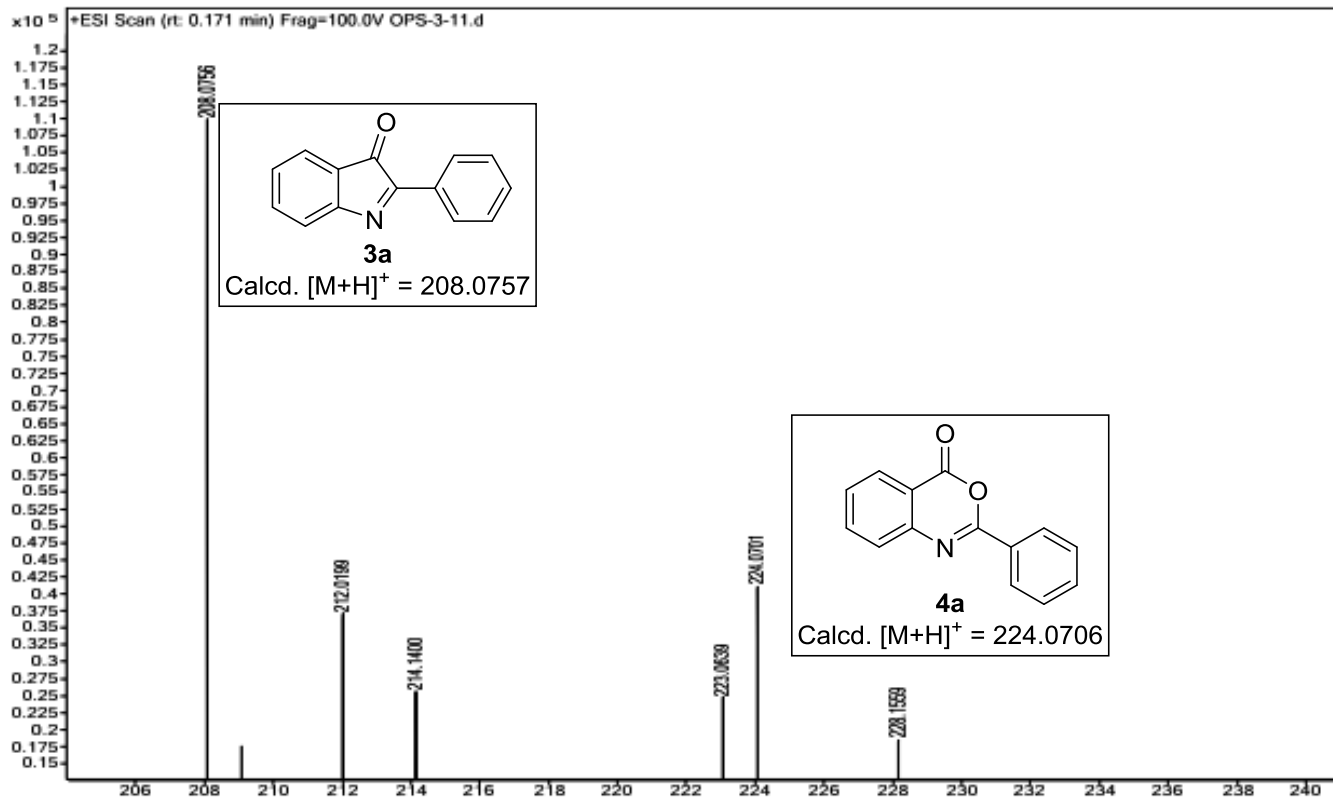

# ESI-HRMS analysis of mixture of 3a and 4a

May02-2019/10  
OSP-3-11

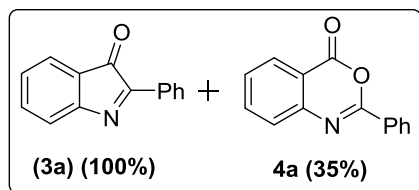

Dec31-2018/1  
OSP-2-109

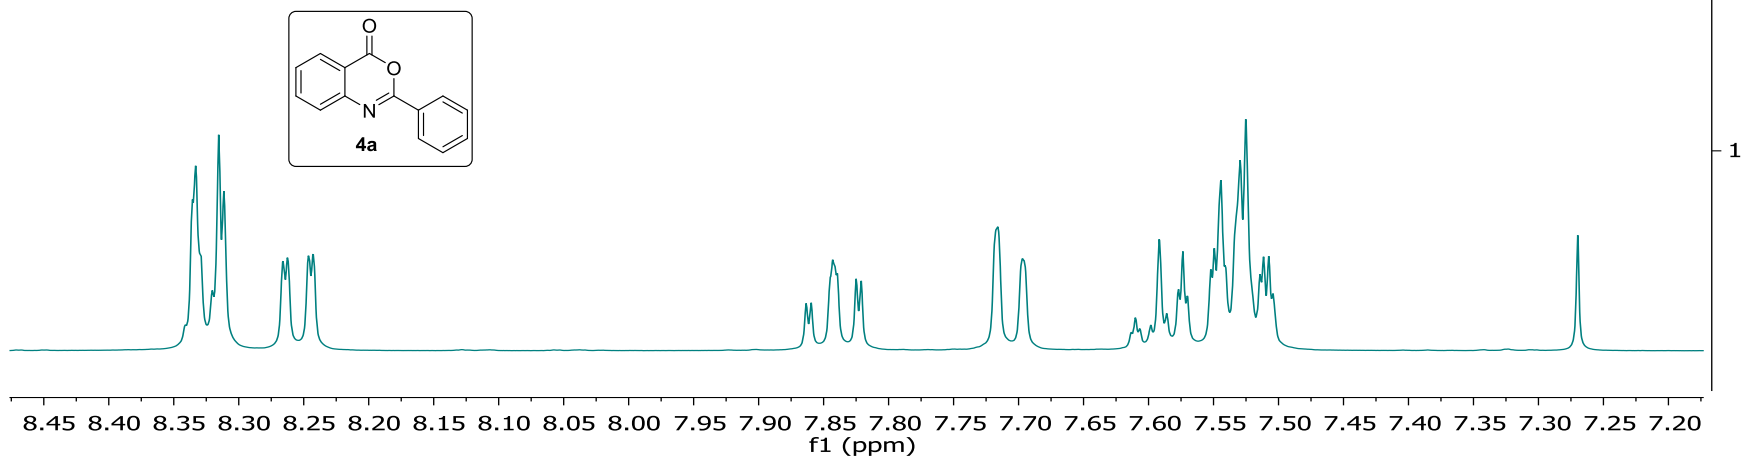

Comparative <sup>1</sup>H NMR of a mixture of 3a and 4a with pure intermediate 4a

May03-2019/3  
OSP-3-11

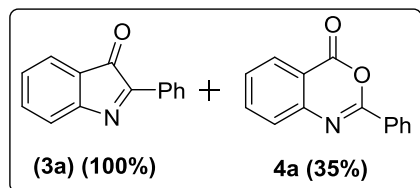

Dec31-2018/2  
OSP-2-109

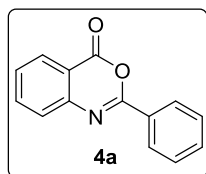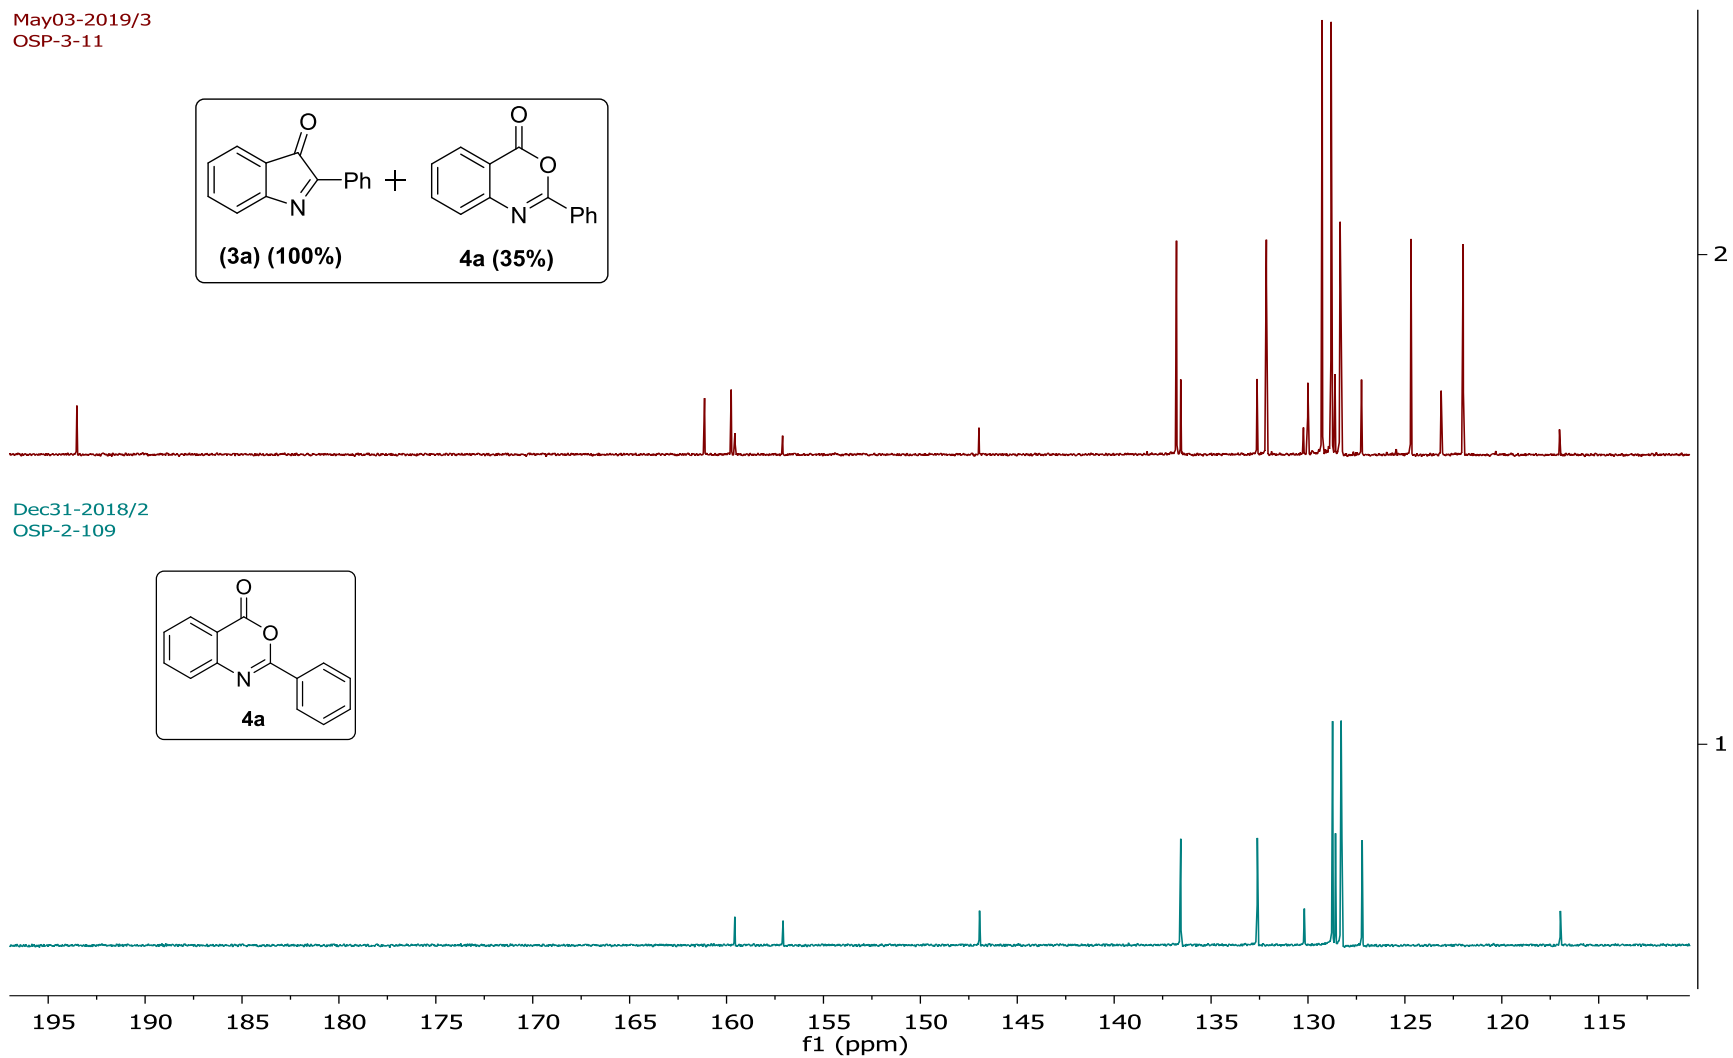

Comparative  $^{13}\text{C}$  NMR of a mixture of 3a and 4a with pure intermediate 4a

3. Unambiguous molecular structure determination of **3s**

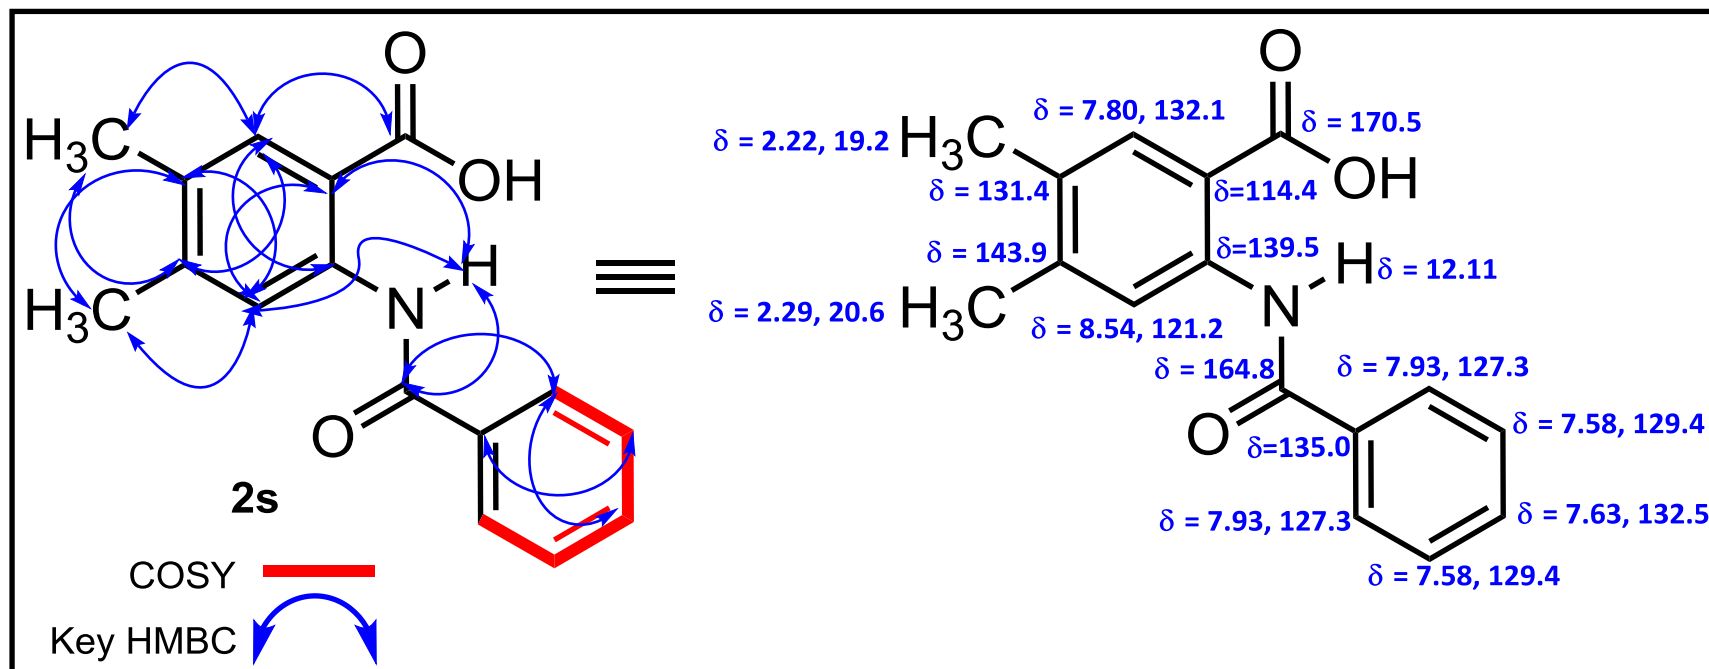

Supplement: c9ob00797k1.pdf [file c9ob00797k1.pdf]
